# Supplementary material for: Identification of truncated forms of U1 snRNA reveals a novel RNA degradation pathway during snRNP biogenesis
Source: PubMed Central journal article supplement — Nucleic Acids Res. 2013 Dec 5;42(4):2708–24. doi: 10.1093/nar/gkt1271 (PMC3936765; doi:10.1093/nar/gkt1271), 2013-12-05
Supplement: supp_gkt1271_nar-00398-a-2013-File023.pdf [file supp_gkt1271_nar-00398-a-2013-File023.pdf]

## Supplementary Materials

### Identification of Truncated Forms of U1 snRNA Reveals a Novel RNA Degradation Pathway during snRNP Biogenesis

Hideaki Ishikawa<sup>1, 2</sup>, Yuko Nobe<sup>2, 3</sup>, Keiichi Izumikawa<sup>1, 2</sup>, Harunori Yoshikawa<sup>2, 4</sup>, Naoki Miyazawa<sup>2, 4</sup>, Goro Terukina<sup>2, 4</sup>, Natsuki Kurokawa<sup>1, 4</sup>, Masato Taoka<sup>2, 3</sup>, Yoshio Yamauchi<sup>3</sup>, Hiroshi Nakayama<sup>2, 5</sup>, Toshiaki Isobe<sup>2, 3</sup>, and Nobuhiro Takahashi<sup>1, 2, 4, \*</sup>

<sup>1</sup> Graduate School of Agriculture, Tokyo University of Agriculture and Technology, 3-5-8 Saiwai-cho, Fuchu-shi, Tokyo 183-8509, Japan

<sup>2</sup> Core Research for Evolutional Science and Technology (CREST), Japan Science and Technology Agency (JST), Sanbancho 5, Chiyoda-ku, Tokyo 102-0075, Japan

<sup>3</sup> Department of Chemistry, Graduate School of Sciences and Engineering, Tokyo Metropolitan University, 1-1 Minamiosawa, Hachioji-shi, Tokyo 192-0397, Japan

<sup>4</sup> Department of Bioengineering, United Graduate School of Agriculture, Tokyo University of Agriculture and Technology, 3-5-8 Saiwai-cho, Fuchu-shi, Tokyo 183-8509, Japan

<sup>5</sup> Biomolecular Characterization Team, RIKEN Advanced Science Institute, 2-1, Hirosawa, Wako, Saitama 351-0198, Japan

\*Correspondence:

Nobuhiro Takahashi, Ph.D.

Applied Biological Science

Tokyo University of Agriculture and Technology

3-5-8 Saiwai-cho, Fuchu, Tokyo 183-8509, Japan

Tel/Fax No.+81-042-367-5709

E-mail: ntakahas@cc.tuat.ac.jp

## **EXPERIMENTAL PROCEDURES**

### **Reagents and Antibodies**

Antibodies to SMN (2B1), Gemin2 (2E17), Gemin3 (12H12), Gemin4 (17D10), Gemin6 (20H8), Gemin8 (1F8), and Unrip (3G6) were generous gifts from Dr. Gideon Dreyfuss. Anti-Gemin5 was obtained from Bethyl Laboratories. Anti-CBP80 was a generous gift from Dr. Robin Reed. Anti-Sm (Y-12) was obtained from Thermo Fisher Scientific. Anti-hnRNP C1/C2 was obtained from ImmuQuest. Anti-La/SSB was obtained from Santa Cruz Biotechnology. Anti-DCP1A (3G4) was obtained from Abnova. Anti-FLAG-M2, rabbit anti-FLAG polyclonal, anti-coilin, anti-mouse or anti-rabbit IgG Cy3-conjugated antibody and anti-FLAG-M2-conjugated agarose beads were obtained from Sigma-Aldrich. Anti-GAPDH was obtained from Ambion. Anti-mouse IgG and alkaline phosphatase-conjugated anti-rabbit IgG were obtained from Cell Signaling Technology. FITC-conjugated anti-rabbit IgG was obtained from American Qualex antibodies. FITC-conjugated anti-mouse IgG was obtained from Kirkegaard & Perry Laboratories, Inc. . Anti-DDX6 and anti-LSM14A were obtained from GeneTex. All general reagents were purchased from Wako Pure Chemical, Kanto Chemical, or Nacalai Tesque.

### **Construction of Epitope-tagged Expression Plasmids**

RT-PCR was performed with the Super Script II kit (Invitrogen) using total mRNA prepared from HEK293 cells. cDNAs encoding SMN (NM\_000344), LUC7L (NM\_201412), snurpotin1 (NM\_005701), PHAX (NM\_032177), U1-70K (NM\_003089), Gemin2 (NM\_003616), Gemin4 (NM\_015721), Gemin5 (NM\_015465), Gemin6 (NM\_024775), SmB (NM\_003091), SmD1 (NM\_006938) and SmE (NM\_003094) were amplified by PCR using primer sets 5'-GAAGAAGGATCCGCGATGAGCAGCGGCGGCAGT-3' and 5'-GAAGAACTCGAGATTTAAGGAATGTGAGCACCT-3' for SMN, 5'-GAAGAAGGATCCCACCATGGGATCCGCCAGGCGCAGAT-3' and 5'-CAAGAATTCCGATCTCGCCGGCCTCCT-3' for LUC7L, 5'-GAAGAAGGATCCCACCATGGAAGAGTTGAGTCAGGCCCT-3' and 5'-CAAGAATTCCATTCTCCATGAGGCATCCAGGGT-3' for snurportin1, 5'-GAAGAAAAGCTTCACCATGGCGTTGGAGGTCGGCGA-3' and 5'-CAAGAATTCCAAAGATGTCCAAATCATGAGAATGATCAACT-3' for PHAX, 5'-GAAGAAAAGCTTCACCATGGGAACCCAGTTCCTGCCGCCCA-3' and

5'-CAAGAATTCCTCCGCGCAGCCTCCAT-3' for U1-70K,  
 5'-GAAGAAAAGCTTATGCGCCGAGCGGAACTGGCTG-3' and  
 5'-CAACTCGAGTCAAGATGGCTCATCAGCTAAATCAC-3' for Gemin2,  
 5'-GAAGGTACCATGGACCTAGGACCCTTGAAC-3' and  
 5'-CAACTCGAGTCAGAAGCTGCTCATCTTCTG-3' for Gemin4,  
 5'-GAAGAAGCTAGCCACCATGGGGCAGGAGCCGC-3' and  
 5'-CAACTCGAGGATATCCCCATACAGAAGGTCTGGCAGTGT-3' for Gemin5,  
 5'-GAAGAAAAGCTTATGAGTGAATGGATGAAGAAAGG-3' and  
 5'-CAACTCGAGTCATTGGGAAGCTGTAAGATGTC-3' for Gemin6,  
 5'-GAAGAAAAGCTTATGACGGTGGGCAAGAGCAGCAAG -3' and  
 5'-CAAGCGGCCGCTCAAAGAAGGCCTCGCATCCCAG-3' for SmB,  
 5'-GAAGAAAAGCTTATGAAGCTCGTGAGATTTTTGATG-3' and  
 5'-CAACTCGAGTTATCGCCTAGGACCCCTCTTC-3' for SmD1, and  
 5'-GAAGAAAAGCTTATGGCGTACCGTGGCCAGGGTC-3' and  
 5'-CAACTCGAGCTAGTTGGAGACACTTTGTAGCAG-3' for SmE.

The PCR products were cloned into the following sites of pcDNA3.1(+): BamH I/Xho I (for SMN), BamH I/EcoR I (for LUC7L and snurportin1), Hind III/EcoR I (for PHAX and U1-70K), Kpn I/Xho I (for Gemin4), Hind III/Xho I (for Gemin2, Gemin6, SmD1 and SmE), Hind III/Not I (for SmB) and Nhe I/EcoR V (for Gemin5). All cloned cDNAs were verified by DNA sequencing.

The cloned cDNAs were subcloned into pcDNA3.1(+)-DAP (38), pcDNA3.1-EF (C-terminal TEV-FLAG tag), or pcDNA3.1(+)-HEF (N-terminal HA-TEV-FLAG or C-terminal FLAG-TEV-HA tag) to create epitope-tag fusions. N-terminal tag-fused proteins are prefixed with "HEF", and C-terminal tag-fused proteins contained the suffix "EF" or "HEF". The DAP tag-fused SMN coding sequence was excised with Bgl II/Apa I and ligated into the Bgl II/Apa I site of pcDNA5-FRT for stable expression.

cDNAs for LUC7L-EF and snurportin1-EF were excised with BamH I/Xho I and ligated into the same sites of pcDNA5-FRT/TO. PHAX-EF cDNA was ligated into Hind III/Xho I sites of pcDNA5-FRT/TO; U1-70K-EF cDNA was ligated into Hind III/EcoR V sites of pcDNA-FRT/TO-PHAX-EF after removal of the PHAX coding sequence via Hind III/EcoR V; Tag-less Gemin4 cDNA was ligated into Kpn I/Xho I sites of pcDNA5-FRT/TO-HEF. Tag-less Gemin2, Gemin6, SmD1 and SmE cDNAs were ligated into Hind III/Xho I sites of pcDNA5-FRT/TO-HEF vector, respectively. Tag-less SmB cDNA was ligated into Hind III/Not I sites of pcDNA5-FRT/TO-HEF vector. Plasmid expressing Gemin5 was constructed as follows:

1) pcDNA3.1-Gemin5-HEF was cut with Nhe I, and a Klenow fill-in reaction generated a blunt end; 2) pcDNA5-FRT/TO was cut with Hind III with subsequent Klenow fill-in; 3) pcDNA3.1-Gemin5-HEF was partially digested with Xho I to yield the full-length Gemin5-HEF coding sequence, and pcDNA5-FRT/TO was completely digested with Xho I; 4) a DNA fragment encoding Gemin5-HEF was ligated into the blunt end/Xho I sites of pcDNA5-FRT/TO. All constructs were verified by sequencing.

For RNA aptamer-based affinity purification, cDNA encoding *Pseudomonas aeruginosa* phage 7 (PP7) coat protein (PP7CP) was amplified by PCR with pET28ZZTPP7His as template using the primer set

5'-GAAGAAAAGCTTCACCATGGCCAAAACCATCGTTCTTG-3' and

5'-CAAGAATTCACGGCCCAGCGGCACAAG-3'. The PCR-amplified fragment was excised

with Hind III/Eco RI and ligated into the corresponding sites of pcDNA3.1-HF for expression of C-terminally HA-FLAG-tagged PP7CP in human cells. The pcDNA3.1-PP7CP-HF construct was verified by sequencing. Sequences encoding the primer set

5'-GAAGAAGATATCGGGTTCTGGTGCCGAGAATTTGTATTTTCAGGGTTCTGGTGCCGATTA CAAGGATGACGAC-3' and

5'-TTCTTCCTCGAGCCCGGGTTACTTATCGTCGTCATCCTTGTAATCGG-3' were amplified by PCR to yield cDNA fragment containing EF-tag coding sequence. The extended and amplified fragments were cut with EcoR V/Xho I and ligated into the corresponding sites of pcDNA3.1(+) to yield pcDNA3.1(+)-EF.

Primer set 5'-GAAGAAGCTAGCCACCATGGGATACCCATATGACGTCCCGGACTACGCC-3' and 5'-GAACCCTGGAAGTACAAATTCTCACCAGAACCGGCGTAGTCCGGGACGT-3' or

5'-GAATTTGTA CTTCAGGGTTCTGGTGCCGATTACAAGGATGACGACGAT-3' and

5'-TTCTTCAAGCTTGGCACCAGAACCCTTATCGTCGTCATCCTTGTAATCG-3' was used to

extend and PCR-amplify each primer set. By using extended primer sets, further extension and amplification were done by additional PCR to obtain the cDNA fragment

5'-GAAGAAGCTAGCCACCATGGGATACCCATATGACGTCCCGGACTACGCCGGTTCTGGTG AGAATTTGTA CTTCAGGGTTCTGGTGCCGATTACAAGGATGACGACGATAAGGGTTCTGG TGCCAAGCTTGAAGAA-3'. This final product was ligated into NheI/HindIII sites of pcDNA3.1(+)

to yield pcDNA3.1(+)-HEF encoding an N-terminal HEF tag. Similarly, primer set

5'-GAAGATATCGGGTTCTGGTGCCGATTACAAGGATGACGACGATAAGG-3' and

5'-TGGAAGTACAAATTCTCGGCACCAGAACCCTTATCGTCGTCATCCTT-3' or



5'-CCGAGAATTTGTA CTTCCAGGGTTCTGGTGCCTACCCATATGACG-3' and 5'-CAACTCGAGTTAGGCGTAGTCCGGGACGTCATATGGGTAGGCA-3' was used to prepare the cDNA fragment 5'-GAAGATATCGGGTTCTGGTGCCGATTACAAGGATGACGACGATAAGGGTTCTGGTGCCGAGAATTTGTA CTTCCAGGGTTCTGGTGCCTACCCATATGACGTCCCGGACTACGCCTAACTCGAGTTG-3' to construct pcDNA3.1(+)-HEF encoding a C-terminal HEF tag; namely, the cDNA fragment was ligated into EcoR V/Xho I sites of pcDNA3.1(+). Using pcDNA3.1(+)-HEF containing an N-terminal HEF tag sequence as template, flanking region of HEF tag coding sequence was amplified with primer set 5'-CACCATGGGATACCCATATGAC-3' and 5'-TTCGGATCCGAGCTCGGTACCAAG-3'. pcDNA5-FRT/TO vector was cut with Hind III with subsequent klenow fill-in to make blunt end, digested with BamH I and ligated with BamH I digest of the amplified fragment to make pcDNA5-FRT/TO-HEF. All constructs were verified by DNA sequencing.

### **Cell Culture and Transfection**

HEK293, Flp-In T-REx-293, 293T, HeLa, and MCF7 cells were maintained according to standard methods in Dulbecco's modified Eagle's medium (DMEM) supplemented with 10% heat-inactivated fetal calf serum in a humidified atmosphere of 95% air and 5% CO<sub>2</sub>. Transfection was performed by either the calcium phosphate method or lipofection method; lipofection was performed with Lipofectamine 2000, Lipofectamine RNAiMAX, or Lipofectamine LTX reagent according to manufacturer's protocol (Life Technologies–Invitrogen).

### **Total RNA Extraction**

After washing with PBS(-), cells were harvested in tubes and pelleted via centrifugation at 1,200 × *g* for 5 min at 4°C. Total RNA extraction was performed with the RNeasy total RNA isolation system (Qiagen) according to manufacturer's protocol.

### **Preparation of Stable or Doxycycline-inducible Cell Lines Expressing Epitope-tagged Protein**

Flp-In T-REx-293 cells were cultured in DMEM at 37°C, seeded in a 24-well plate, and transfected with 2 μl Lipofectamine 2000 mixed with 0.25 μg of an appropriate pcDNA5-FRT or

pcDNA5-FRT/TO construct together with 0.25  $\mu\text{g}$  of pOG44 vector (Invitrogen). When cells reached 90–100% confluency approximately 24–48 h after transfection, 100  $\mu\text{g}/\text{ml}$  of hygromycin B (Invitrogen) was added to DMEM supplemented with 10% fetal bovine serum. Cells were cultured further for ~2 weeks with this medium containing 100  $\mu\text{g}/\text{ml}$  hygromycin B, and the medium was changed every 2 days. Selected cell colonies were cultured in large scale for additional experiments.

### **Epitope-tag Affinity Purification**

Doxycycline-inducible Flip-In T-REx 293 cells ( $1 \times 10^6$  in DMEM) expressing epitope-tagged protein were treated with 1  $\mu\text{g}/\text{ml}$  doxycycline for 48 h. The cells were harvested from three 90-mm dishes, washed with PBS (–) once, lysed by vigorous mixing for 30 s in 1 ml lysis buffer (50 mM Tris-HCl pH 8.0, containing 150 mM NaCl, 0.5% (w/v) IGEPAL-CA630, 1 mM PMSF), and incubated on ice for 30 min. Soluble whole-cell lysate was prepared by centrifugation at  $20,000 \times g$  for 30 min at 4°C, and the resultant supernatant was incubated with 10–15  $\mu\text{l}$  anti-FLAG M2 agarose beads (Sigma-Aldrich) for 3 h at 4°C with rotation. After washing the beads five times with 1 ml lysis buffer and once with 50 mM Tris-HCl pH 8.0 containing 150 mM NaCl, bound proteins and RNAs were eluted with 500  $\mu\text{g}/\text{ml}$  FLAG peptide in the same buffer and used for further experiments.

### **Extraction of Protein and RNA from RNPs**

RNPs prepared by epitope-tag purification were solvated in an equal volume of 2 $\times$  RNA extraction solution (10 mM Tris-HCl pH 8.0 containing 7 M urea, 350 mM NaCl, 1% SDS, 10 mM EDTA) and buffered phenol/chloroform (pH 8.0) and mixed vigorously. The aqueous and organic phases were separated by centrifugation at  $20,000 \times g$  for 30 min at 4°C. To the aqueous phase containing RNAs, an equal volume of 2-propanol was added to precipitate RNAs; to the organic phase containing proteins, 4 volumes of 2-propanol were added, and the solution was mixed. RNAs or proteins were pelleted via centrifugation at  $20,000 \times g$  for 30 min at 4°C. Each precipitate was rinsed with 75% ethanol and air-dried. RNA and protein samples were submitted for further analysis.

### **Electrophoresis of RNA and In-gel RNA Digestion**

RNAs were separated via PAGE essentially as described (50). Briefly, RNA in solution was denatured prior to electrophoresis by mixing with 9 volumes of a loading buffer containing 2 mM EDTA (pH 8.0) and 95% formamide, heating at 65°C for 10 min, and cooling immediately on ice. RNA was separated on 10% (w/v) polyacrylamide gels containing 8 M urea and 0.5× TBE (45 mM Tris base, 32.3 mM boric acid, 1.25 mM EDTA, pH 8.3) with 0.5× TBE as a running buffer, and gels were stained with SYBR Gold (Invitrogen) for 10 min.

In-gel RNA digestion was done essentially as described (33). Briefly, excised gel pieces containing RNAs were cut into small pieces and dried under vacuum. Gel pieces were digested in 15  $\mu$ l of 2 ng/ $\mu$ l RNase T1, with incubation at 37°C for 1 h. The nucleolytic fragments were extracted from the gel using 100  $\mu$ l of RNase-free water, passed through a centrifugal filter unit with a polyvinylidene fluoride membrane (Ultrafree-MC, Millipore, Billerica, MA), and then 5  $\mu$ l of 2 M triethylammonium acetate (pH 7.0) was added before LC-MS analysis.

### **LC-MS Apparatus for RNA Analysis**

The LC system used was essentially as described (51), consisting of a nanoflow pump (LC Assist) that delivers solvent to a fritless spray tip electrospray ionization column and a ReNCon gradient device. The column was prepared with a fused-silica capillary (150  $\mu$ m i.d.  $\times$  375  $\mu$ m o.d.) using a laser puller (Sutter Instruments) and was slurry-packed with reverse-phase material (Develosil C30-UG-3, particle size 3  $\mu$ m, Nomura Chemical) to a length of 50 mm. High voltage for ionization in the negative mode was applied, and the LC eluate was sprayed in-line to an LTQ-Orbitrap hybrid mass spectrometer (model XL, Thermo Fisher Scientific). LC was performed at a flow rate of 100 nl/min using a 40-min linear gradient from 5% to 40% methanol in 10 mM triethylammonium acetate (pH 7.0). The mass spectrometer was operated in a mode to automatically switch between Orbitrap-MS and linear ion trap-MS/MS acquisition as described (32).

### **Immunoblotting**

Proteins were dissolved in SDS-PAGE sample buffer, separated by SDS-PAGE, and transferred electrophoretically to a polyvinylidene difluoride membrane. The membrane was treated with 5% non-fat dried milk in PBS at 4°C at least for 1 h and then incubated with an appropriate antibody overnight at 4°C. The membrane was washed three times with TBST (Tris-buffered saline containing 0.1% w/v Tween 20) for 10 min, incubated with a secondary antibody conjugated with

alkaline phosphatase for 1 h at room temperature, washed three times with TBST for 10 min, washed once with TBS for 5 min, and stained by adding NBT (nitro-blue tetrazolium chloride)/BCIP (5-bromo-4-chloro-3'-Indolylphosphatase *p*-toluidine salt) solution, which was prepared by a (1:50) dilution of NBT/BCIP stock solution (Roche) with alkaline phosphatase buffer (100 mM Tris-HCl pH 9.5, 100 mM NaCl, 50 mM MgCl<sub>2</sub>).

### **Denatured Urea PAGE and Northern Blotting**

RNAs prepared from RNPs or from whole cells were analyzed by northern blotting. RNA (1 μg per lane) was loaded for denaturing urea-PAGE (7.5 M urea, 9% polyacrylamide) in 0.5× TBE running buffer at 12.5 V/cm for 2–3 h. RNAs separated via PAGE were transferred electrophoretically to a Hybond-N+ membrane (GE Healthcare) using a semi-dry blotting apparatus with 0.5× TBE. The membrane was dried, cross-linked by UV irradiation, and blocked for at least for 1 h with salmon sperm DNA in pre-hybridization buffer containing 5× SSC (saline-sodium citrate buffer), 20 mM NaH<sub>2</sub>PO<sub>4</sub> pH 7.5, 7% SDS, 2× Denhardt's Solution, and 40 μg/ml sheared salmon sperm DNA. After blocking, RNA was hybridized with an oligonucleotide labeled with biotin (see method below) overnight at 50°C. The hybridized membrane was washed twice with non-stringent wash solution (3× SSC, 25 mM NaH<sub>2</sub>PO<sub>4</sub> pH 7.5, 5% SDS) for 15 min and twice with stringent wash solution (1× SSC, 1% SDS) for 15 min. RNAs hybridized with biotin-labeled DNA were visualized with a chemiluminescent nucleic acid detection module (Thermo Fisher Scientific) and detected with an LAS4000 luminescent image analyzer (Fujifilm).

### **RNA Interference**

HeLa (1 × 10<sup>5</sup> cells) or 293T cells (5 × 10<sup>5</sup> cells) were cultured in 35-mm dishes until they reached 80% confluency. HeLa cells were transfected with 3 μl of Lipofectamine RNAiMAX and 60 pmol of a stealth small interfering RNA (siRNA) specific for HeLa cells. 293T cells were transfected with 5 μl of Lipofectamine RNAiMAX and 100 pmol of a stealth siRNA. The following stealth siRNAs were used to knockdown the transcripts as noted:

5'-CGGUUGCAUUUACCCAGCUACCAUU-3' and 5'-AAUGGUAGCUGGGUAAAUGCAACCG-3' for SMN, 5'-CGAAGCAGCUCAAUGUCCAGAUGUU-3' and 5'-AACAUUCUGGACAUUGAGCUGCUUCG-3' for Gemin2, 5'-CGACGACAACUCUGUAGACUGAGUU-3' and 5'-AACUCAGUCUACAGAGUUGUCGUCG-3' for Gemin2 negative control, 5'-GACCUCCUCCCAAAGAUACUGGUAU-3' and

5'-AUACCAGUAUCUUUGGGAGGAGGUC-3' for SmB/B' (siRNA1),  
5'-UCCUGGUAUGAGACCUCCUAUGGGU-3' and  
5'-ACCCAUAGGAGGUCUCAUACCAGGA-3' for SmB/B' (siRNA2), and  
5'-GACCCUCCCAAAGAUACUGGCUUAU-3' and  
5'-AUAAGCCAGUAUCUUUGGGAGGGUC-3' for SmB/B' negative control. The cells were transferred to 35-mm or 60-mm dishes 24 h after transfection. The transfected cells were cultured in DMEM supplemented with 10% fetal bovine serum, and samples ( $\sim 5 \times 10^5$  cells) were taken at various time points.

### **Biotin Labeling of Oligonucleotide Probes for Northern Blotting**

The following oligonucleotide probes were labeled at the 3' end with biotin using the Biotin 3' End DNA Labeling kit (Pierce):

U1-#1 probe (5'-GTATCTCCCCTGCCAGGTAAGTAT-3'),  
U1-#2 probe (5'-AGCACATCCGGAGTGCAATGGATA-3'),  
U1-#3 probe (5'-TATGCAGTCGAGTTTCCCACATTTGG-3'),  
U1-#4 probe (5'-GCAGTCCCCCACTACCACAAAT-3'),  
U2 probe (5'-TACTGCAATACCAGGTCGATGCGT-3'),  
U4 probe (5'-GACTATATTGCAAGTCGTCACGGC-3'),  
U5 probe (5'-GACTCAGAGTTATTCTCTCCACG-3'),  
U6 probe (5'-ACGAATTTGCGTGTTCATCCTTGCG-3'),  
U7 probe (5'-AGCCAGAAAGCCTACTAGACAAATTCT-3'),  
U11 probe (5'-TACGTGTGCCACTCACGACAGAAG-3'),  
5S probe (5'-TTCCGAGATCAGACGAGATCGG-3'),  
5.8S probe (5'-AGACAGGCGTAGCCCCGGGAGGAA-3'),  
Met-tRNA probe (5'-TAGCAGAGGATGGTTTCGATCCATCGA-3'),  
y18Sn tag probe (5'-CCAAAGCCTGAATCCTCG-3'),  
RAT tag probe (5'-ACGTCTAAGGGTTTCCATATAAACTCCTT-3'),  
7SK probe (5'-AGGCAGACTGCCACATGCAG-3'), and  
7SK-5' probe (5'-TGGGGTGACAGATGTTCGCAGCCAGAT-3').

### **Immunocytochemical Analysis**

Cells were washed with PBS, fixed with 4% paraformaldehyde in PBS for 10 min at room

temperature, and washed twice with PBST (PBS with 0.05% w/v Tween 20). The cells were permeabilized by treating with PBS containing 0.1% (w/v) Triton X-100 for 5 min at room temperature, washed once with PBST, blocked with 3% (w/v) non-fat dried milk in PBS for at least 30 min, and incubated with an appropriate primary antibody diluted in 3% non-fat dried milk /PBS for 1 h at room temperature. The cells were washed three times in PBST for 10 min and incubated with a fluorochrome-conjugated secondary antibody diluted in 3% non-fat dried milk /PBS for 1 h at room temperature. After washing three times in PBST for 10 min, the cells were mounted with Vectashield and observed with an Axiovert 200 M microscope (Carl Zeiss). When the experiment was done with FISH, the antibodies were diluted with 100  $\mu$ g/ml BSA instead of 3% non-fat dried milk/PBS and total washing time with PBST was shortened.

### **Glycerol Density Gradient Ultracentrifugation**

Cell extract was prepared by the method described in “Epitope-tag Affinity Purification”. Protein concentration of the cell extract was determined using Protein Assay kit (Bio-Rad). Cell extract (2.5 mg) of control T-REx 293 cells or Gemin5-HEF expressing T-Rex 293 cells was layered on a 10–30% (v/v) glycerol density gradient containing 50 mM Tris-HCl pH 8.0 and 150 mM NaCl, centrifuged with a Beckman MLS50 rotor at 40,000 rpm (average 128,400  $\times$  *g*) for 185 min at 4°C, and fractionated into 10 fractions (500  $\mu$ l each). Fractions 2 and 3 (as mixture A), 5 and 6 (as mixture B), or 8 and 9 (as mixture C) were mixed and subjected to the pull-down analysis described in “Epitope-tag Affinity Purification”.

### Figure S1

(A) DAP-SMN-expressing Flip-In T-REx 293 cells were analyzed by immunocytochemistry with a primary antibody against FLAG, SMN, or SmB/B' (Y-12). FITC-labeled anti-rabbit IgG (green) was used as the secondary antibody to detect DAP-SMN. Cy3-labeled anti-mouse IgG secondary antibody (red) detected endogenous and exogenous SMN or SmB/B'. DAPI staining shows the nucleus. Merge: FITC, Cy3, and DAPI staining are merged, Scale bar: 10  $\mu\text{m}$ .

(B) Proteins were pulled down (PD:FLAG) from DAP-SMN-expressing Flip-In T-REx 293 cells (DAP-SMN) or their parent T-REx 293 cells (T-Rex) with anti-FLAG-conjugated beads, separated by SDS-PAGE, and visualized by silver staining (left) or immunoblotting (IB) with antibodies against the proteins indicated (right). Input (1% Input) is the cell extract used for pull-down.

### Figure S2

A) The trimethylguanosine 5'cap and the first four nucleotides are shown. Major fragmentation sites and the major *c/y*- and *a/w*-series ions produced by collision-induced dissociation are indicated. Annotations for the product ions are given based on the nomenclature of Mcluckey et al. (52).

(B) The RNase T1 5'-terminal oligonucleotide produced from the U1 snRNA or U1-tfs fraction in Figure 1C was digested with RNase A and tobacco acid pyrophosphatase and subjected to LC-MS/MS. The MS/MS spectrum of pAmUmACp generated from the RNase T1 5'-terminal oligonucleotide of U1 snRNA (upper) or that of pmAmUmACp generated from the RNase T1 5'-terminal oligonucleotide of U1-tfs (bottom) is indicated. *c/y* and *a/w* ions generated by MS/MS fragmentation are indicated in each spectrum (see Figure S2A for the explanation of *c/y* and *a/w*). Inset in the upper left of each spectrum shows an enlarged view of the range  $m/z=300\sim m/z=450$ .

(C) Enlarged views of the mass range  $m/z=590\sim m/z=660$  of the spectra in Figure S2B. All ions except *y*<sub>2</sub> indicated in the bottom spectrum show mass-*m/z* values higher than those observed in the top spectrum. Open arrow in the upper MS/MS spectrum of pAmUmACp indicates the position of the ion having base methylation of the first adenine.

(D) MS/MS spectrum of the 3'-terminal oligonucleotide, CUUUCCCCUG-OH or CUUUCCCCUG>p, generated by RNase T1 digestion of the U1 snRNA fraction.

(E) MS/MS spectrum of CAmCUCCG>p generated from U1 snRNA (upper) or that of CACUCCG>p generated from U1-tfs (bottom). *c/y* and *a/w* ions generated by MS/MS fragmentation are indicated in each spectrum.

(F) Structural features of U1 snRNA and U1-tfs RNA associated with SMN. U1-tfs have a monomethylguanosine cap with additional base methylation at the first adenosine, whereas U1 snRNA has a trimethylguanosine cap with no additional base methylation. Ribose is methylated at adenosine 70 (Am) in U1 snRNA but not in U1-tfs. U1-tfs lack the Sm protein-binding site and SL4 region.

### Figure S3

HEF-Gemin2-, HEF-Gemin6-, HEF-SmB/B'-, HEF-SmD1, and HEF-SmE-associated RNA-protein complexes were prepared by pull-down method and analyzed by SDS-PAGE and silver staining or immunoblotting (IB) with anti-FLAG antibody, and by denaturing urea PAGE -SYBR Gold-staining or northern blotting with the probes indicated.

### Figure S4

(A) Schematic diagram of the U1 gene used for the construction of vectors expressing U1 snRNA. The cis-acting elements DSE (distal sequence element, blue), PSE (proximal sequence element, purple), and 3'box element (green) are indicated as well as the U1 coding region (red). The DNA sequence of the U1 gene is also shown, and the sequences corresponding to DSE, PSE, 3'box, and U1 coding region are highlighted with color. (B) Schematic diagram of U1 gene constructs expressing U1 snRNA and/or U1-tfs. See the text for the explanation of each construct (WT,  $\Delta$ SmSL4,  $\Delta$ PSE,  $\Delta$ DSE, and  $\Delta$ 3' box). DSE: distal sequence element, PSE: proximal sequence element, SL: stem loop, Sm: Sm protein-binding site. (C) Total RNA was extracted from 293 EBNA cells transfected with an expression vector encoding WT,  $\Delta$ SmSL4,  $\Delta$ PSE,  $\Delta$ DSE, or  $\Delta$ 3' box. RNAs were analyzed by northern blotting with probe #1 or #3. Arrowhead indicates a band corresponding to endogenous U1 snRNA along with exogenous U1 or the endogenous U1-tfs and exogenous U1-tfs. Graph presents the mean  $\pm$  SD of triplicate experiments; staining intensity of the U1-tfs band was standardized with that of U1-tfs observed in untransfected control. P values are for the comparison with the control using the t test (\*P < 0.1, \*\*P < 0.05). RNA staining with SYBR Gold is also shown. (D) RNAs were extracted from cells transiently transfected with the RAT-tagged U1 gene derivatives and separated by denaturing urea-PAGE. Subsequent northern blot analysis was carried out with probe #1 (detects both endogenous and RAT-tagged U1) and with the RAT probe (detects only exogenously expressed RAT-tagged U1). SYBR Gold staining (left) shows the RNAs used for the northern blot. RAT-WT, RAT- $\Delta$ SmSL4, and RAT- $\Delta$ Sm are expected to produce RAT-tagged snRNAs with 239 nt, 200 nt, and 231 nt,



respectively. (E) Total RNA extracted from 293T cells transiently transfected with an expression vector composed of one of the RAT-tagged constructs (RAT-WT, RAT- $\Delta$ SmSL4, RAT- $\Delta$ SL4-1, RAT- $\Delta$ SL4-2, RAT- $\Delta$ SL4-3, RAT- $\Delta$ SL4-1 $\Delta$ 3'box, RAT- $\Delta$ SL4-2 $\Delta$ 3'box, and RAT- $\Delta$ SL4-3 $\Delta$ 3'box) was analyzed by northern blotting with the RAT probe or probe #1. SYBR Gold staining (left) shows the RNAs used for the northern blot. Arrowheads indicate the predicted size of RAT-tagged U1 snRNA (239 nt) and RAT-tagged U1-tfs (200 nt).

#### Figure S5.

(A) 293T cells transfected with an expression vector encoding y18Sn- $\Delta$ SL4-1, were subjected to FISH. Endogenous U1 snRNA, exogenous U1 snRNA and U1-tfs were detected with probe #3, or #SL4 labeled with FITC (green). Exogenously expressed U1 snRNA or U1-tfs were also detected with the Cy3-labeled y18Sn probe (red). DAPI staining shows the nucleus. Merge: FITC, Cy3, and DAPI staining are merged, Scale bar: 10  $\mu$ m.

(B) y18Sn-WT-, y18Sn- $\Delta$ Sm-, or, y18Sn- $\Delta$ SL4-1-expressing cells were stained by immunocytochemistry with antibodies against SMN (green) and by FISH with the Cy3-labeled y18Sn probe (red).

(C) y18Sn- $\Delta$ SL4-1-expressing cells were stained by immunocytochemistry with antibodies against the proteins (green) indicated and by FISH with the Cy3-labeled y18Sn probe (red).

#### Figure S6

(A) Proteins were pulled down from extract of RAT-7SK-, RAT-WT, RAT- $\Delta$ 3'box, RAT- $\Delta$ SL4-2-, or RAT- $\Delta$ SL4-2 $\Delta$ 3'box-expressing cells by RAT-based affinity purification, and were visualized by immunoblotting (IB) with antibodies against the proteins indicated. RAT-tagged RNAs were detected by northern blotting with the RAT probe or #1. PD: RAT, RAT-tagged RNA-protein complex bound to FLAG-tagged PP7CP was pulled down with anti-FLAG-conjugated beads and eluted with FLAG peptide. (B) Reverse-phase LC separation of the RNase T1 digest of RAT-U1 snRNA (RAT-WT) or RAT-U1-tfs (RAT- $\Delta$ SL4-1 or RAT- $\Delta$ SL4-1 $\Delta$ 3'box). Effluent was monitored as the count of total ions, m/z=1349.15 (MMG-mAmUmACUUACCUG; MMG-3m), m/z=1344.48 (MMG-AmUmACUUACCUG; MMG-2m), or m/z=1353.82

#### Figure S7

(A) Total RNA was prepared from cells transfected with a stealth siRNA (si) for SmB/B'

knockdown or Gemin2 knockdown, separated by denaturing urea-PAGE, and detected with SYBR Gold staining. Knockdown efficiency was examined by immunoblotting (IB) with antibodies against SmB/B' and Gemin2. In the graph, SYBR Gold staining intensity of U1 or U2 was standardized with that of the corresponding RNA present in cells transfected with a control RNA (sc, a scrambled-sequence of the SmB/B' siRNA). Each value represents the mean  $\pm$  SD of three independent experiments. (B) Cells were analyzed by combination of immunocytochemistry with the antibody against SmB/B', SMN, or DCP1A (red) and FISH with the probe #1 (green). The si-2 target sequence in SmB/B' differs from that of si-1. After the knockdown of SmB/B' with si-2, FISH was done with the probe complementary to U2 snRNA (green), and the immunocytochemistry with the antibody against DCP1A (green). (C) The SmB/B' knockdown cells (si-1) were analyzed by FISH with the probe #1, or #3 (green) and that complementary to U2 snRNA (U2) or 5' internal spacer sequence of ribosomal RNA (5'ITS1) (red). (D) The SmB/B' knockdown cells (si-2) were analyzed by FISH with the probe U2 and the probe #1, or #3 (green). (E) 293T cells co-transfected with y18Sn-WT and stealth RNA for SMN knockdown were analyzed by FISH with the probe y18Sn and by immunocytochemistry with anti-SMN as the primary antibody and FITC-labeled secondary antibody. DAPI staining shows the nucleus. Enlarged view of the FISH staining was also shown. Merge: FITC, Cy3, and DAPI staining are merged, Scale bar: 10  $\mu$ m.

**Figure S1A**

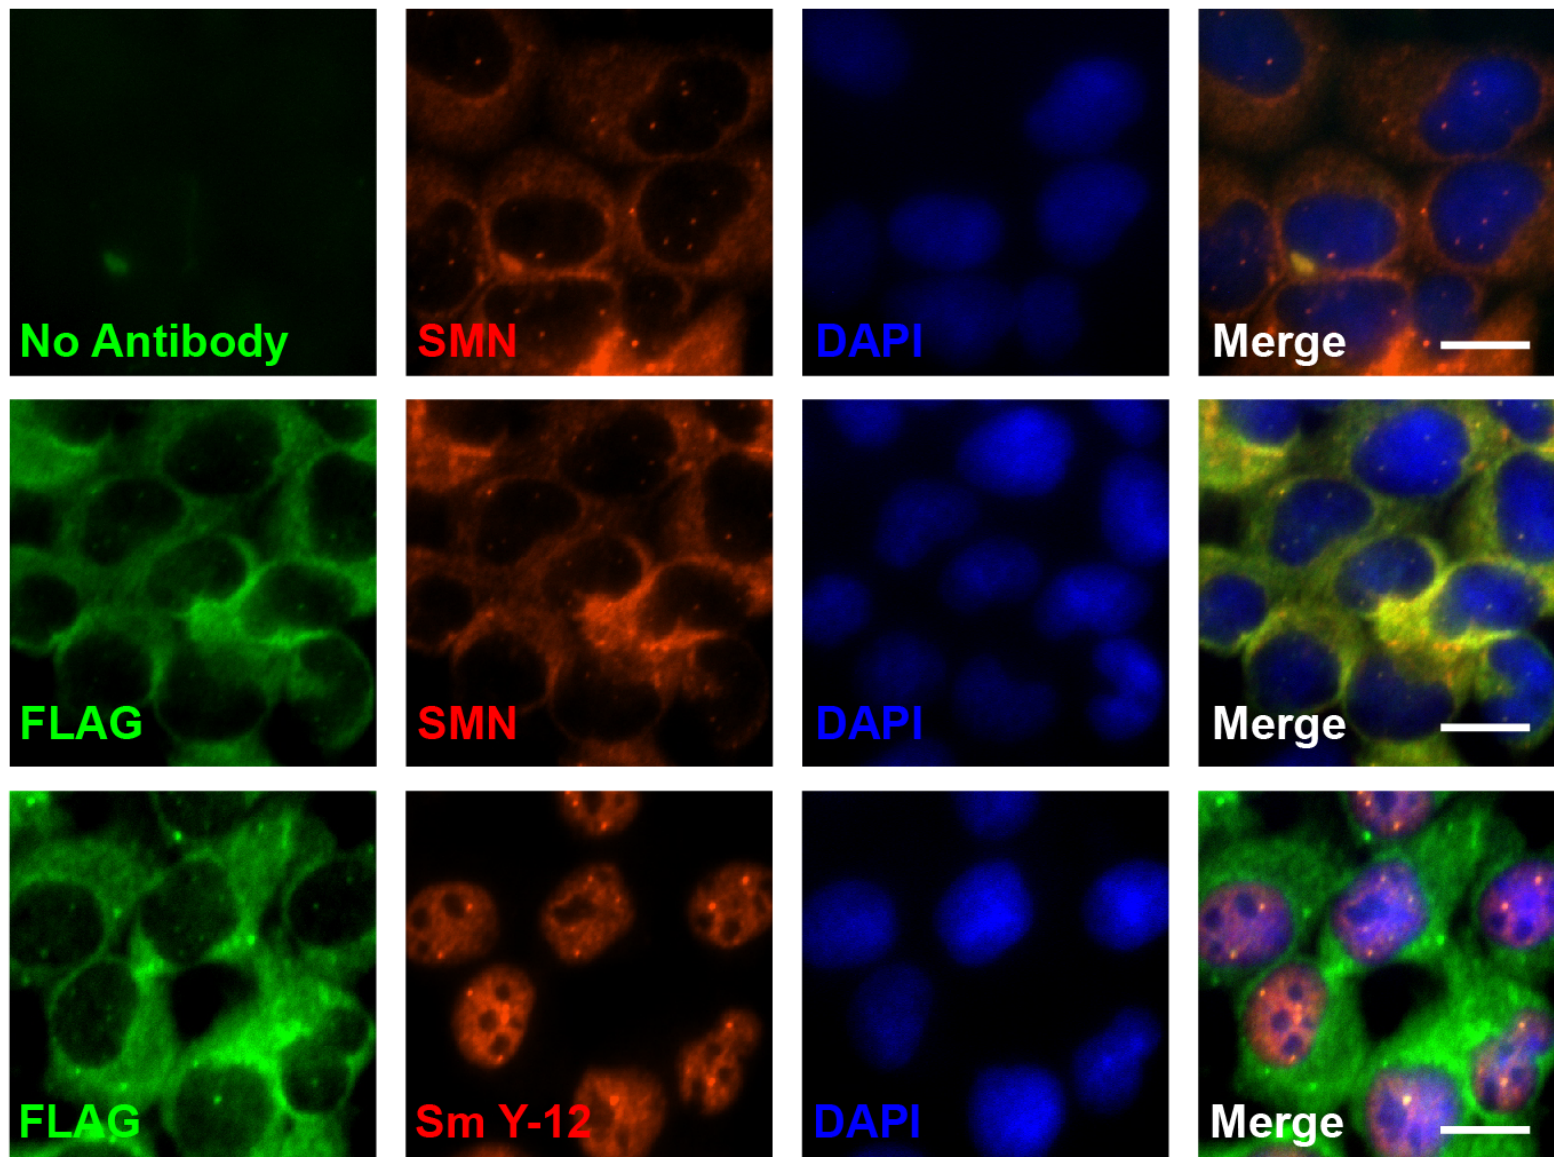

Figure S1B

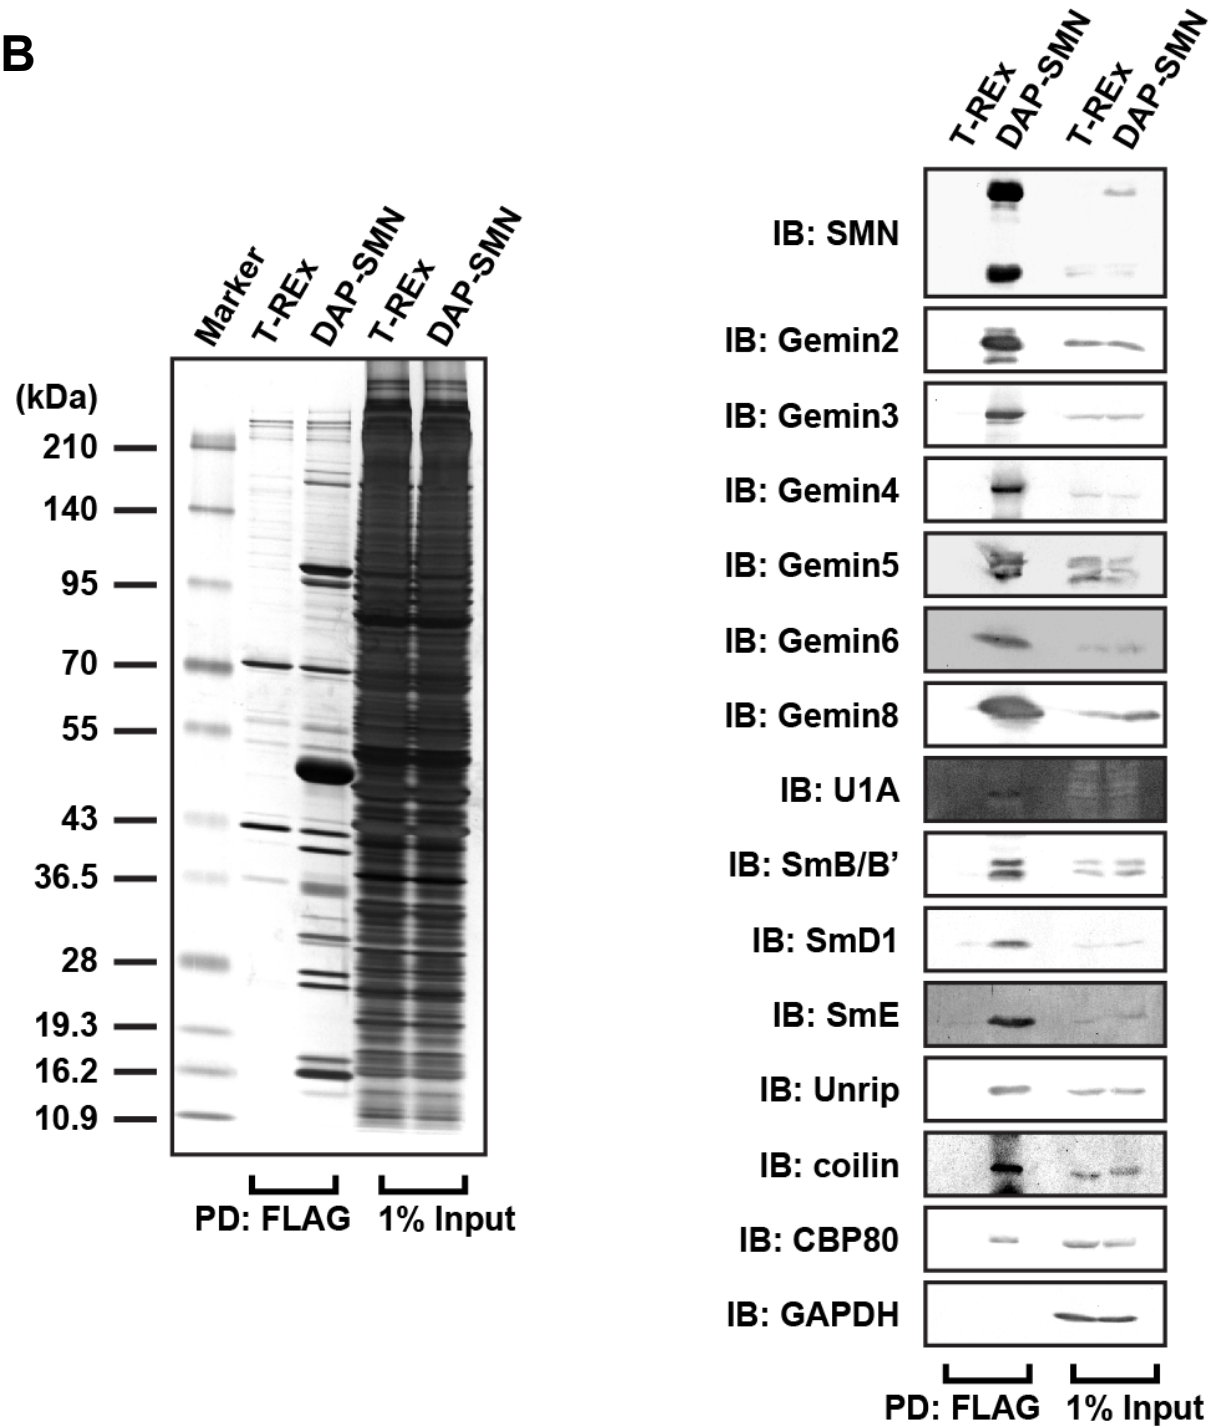

Figure S2A

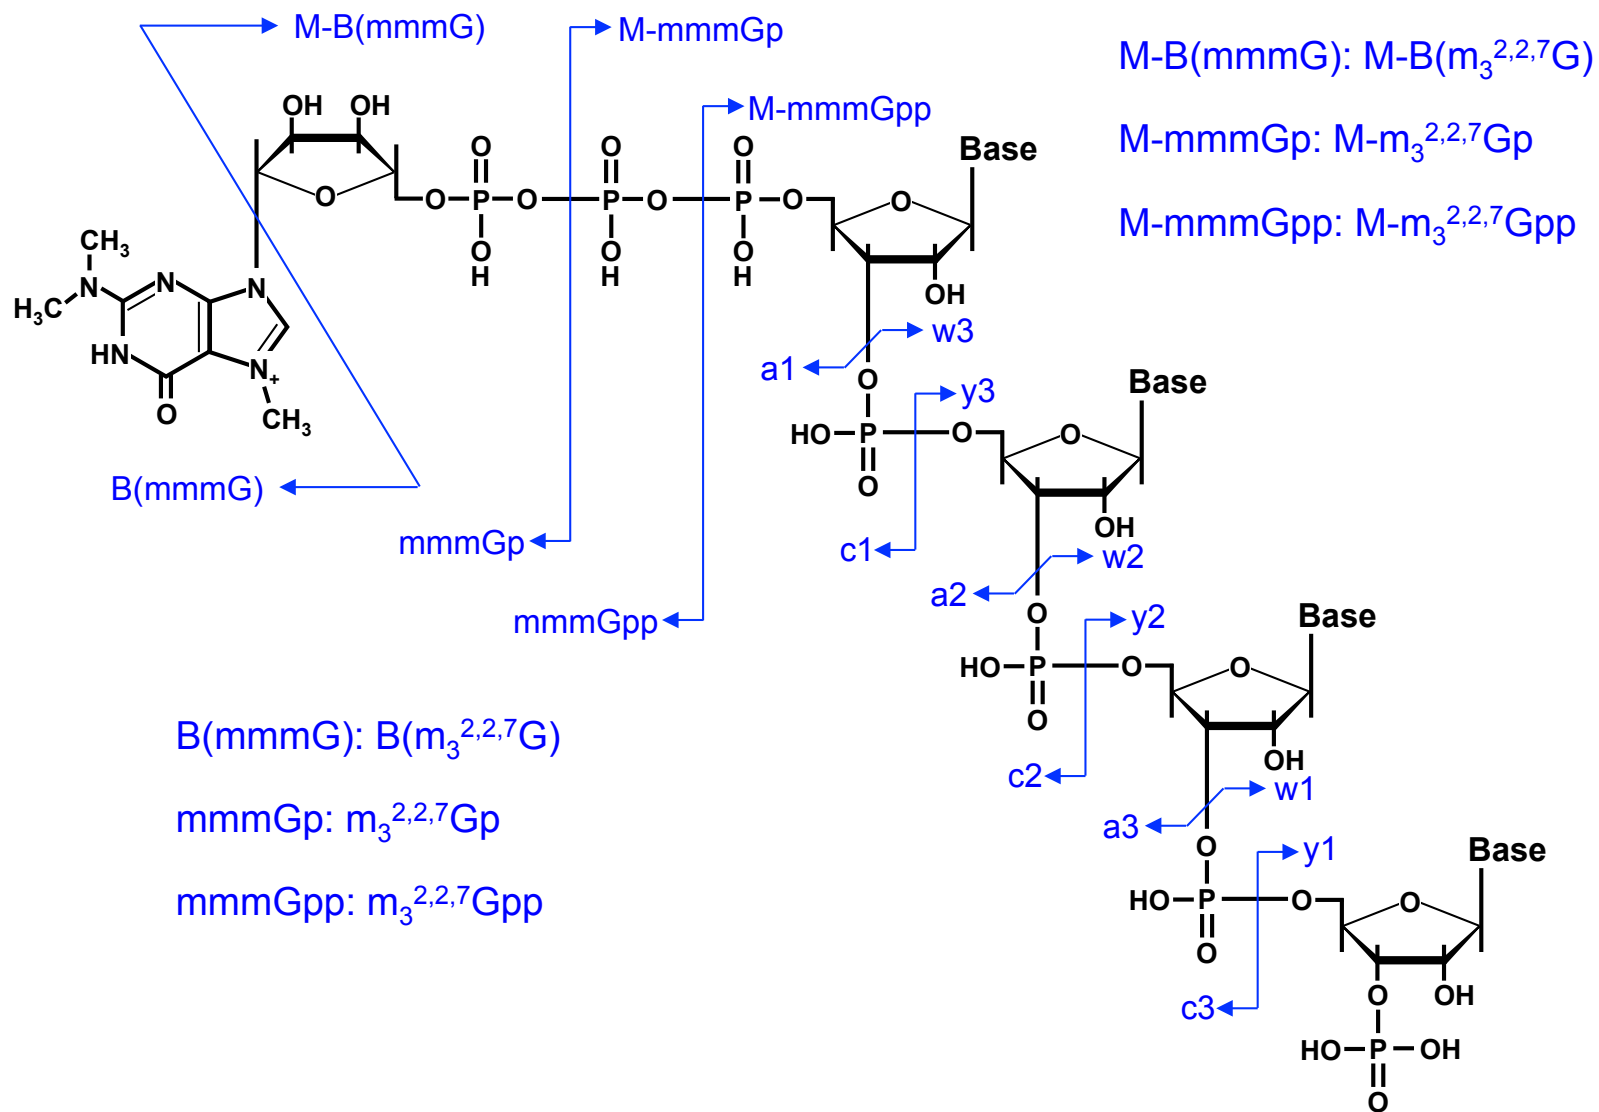

Figure S2B

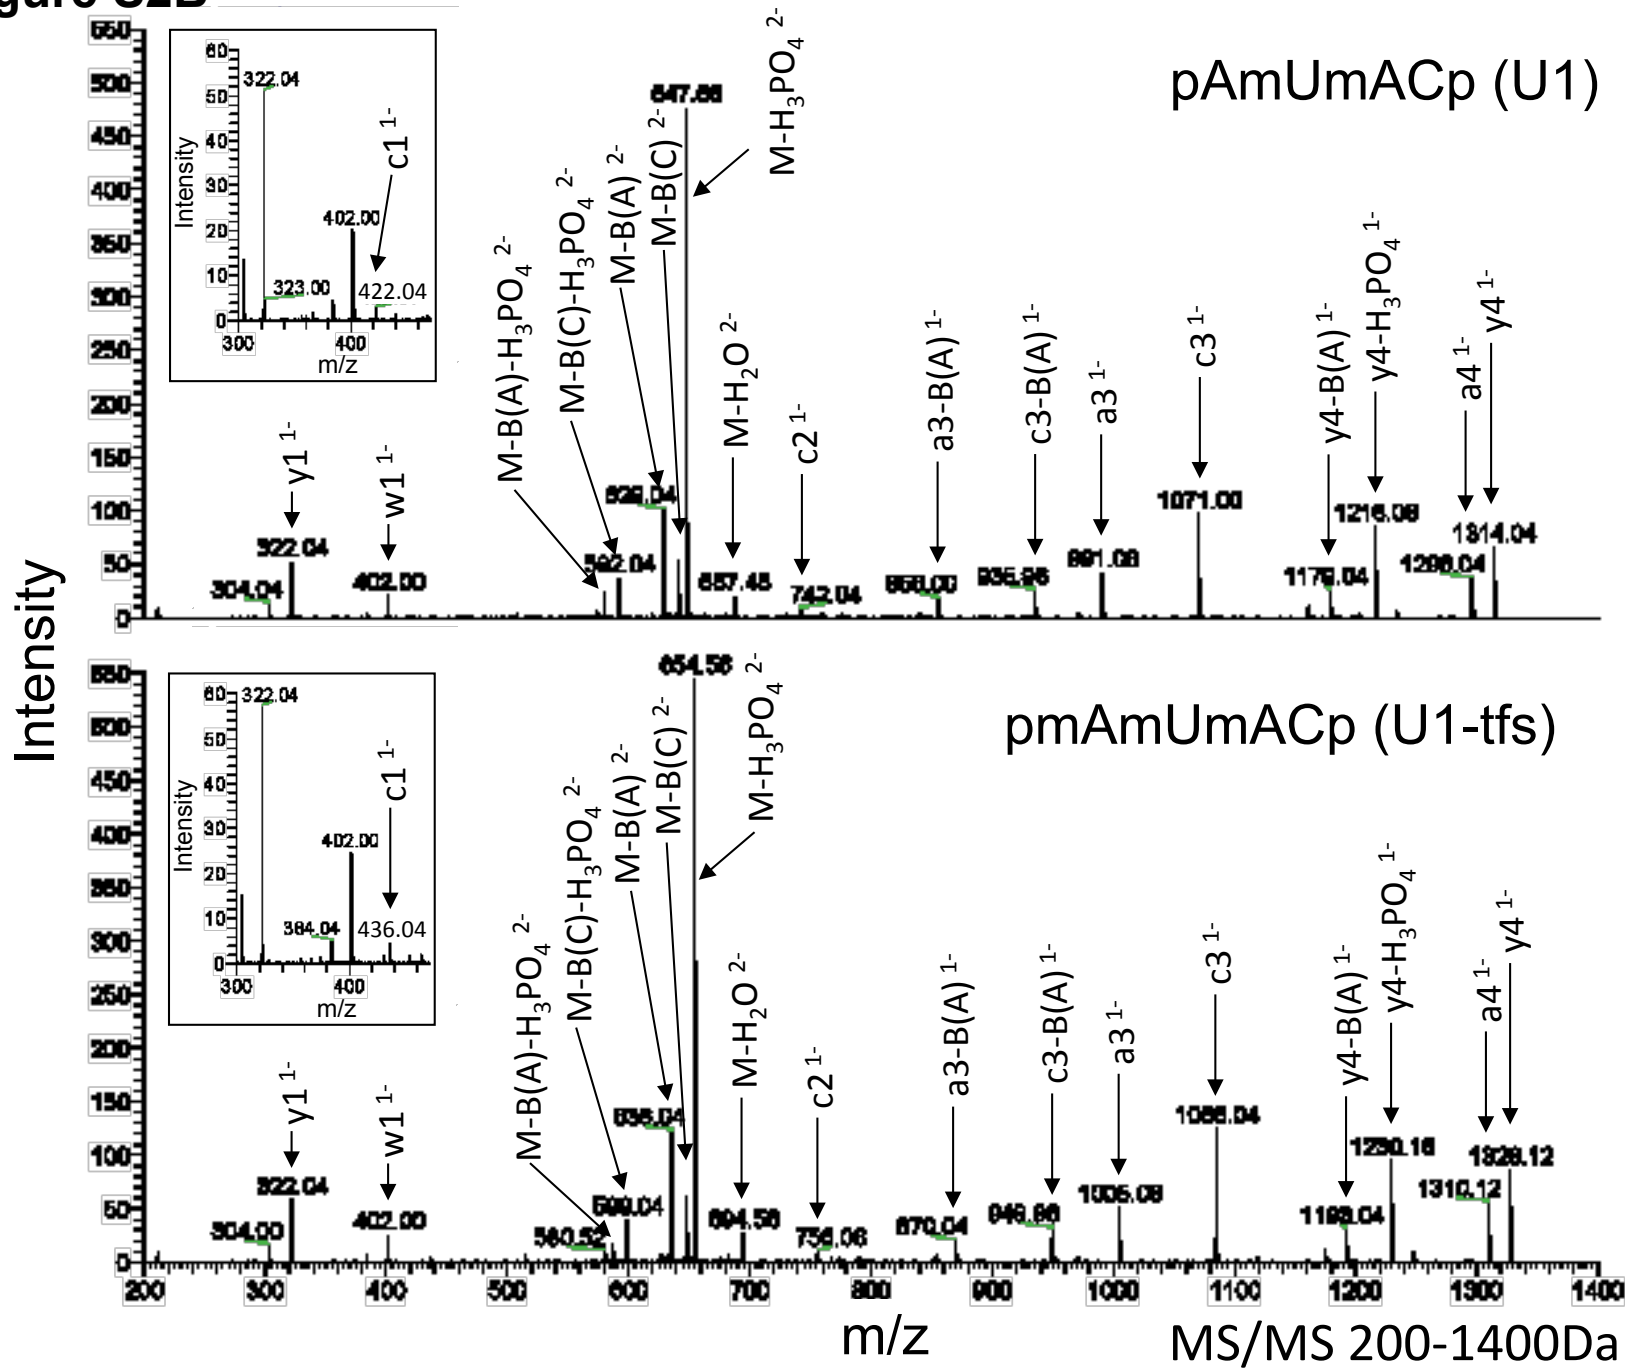

Figure S2C

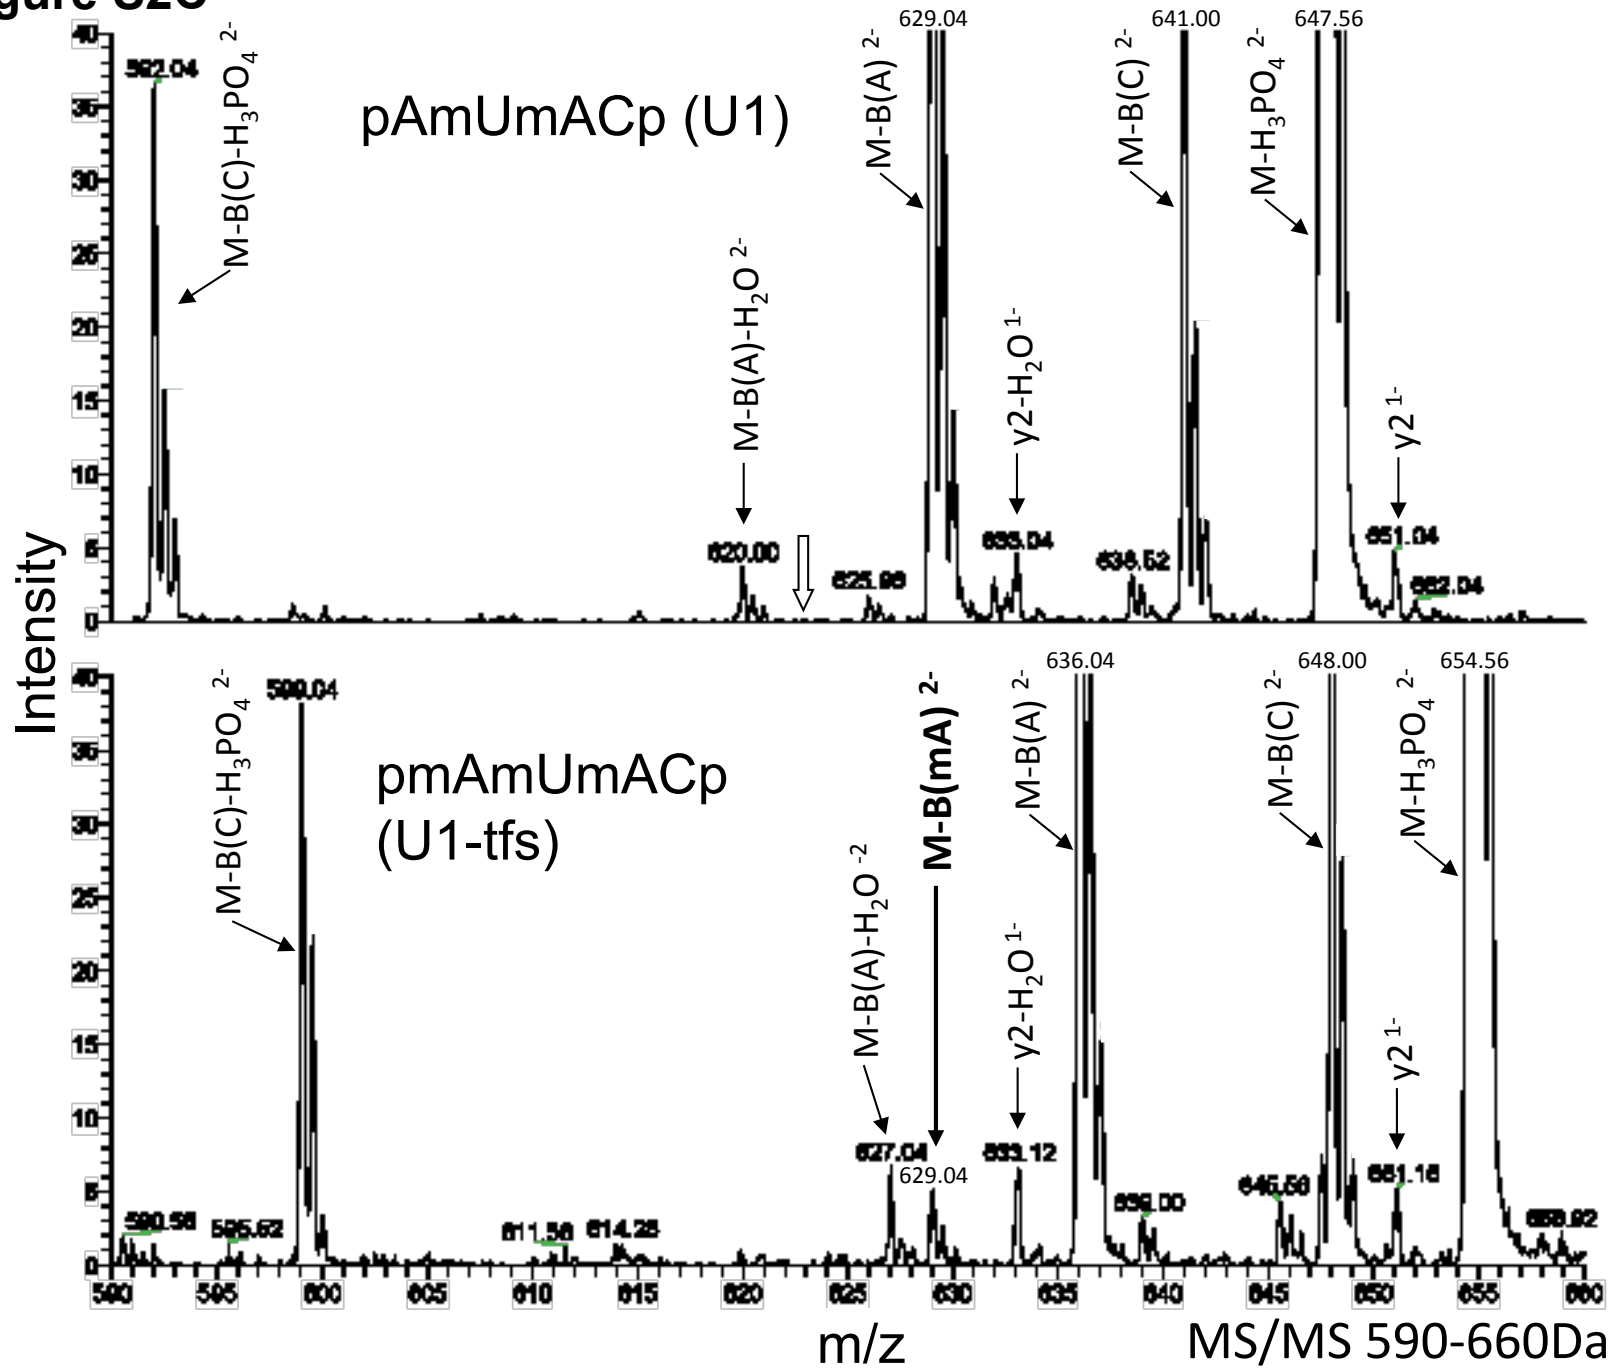

Figure S2D

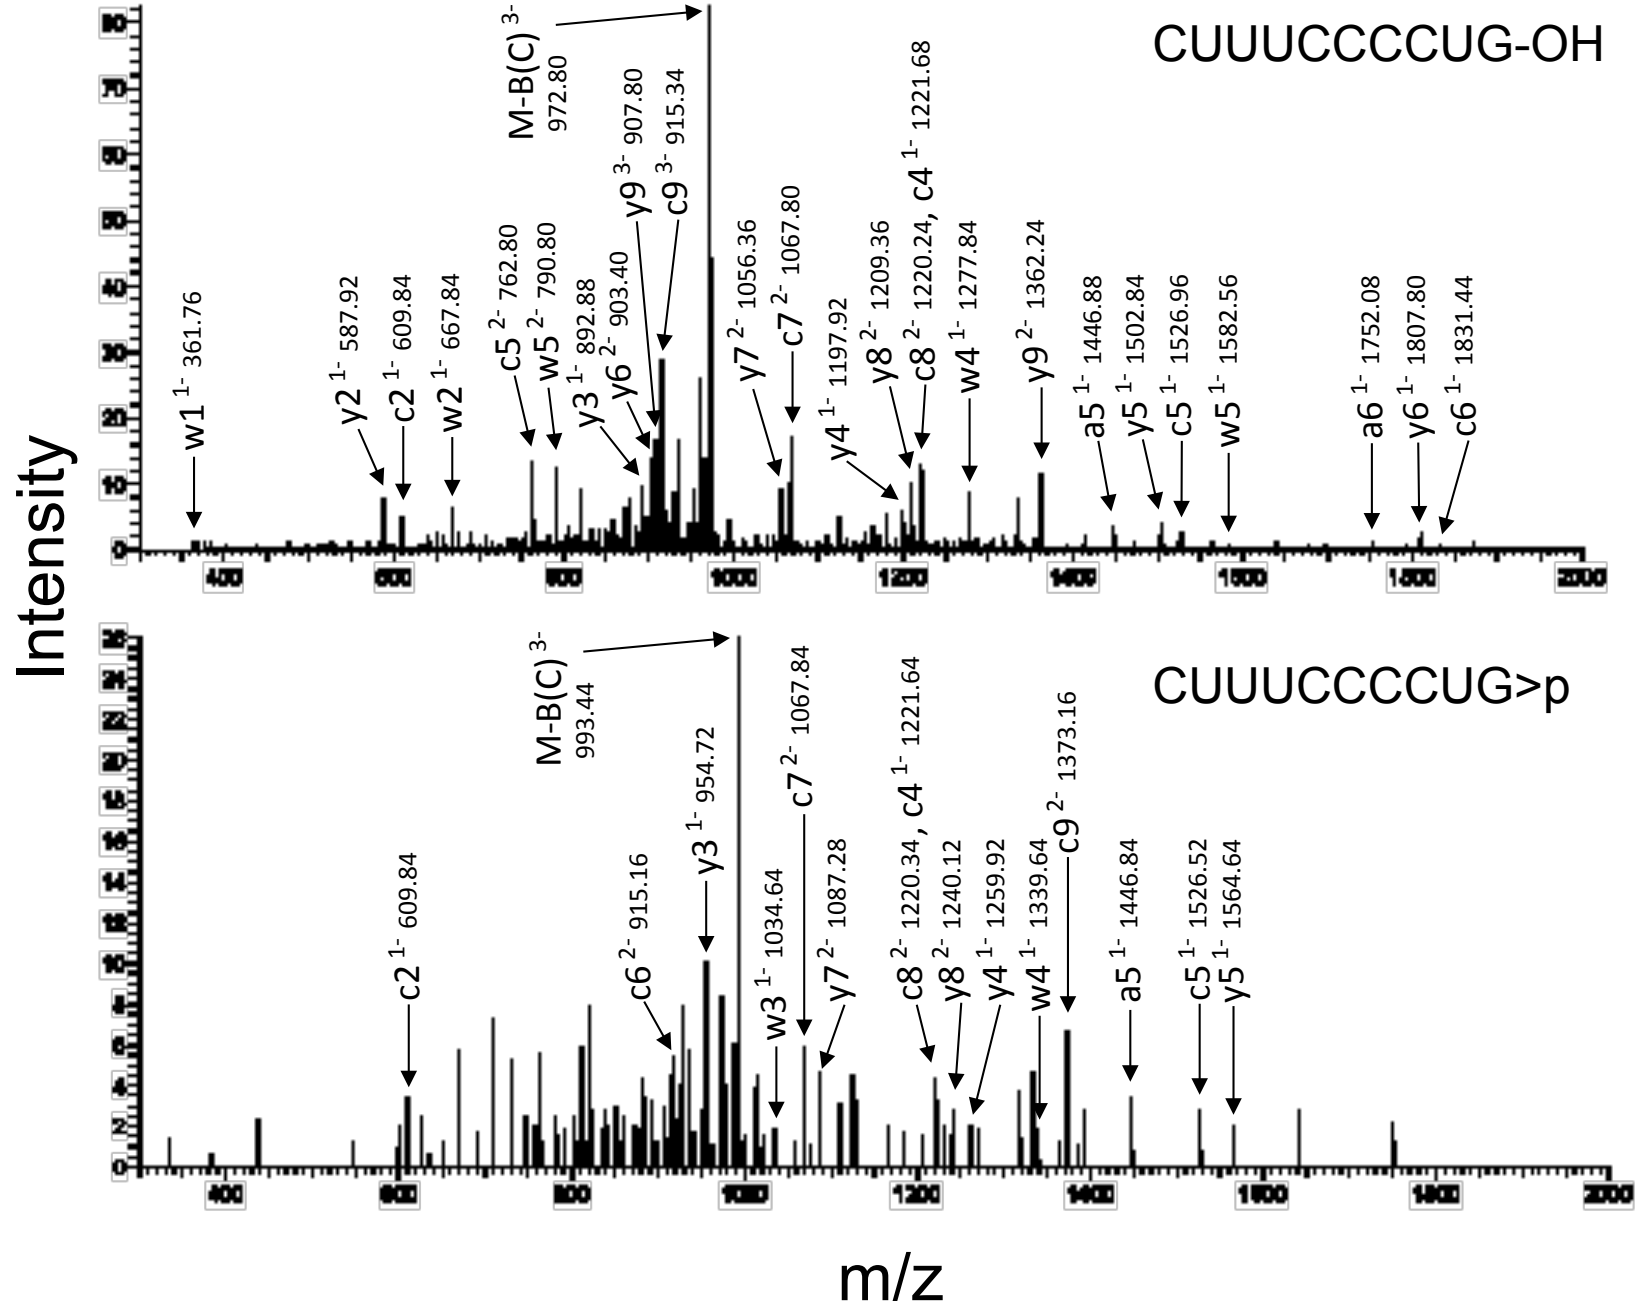



Figure S2E

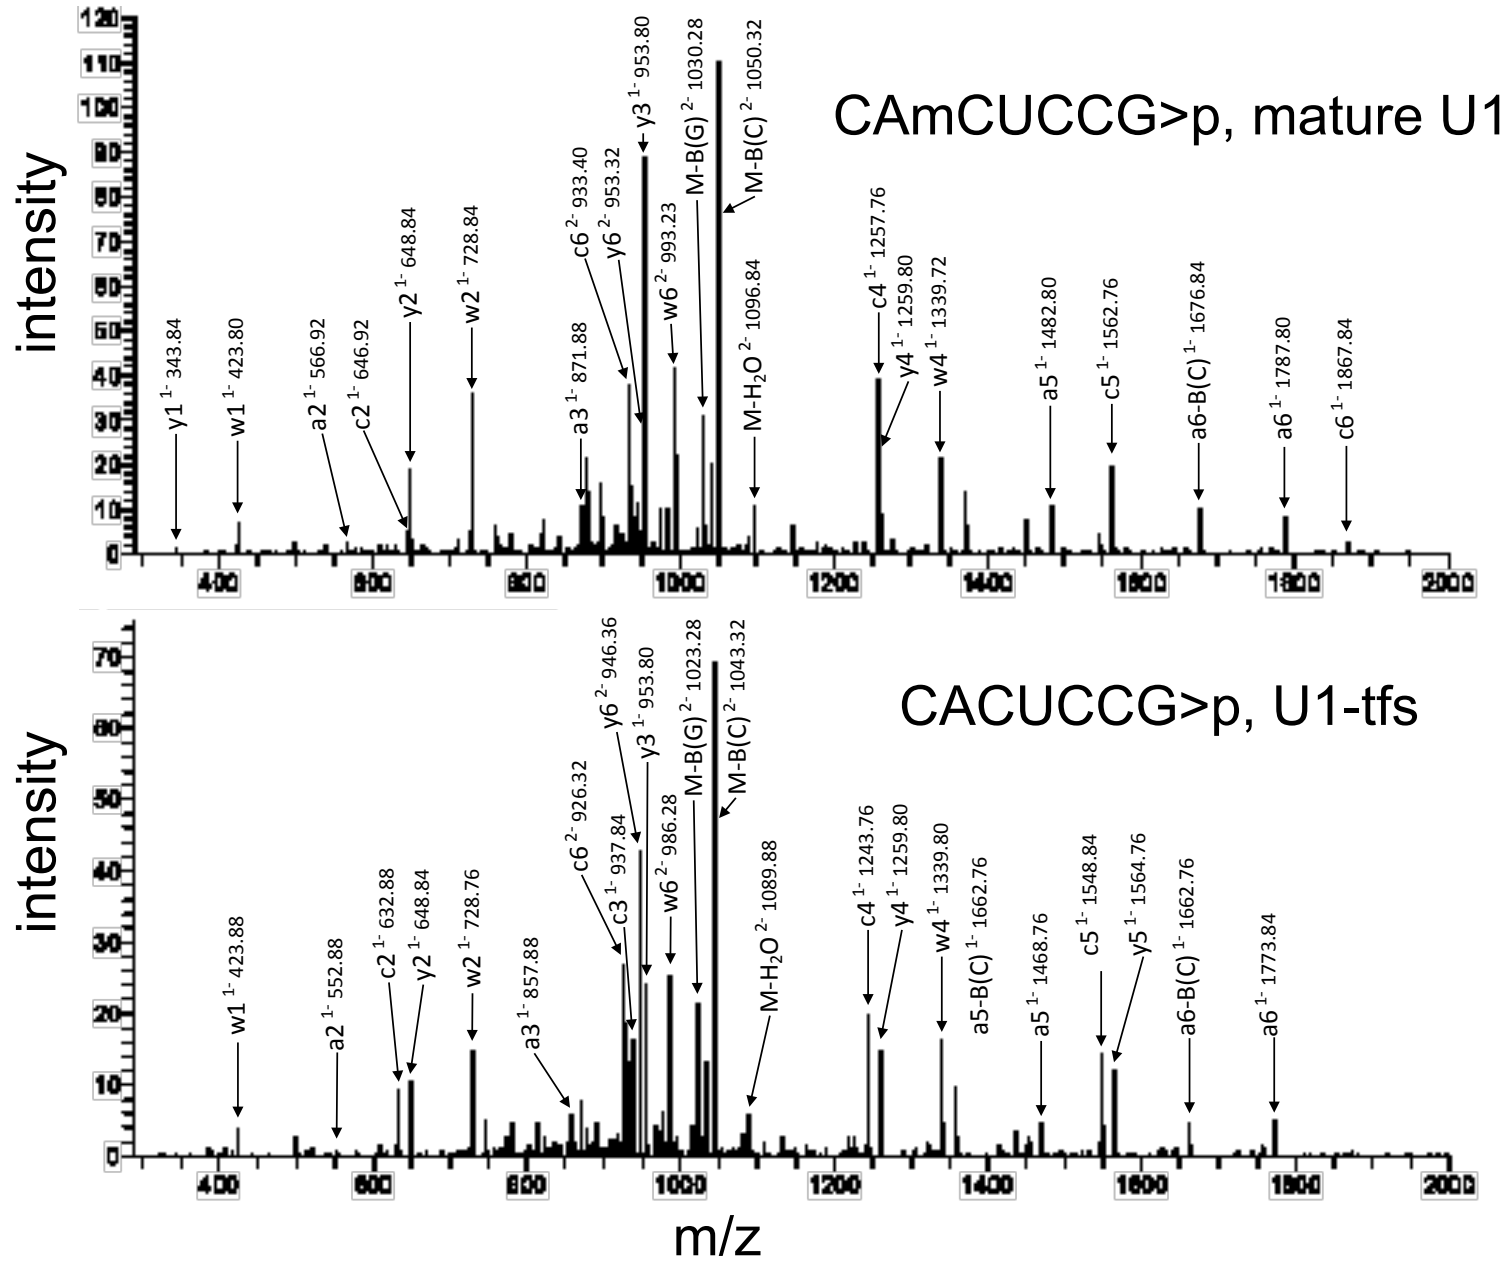

Figure S2F

U1 snRNA

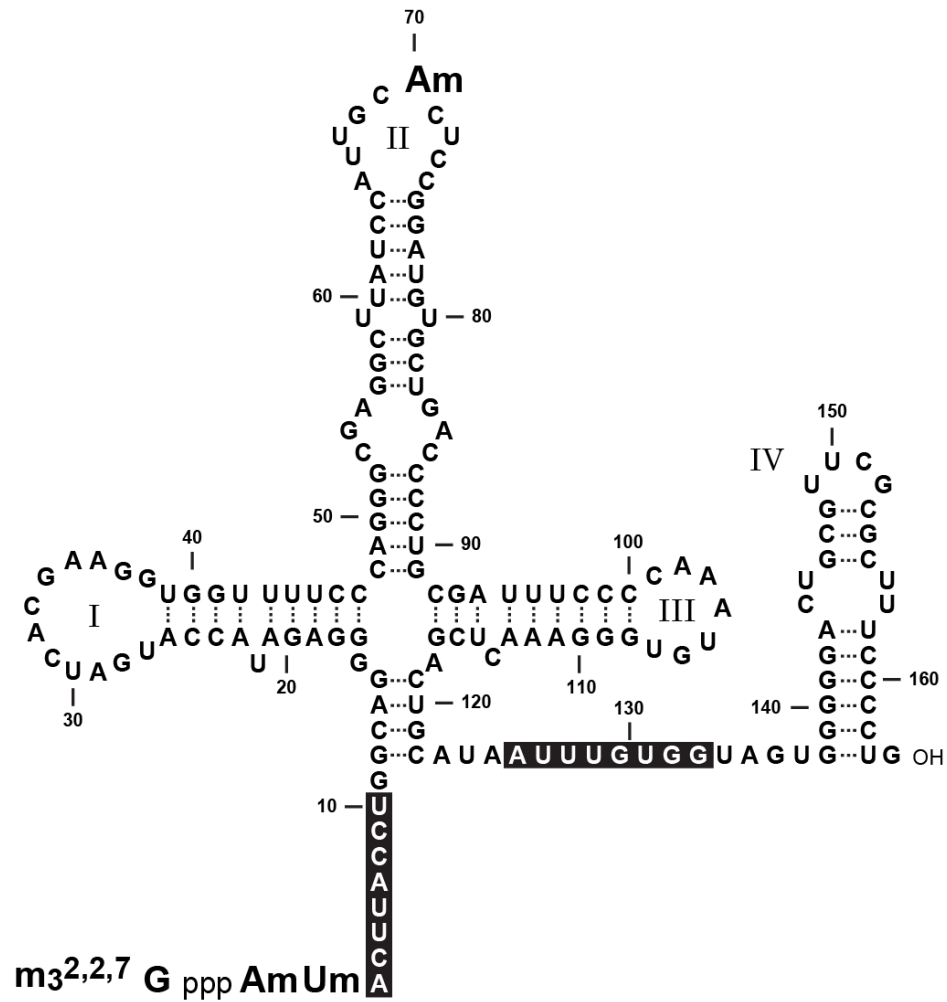

U1-tfs

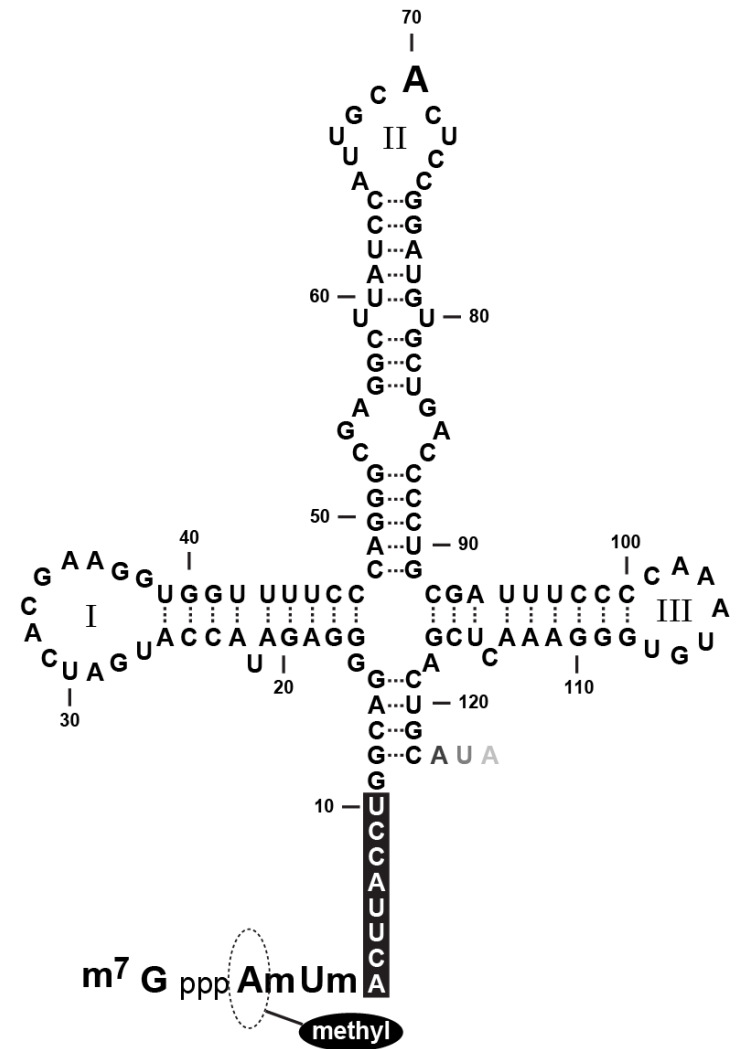

Figure S3

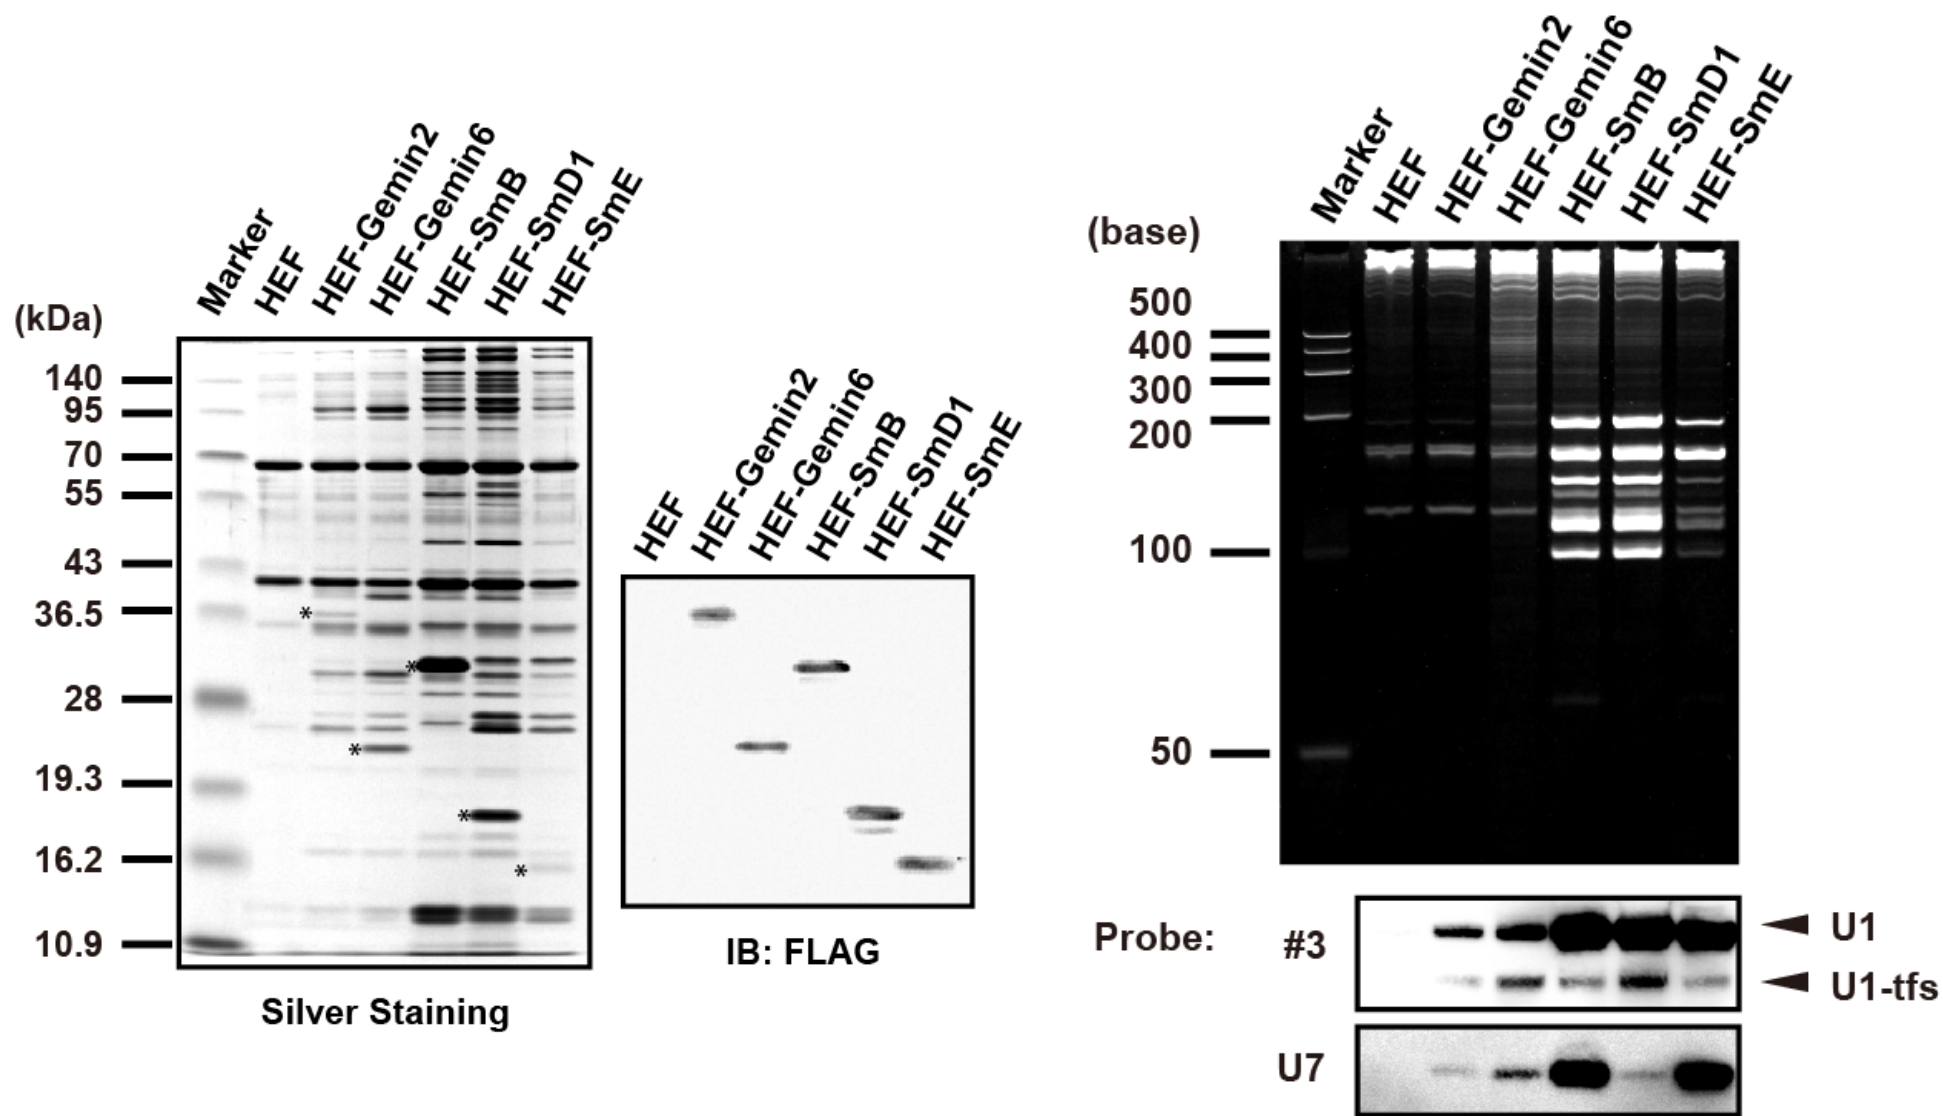

**Figure S4A**

**Schematic diagram of exogenously express U1 vector**

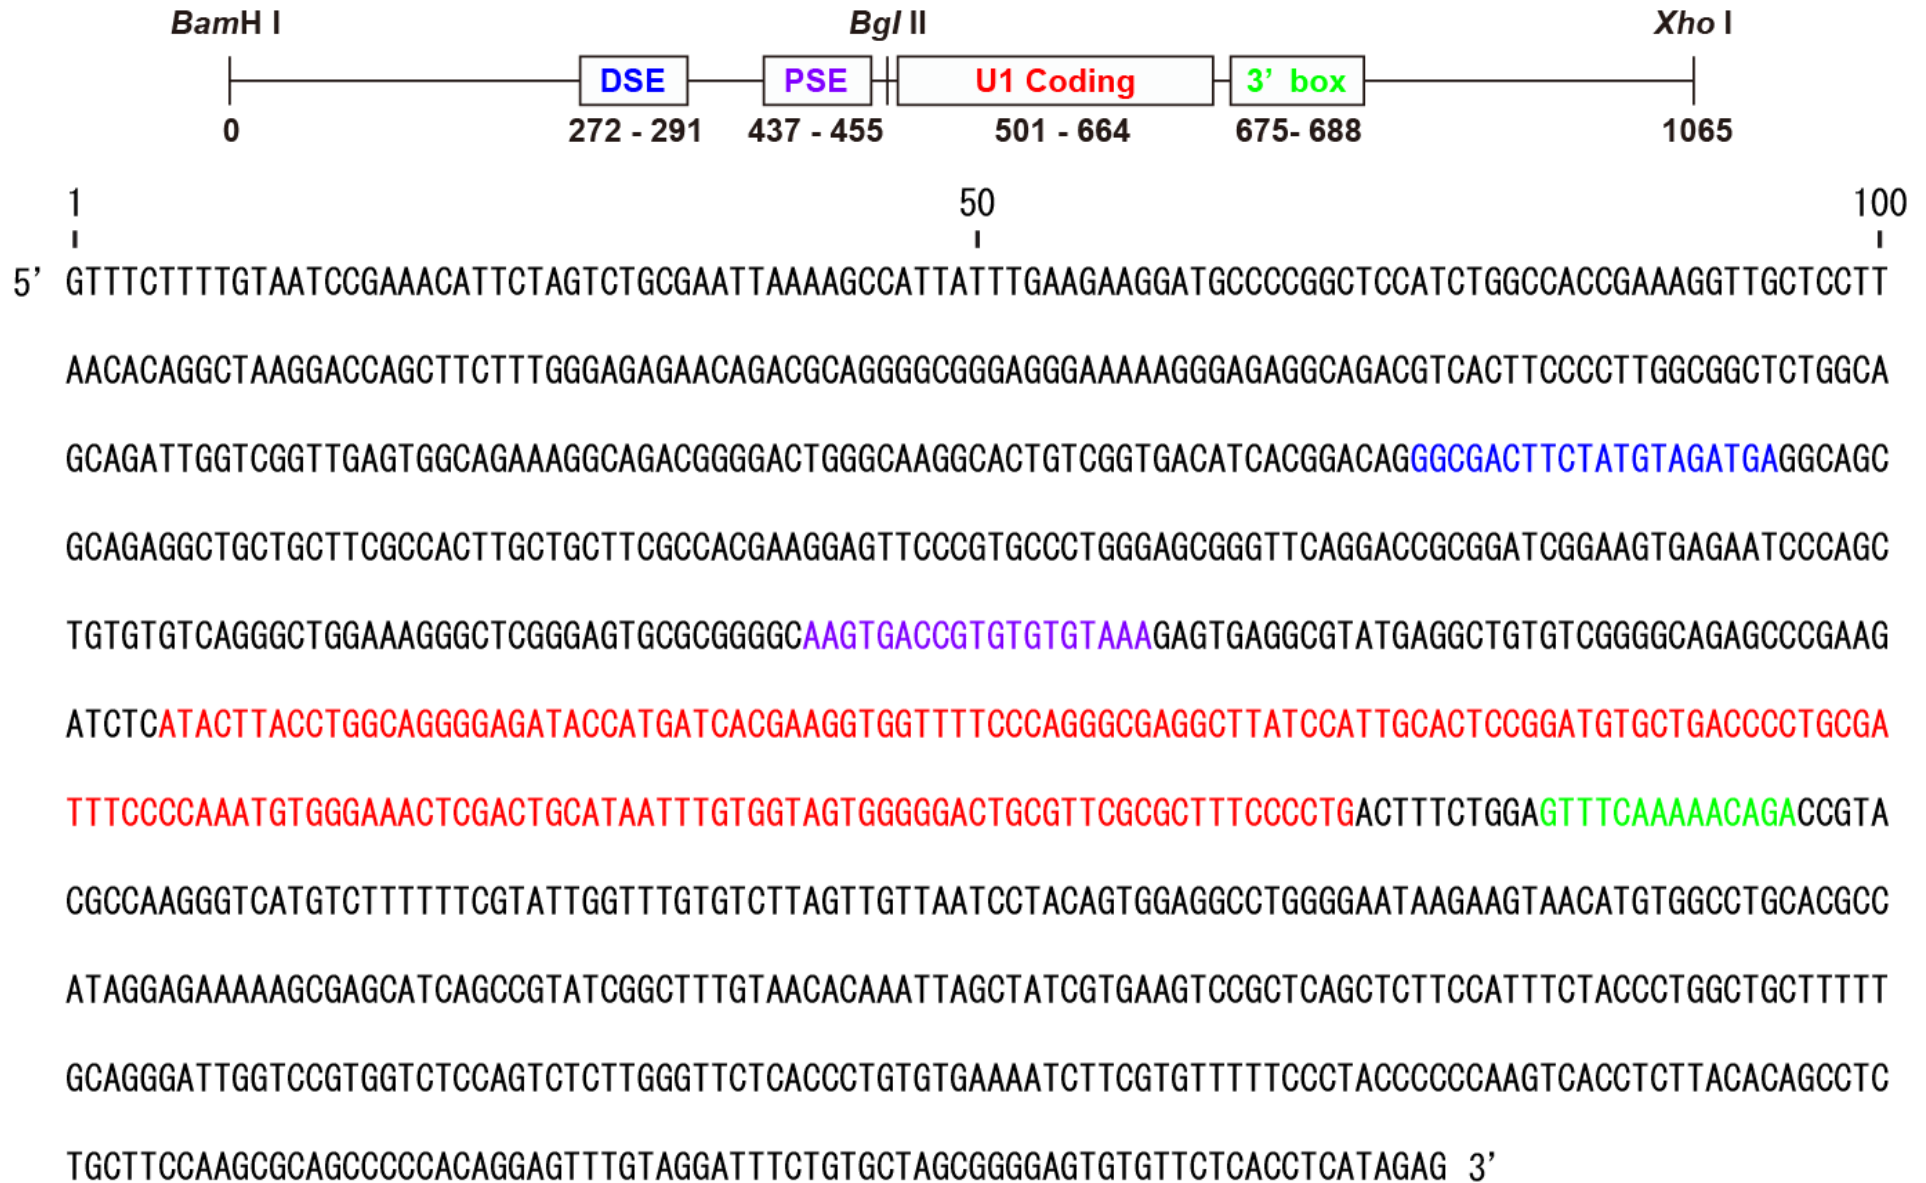

**Figure S4B**

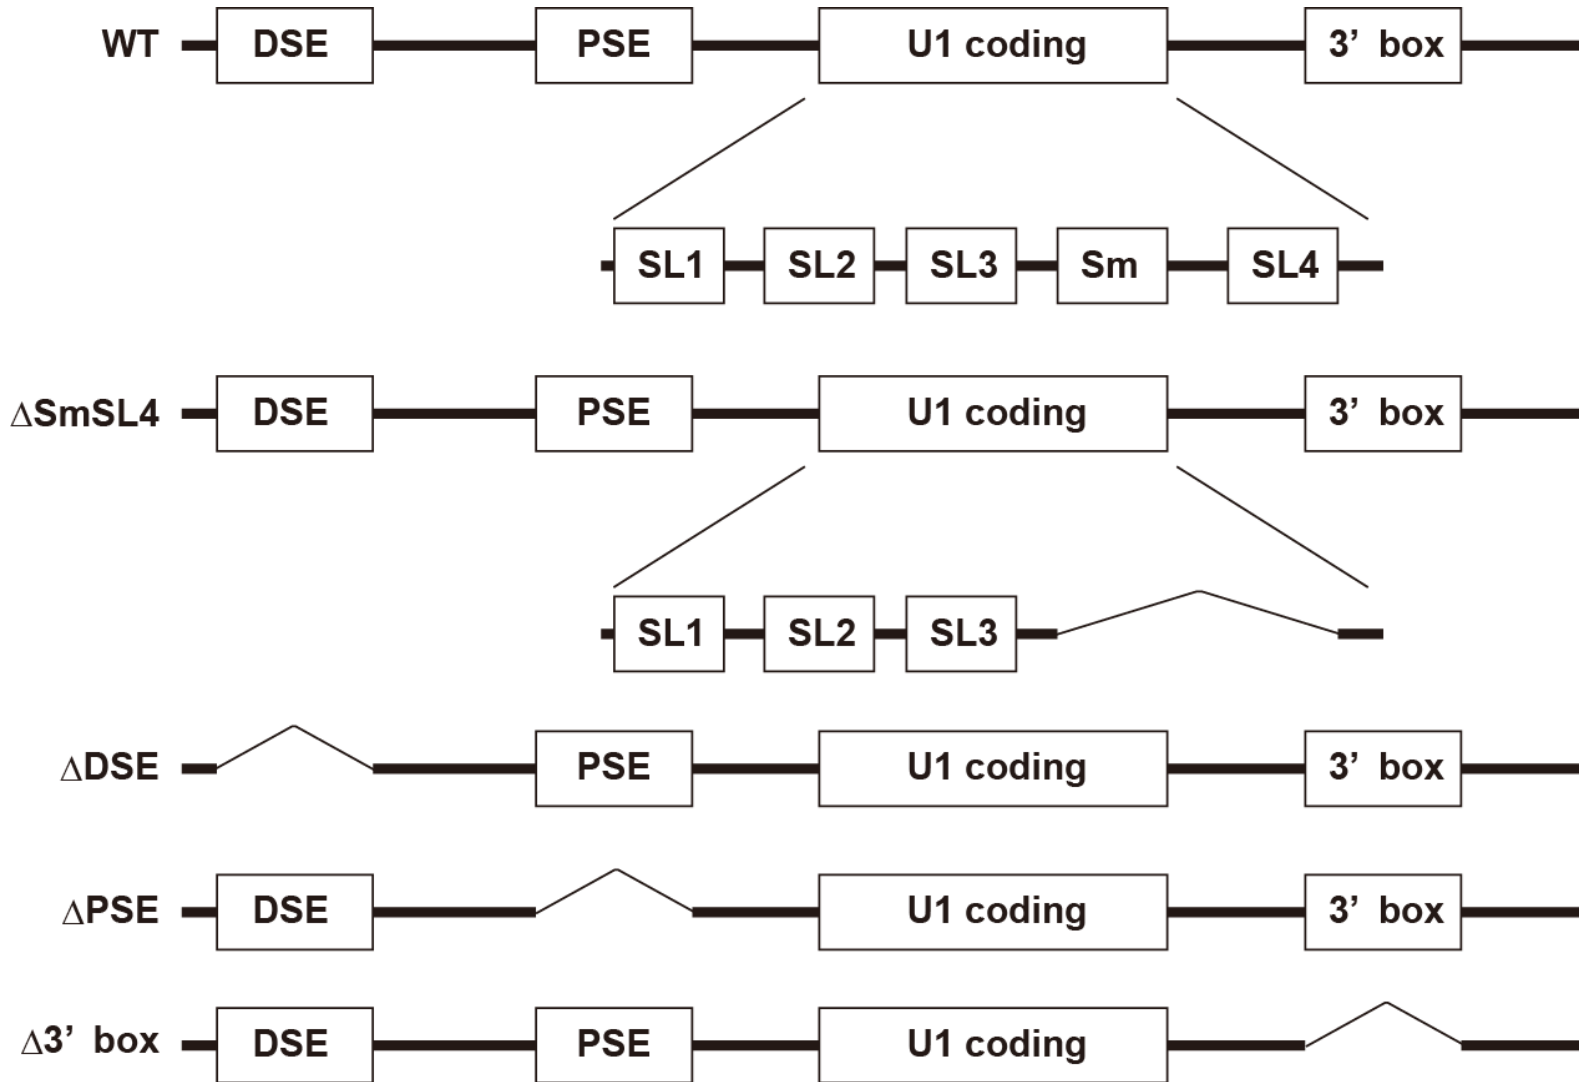

Figure S4C

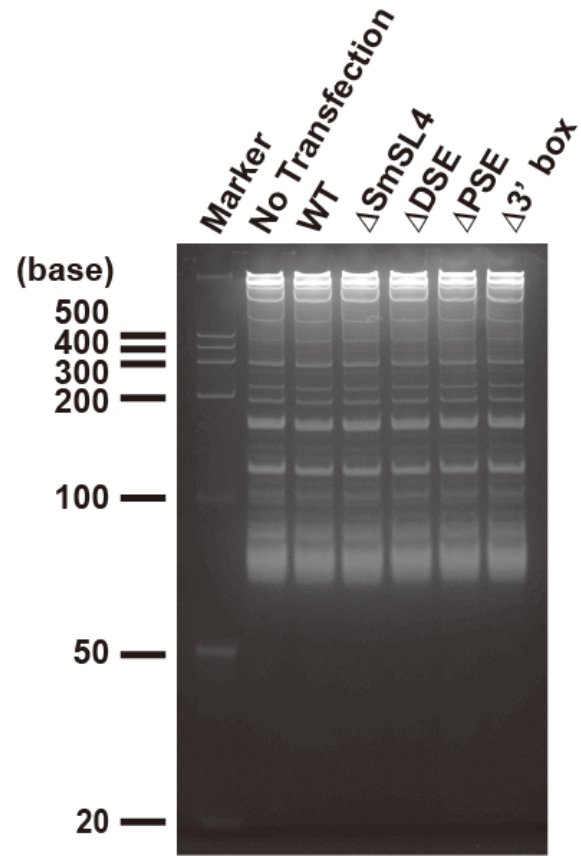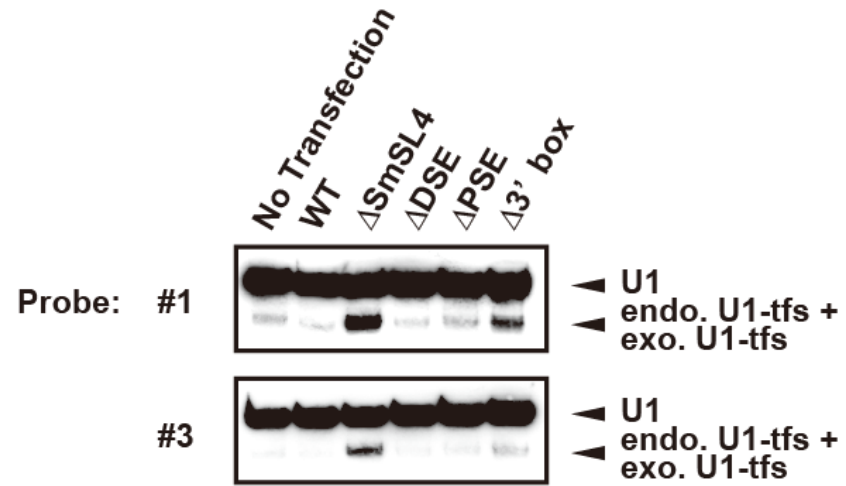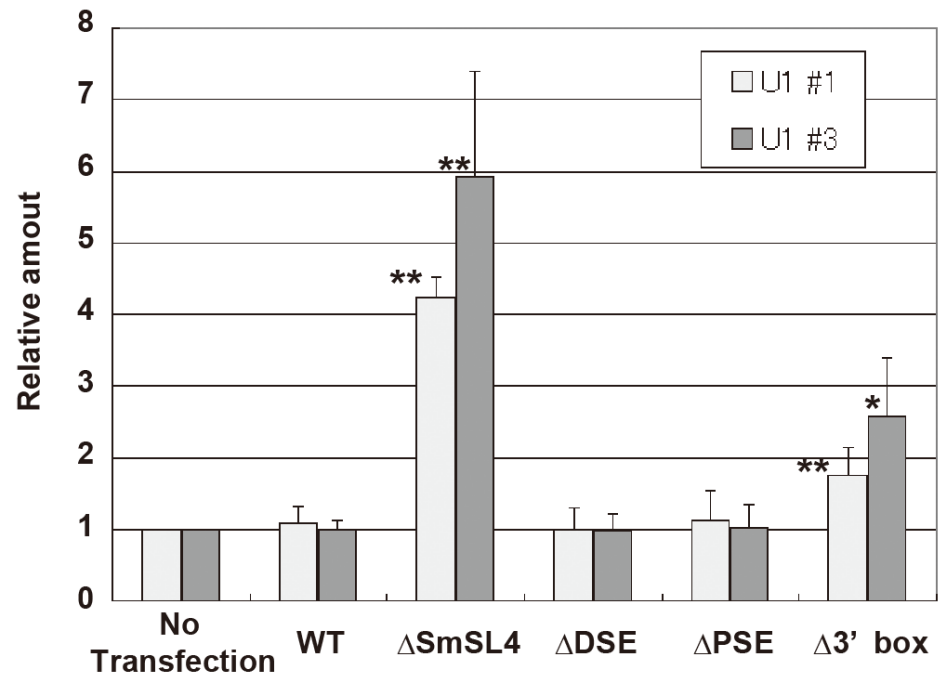

\*: p<0.1    \*\*: p<0.05

Figure S4D

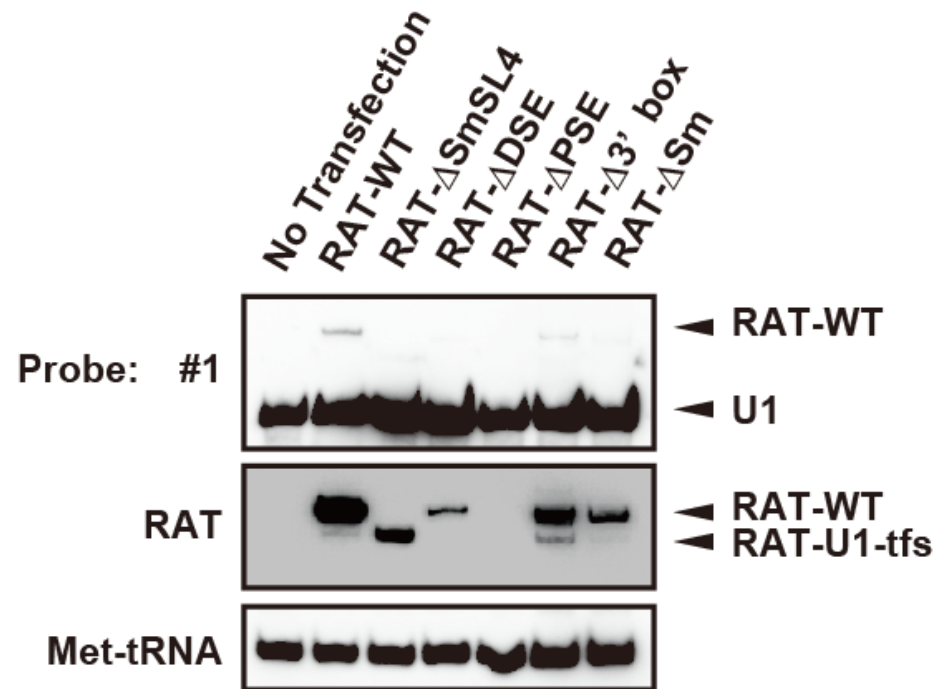

Figure S4E

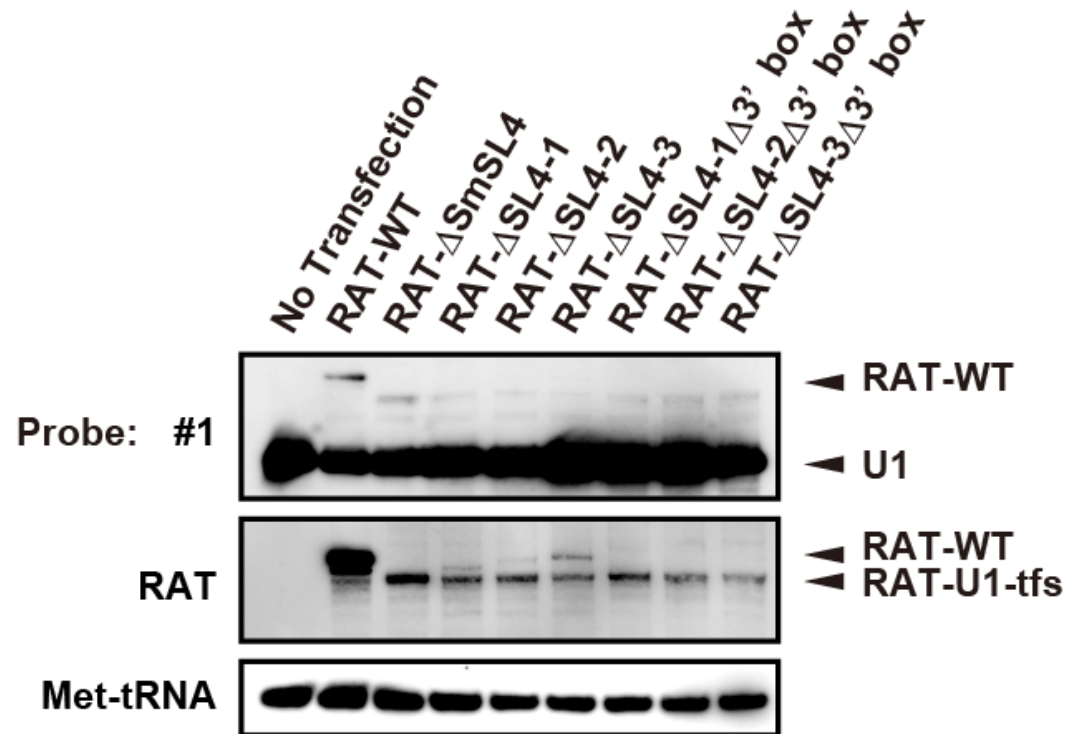



Figure S5A

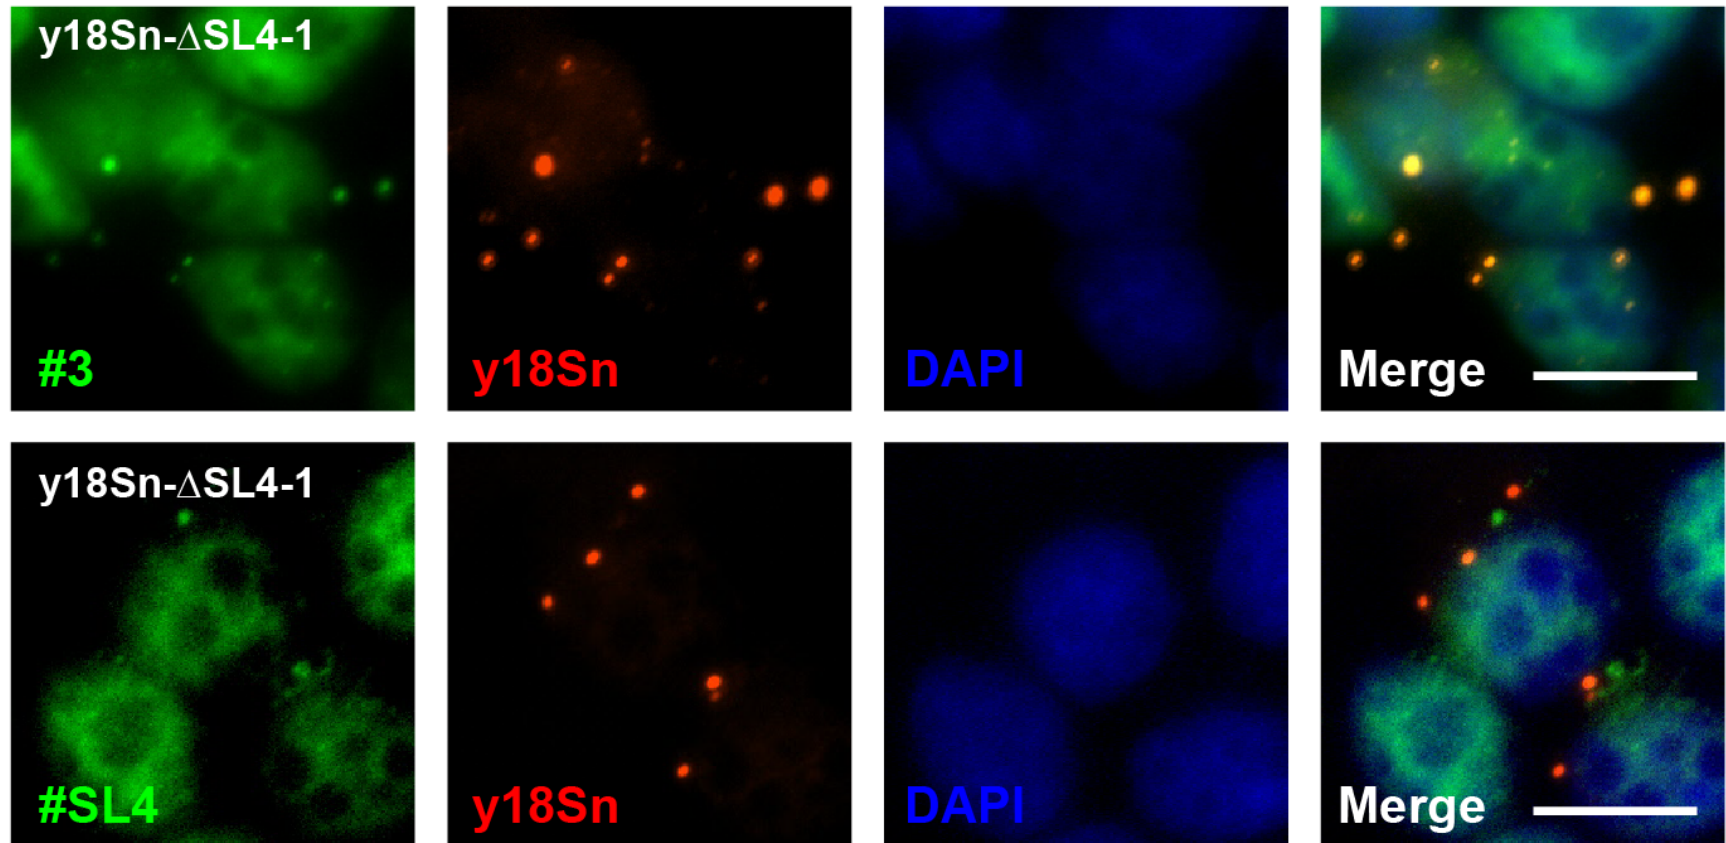

Figure S5B

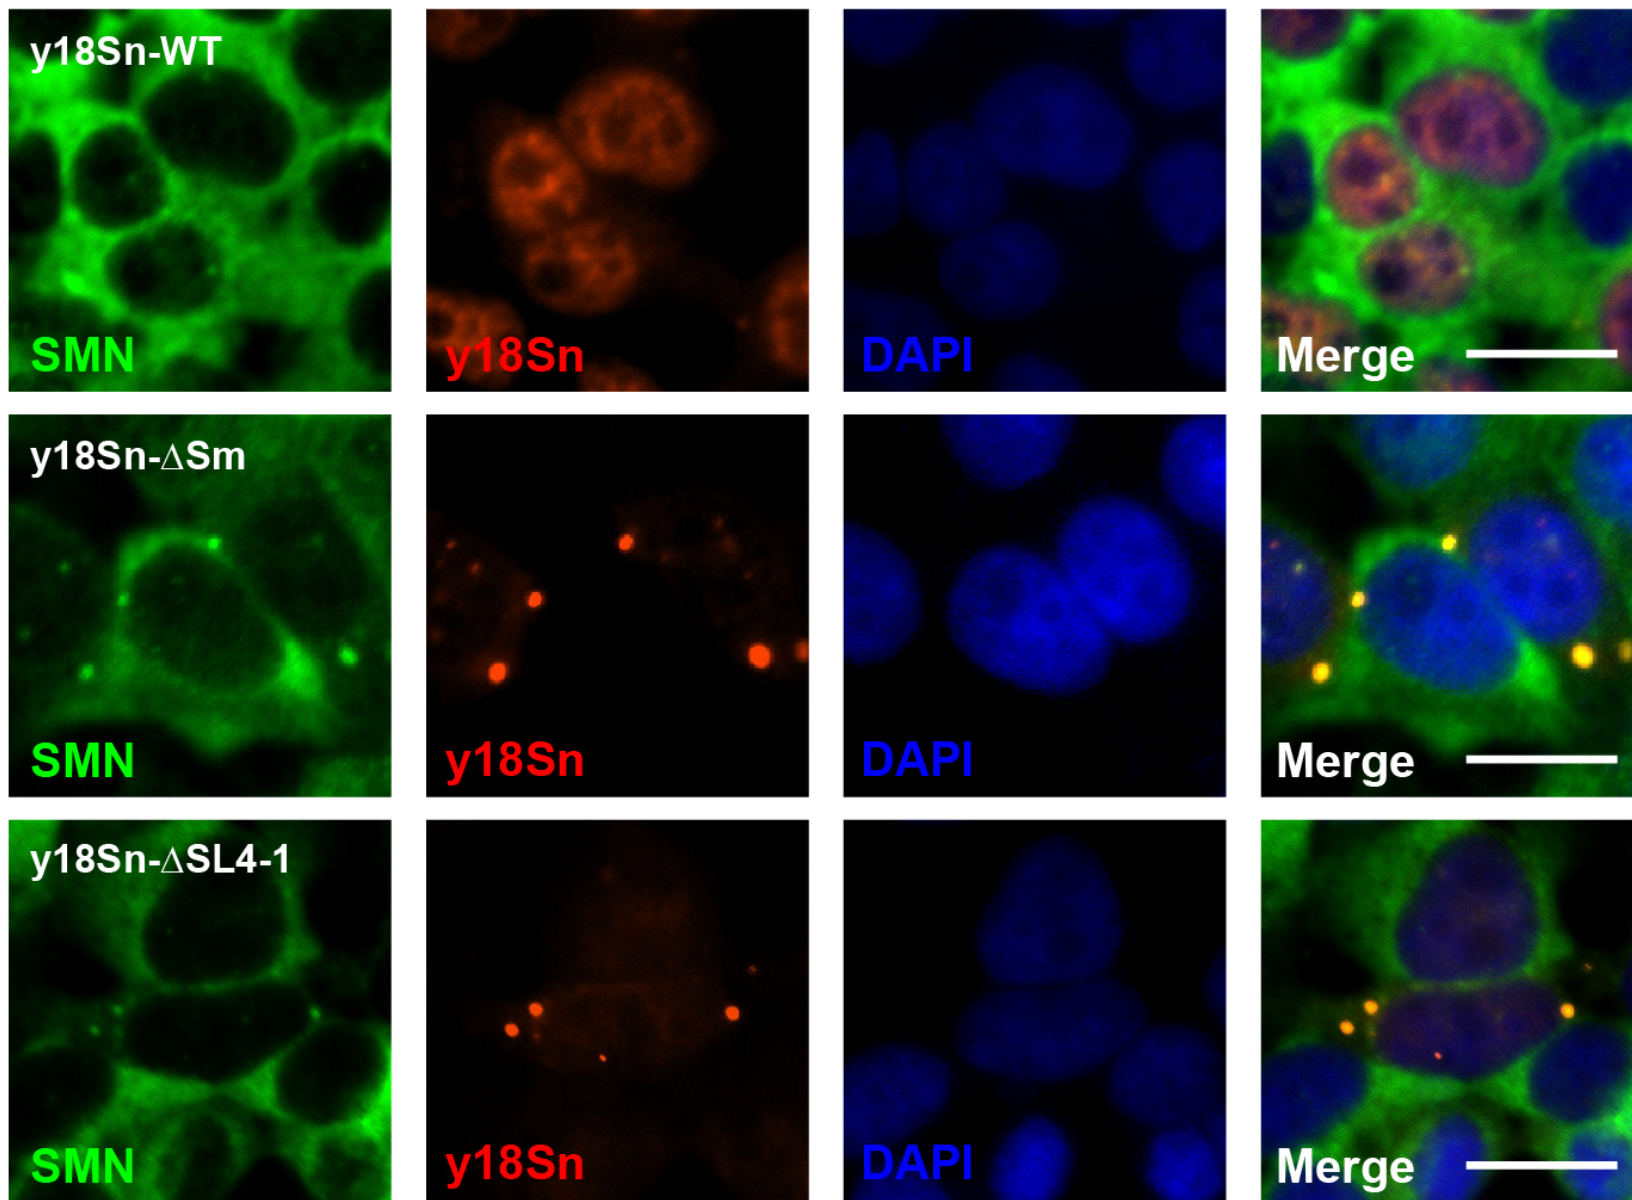

Figure S5C

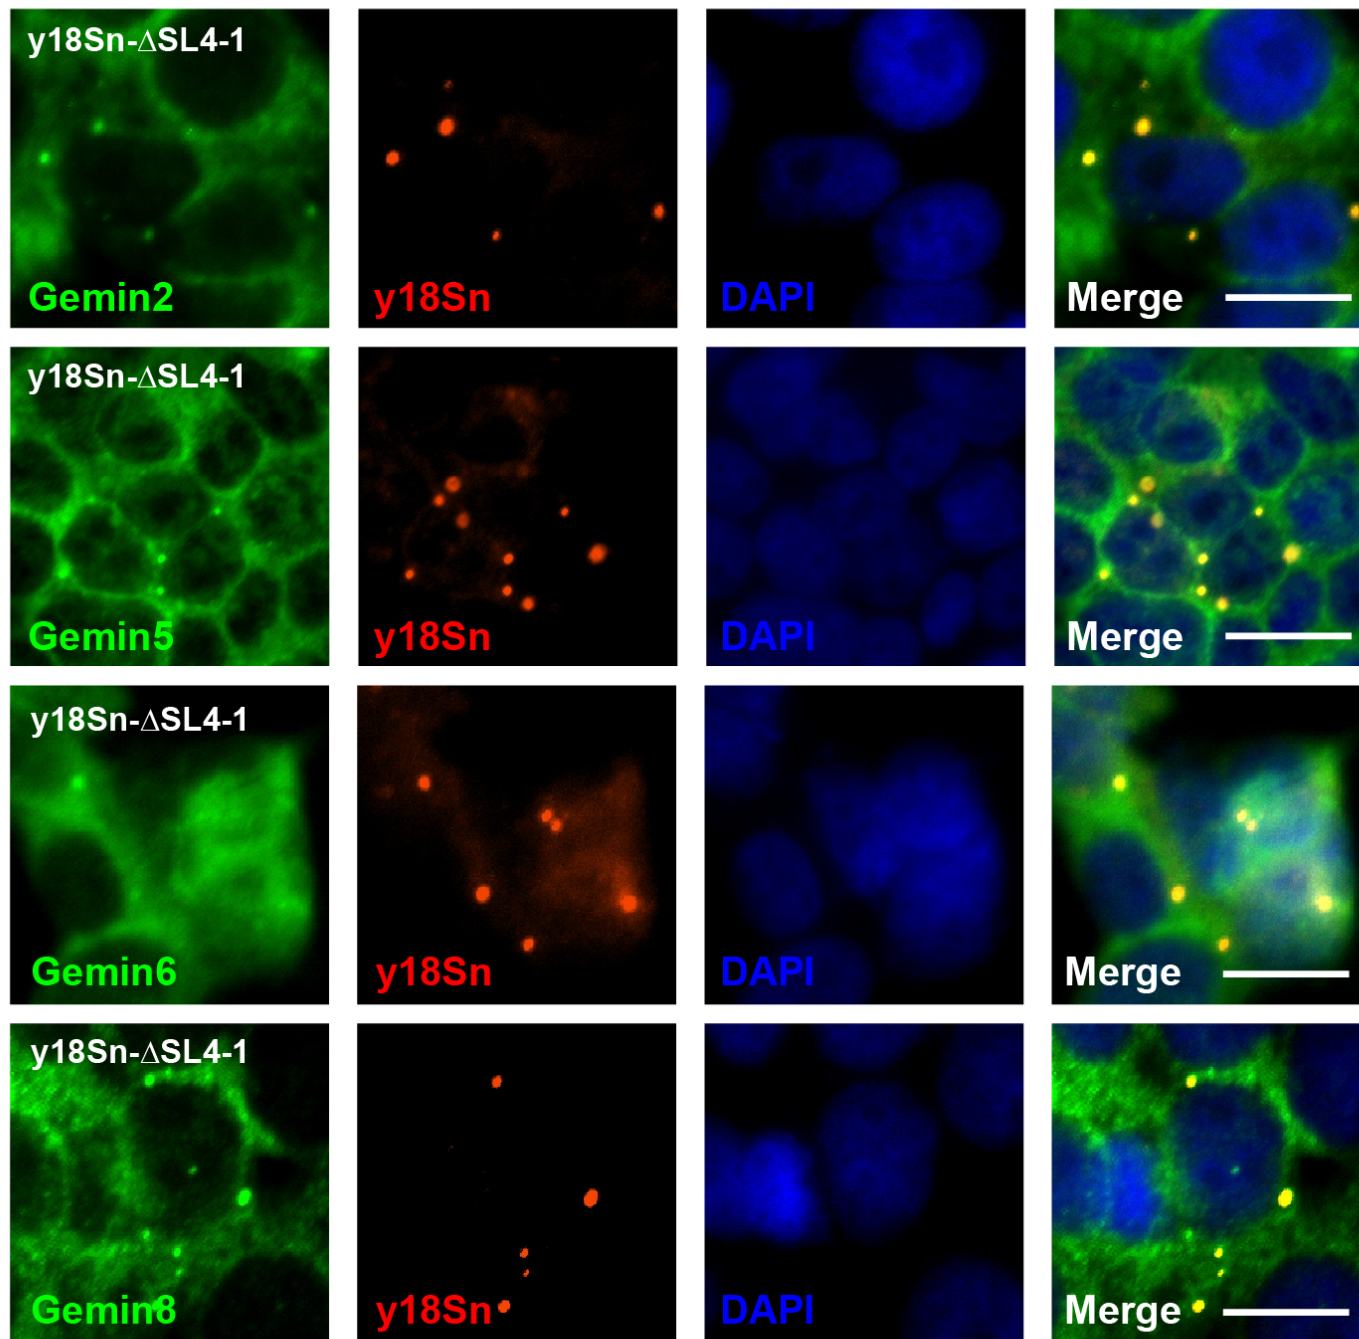



Figure S6A

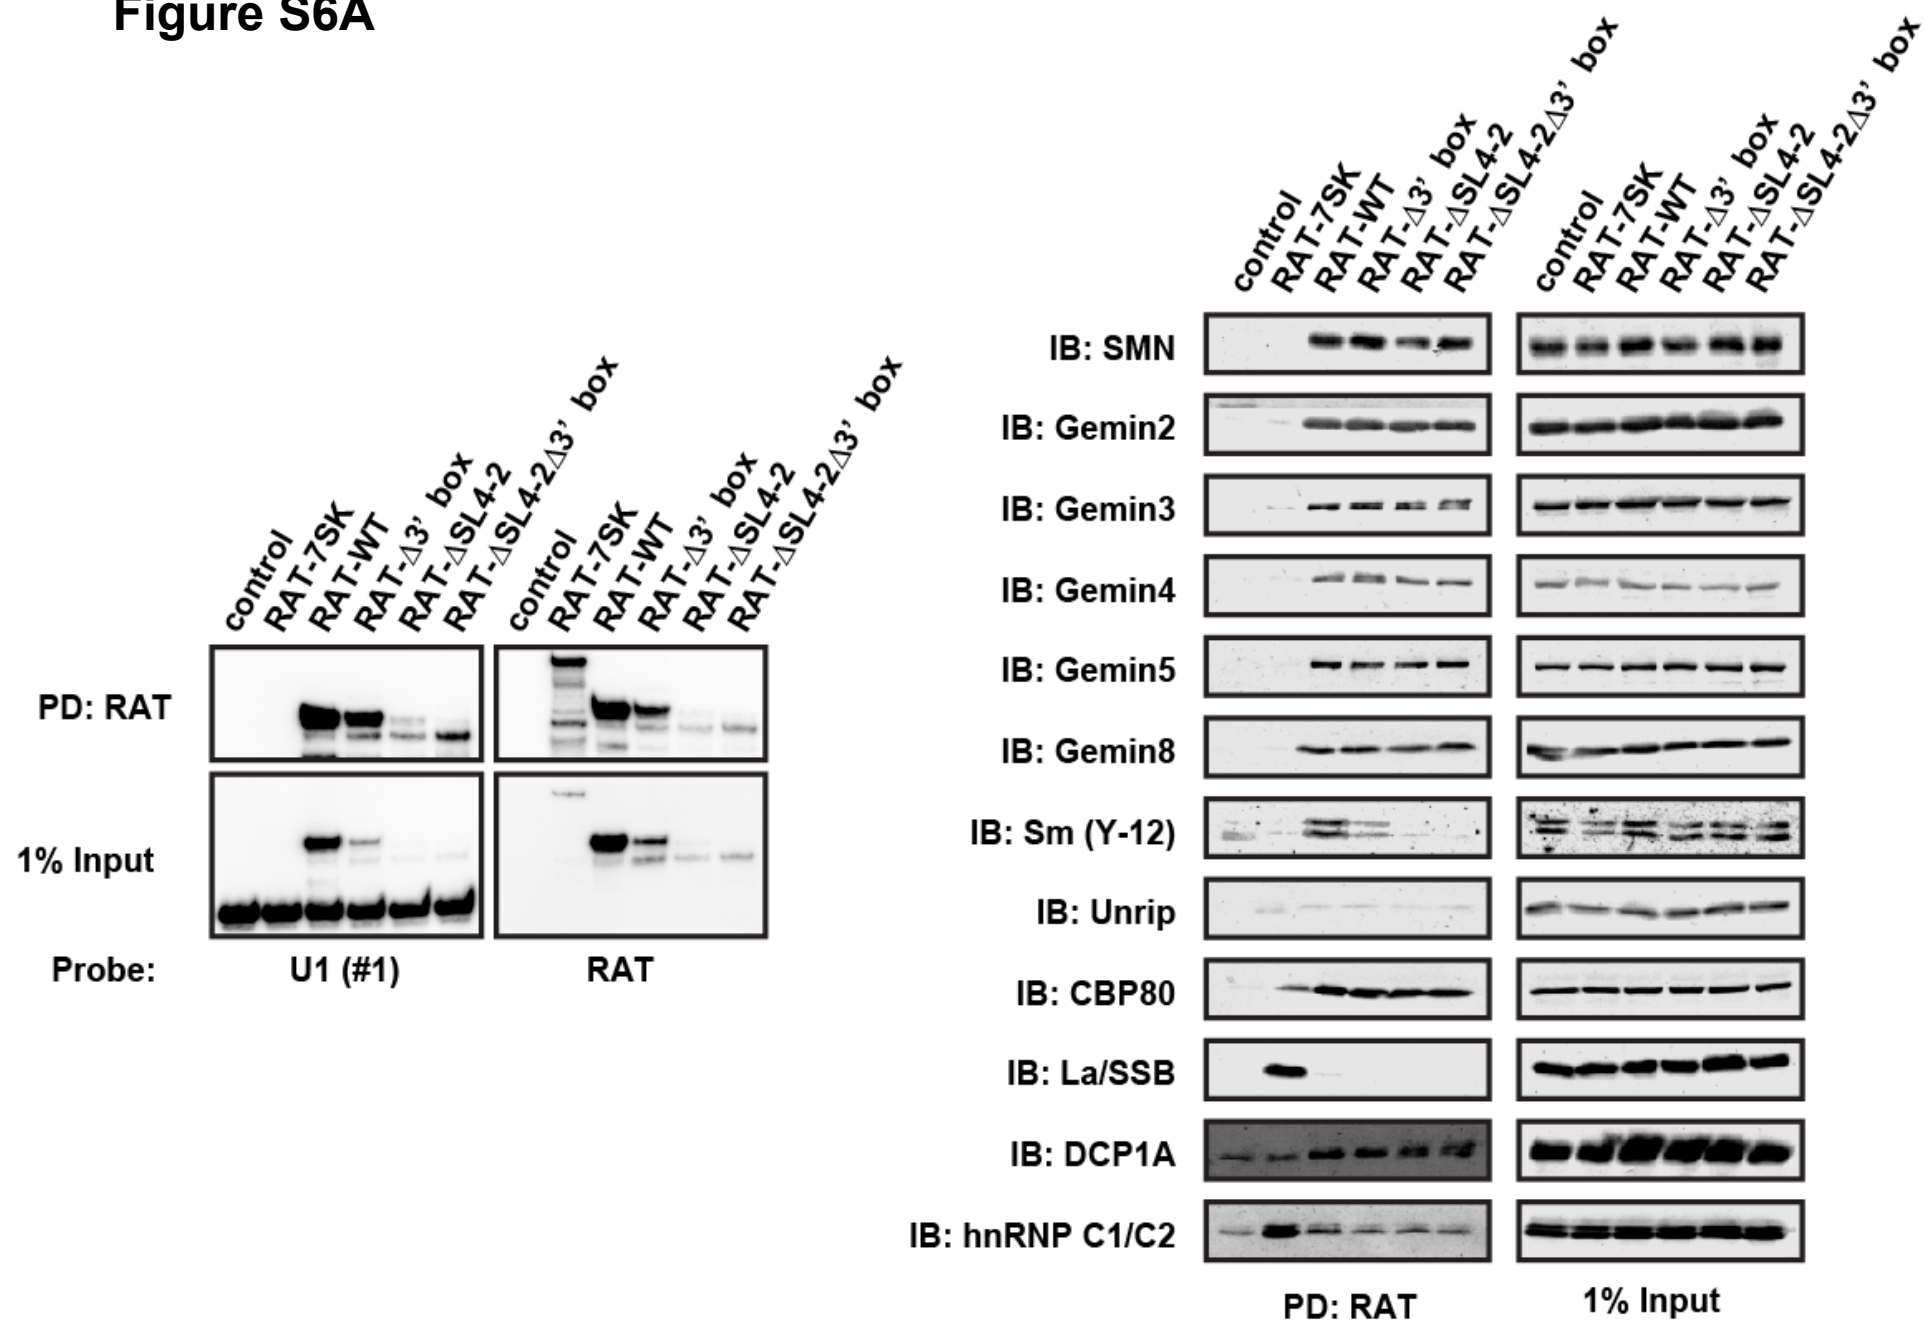

# Figure S6B

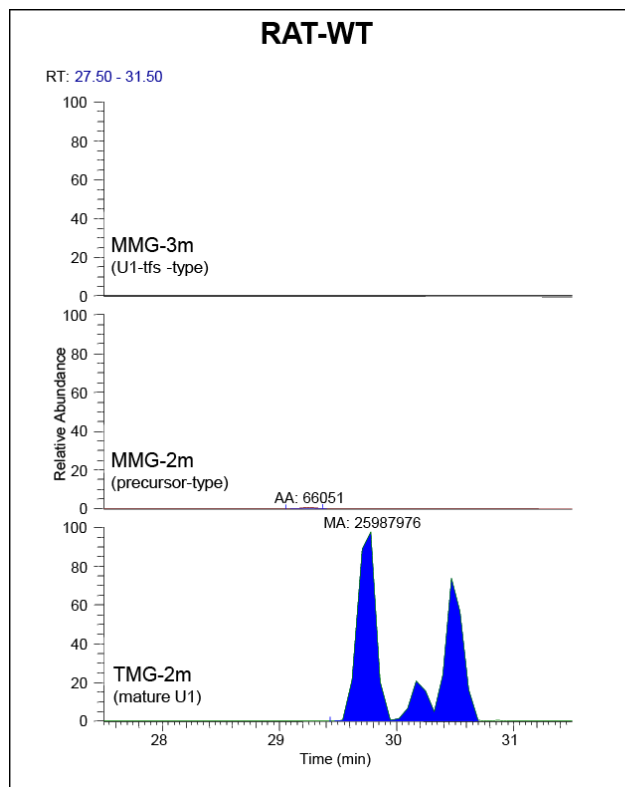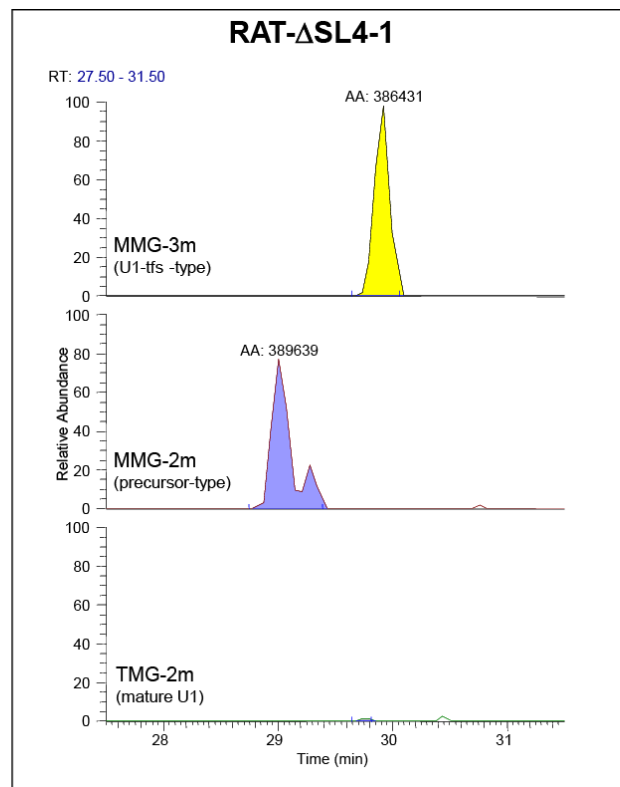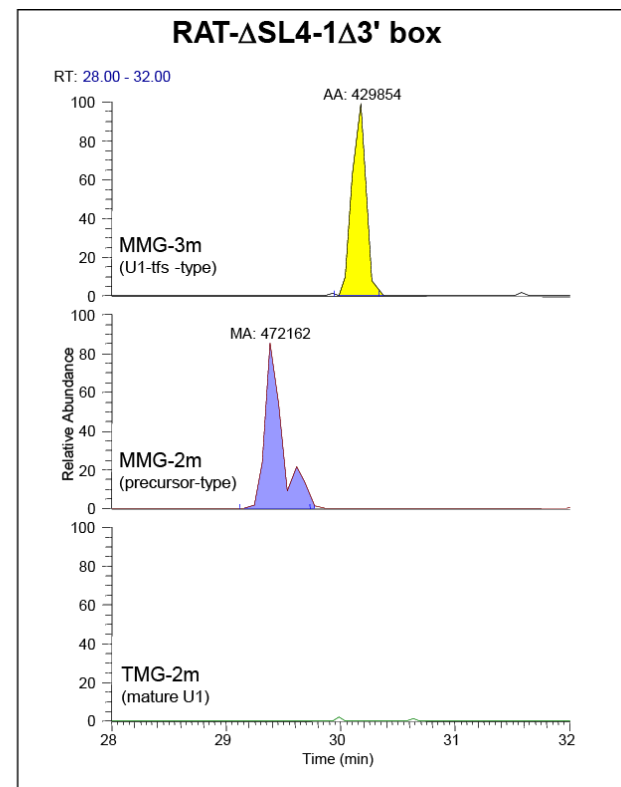

**Figure S7A**

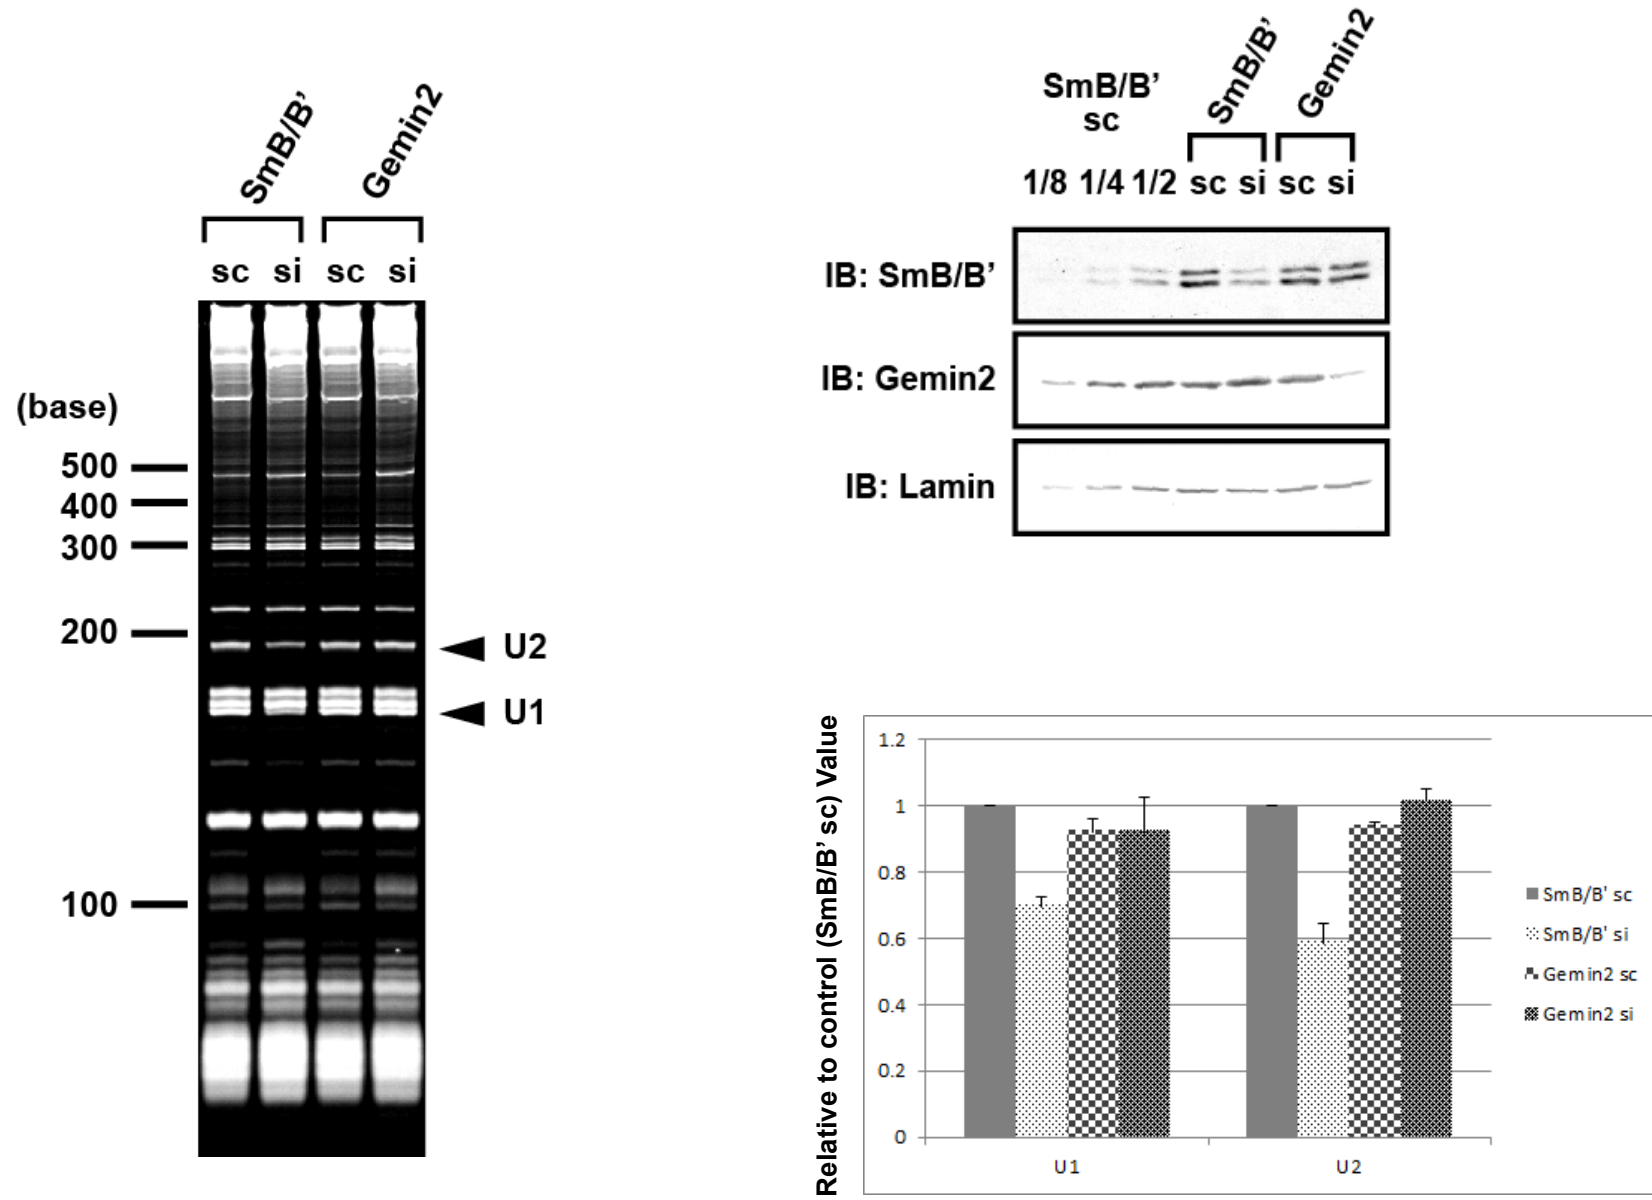

Figure S7B

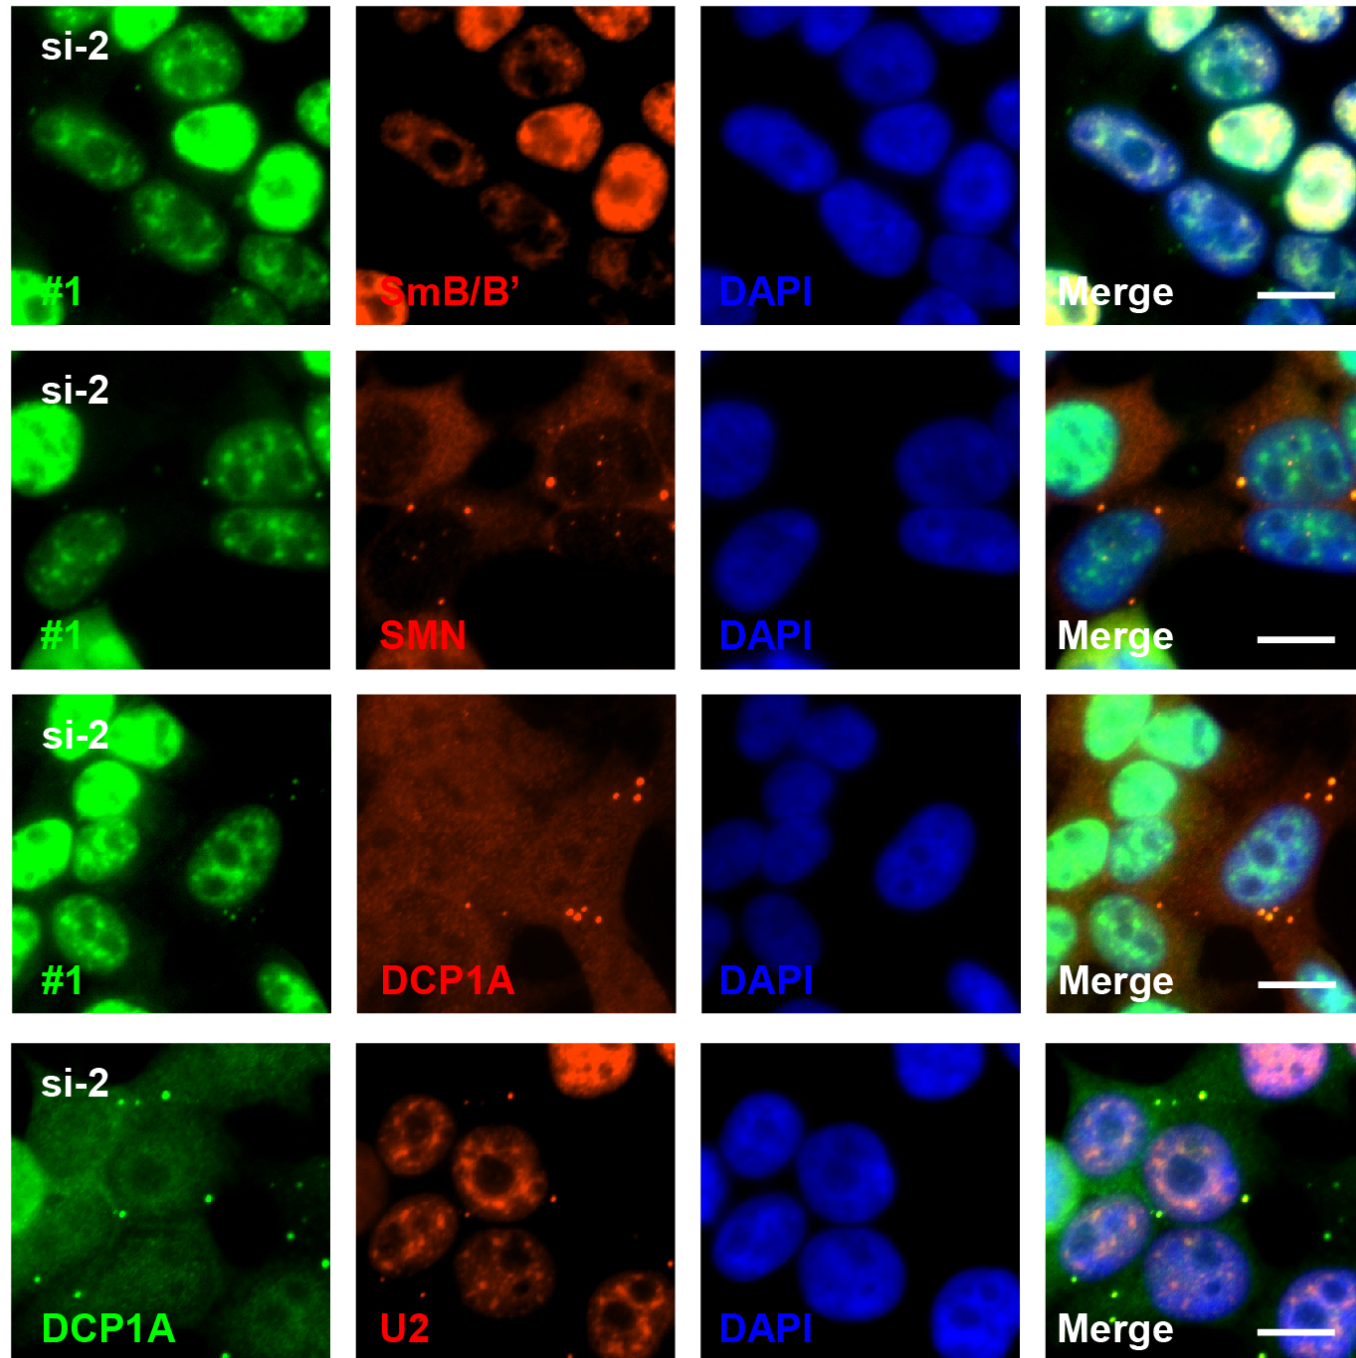



Figure S7C

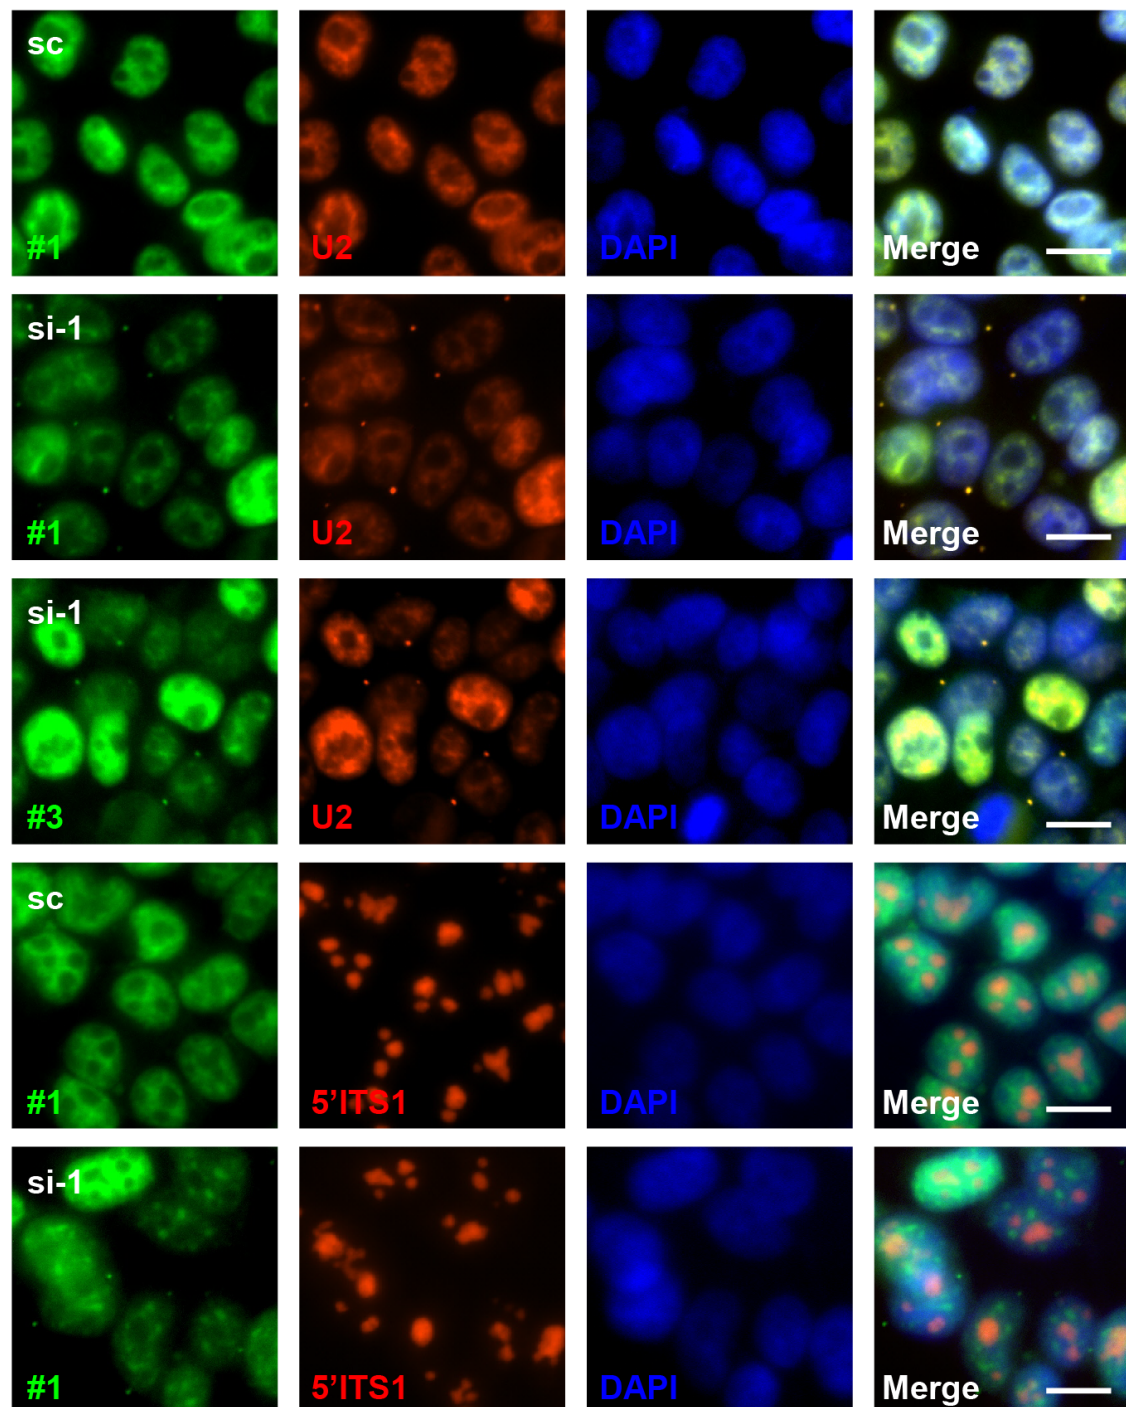



Figure S7D

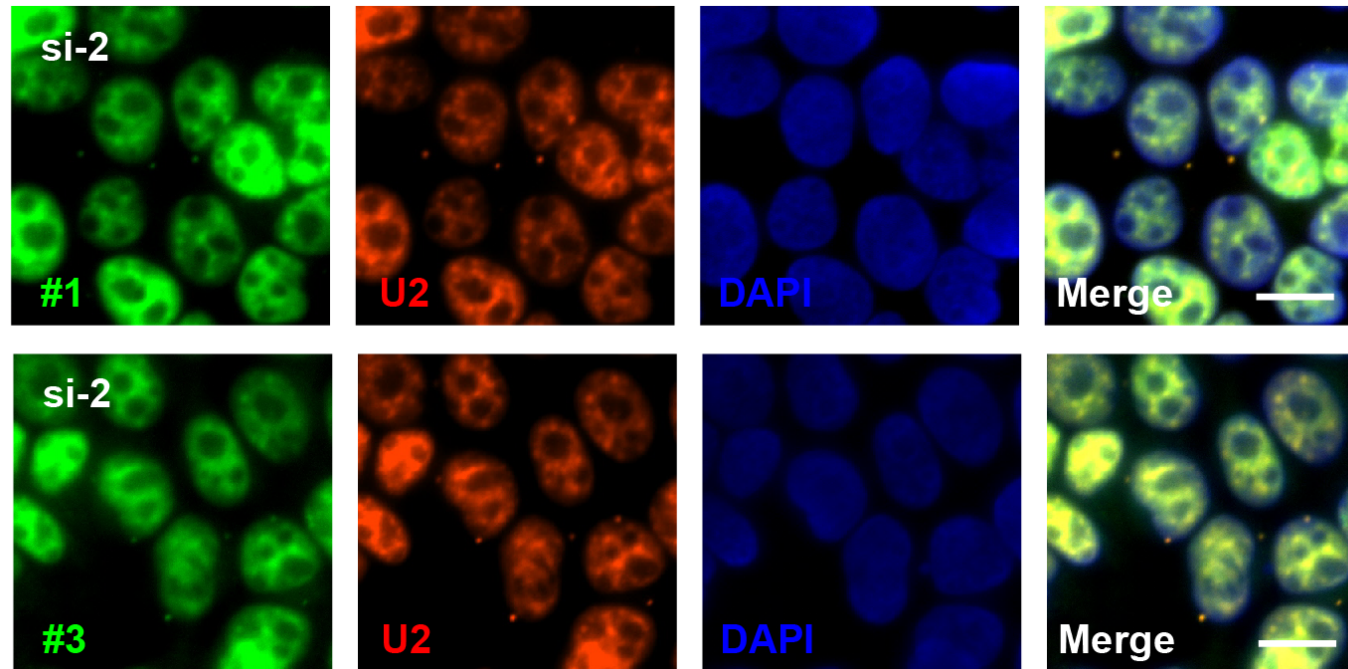

**Figure S7E**

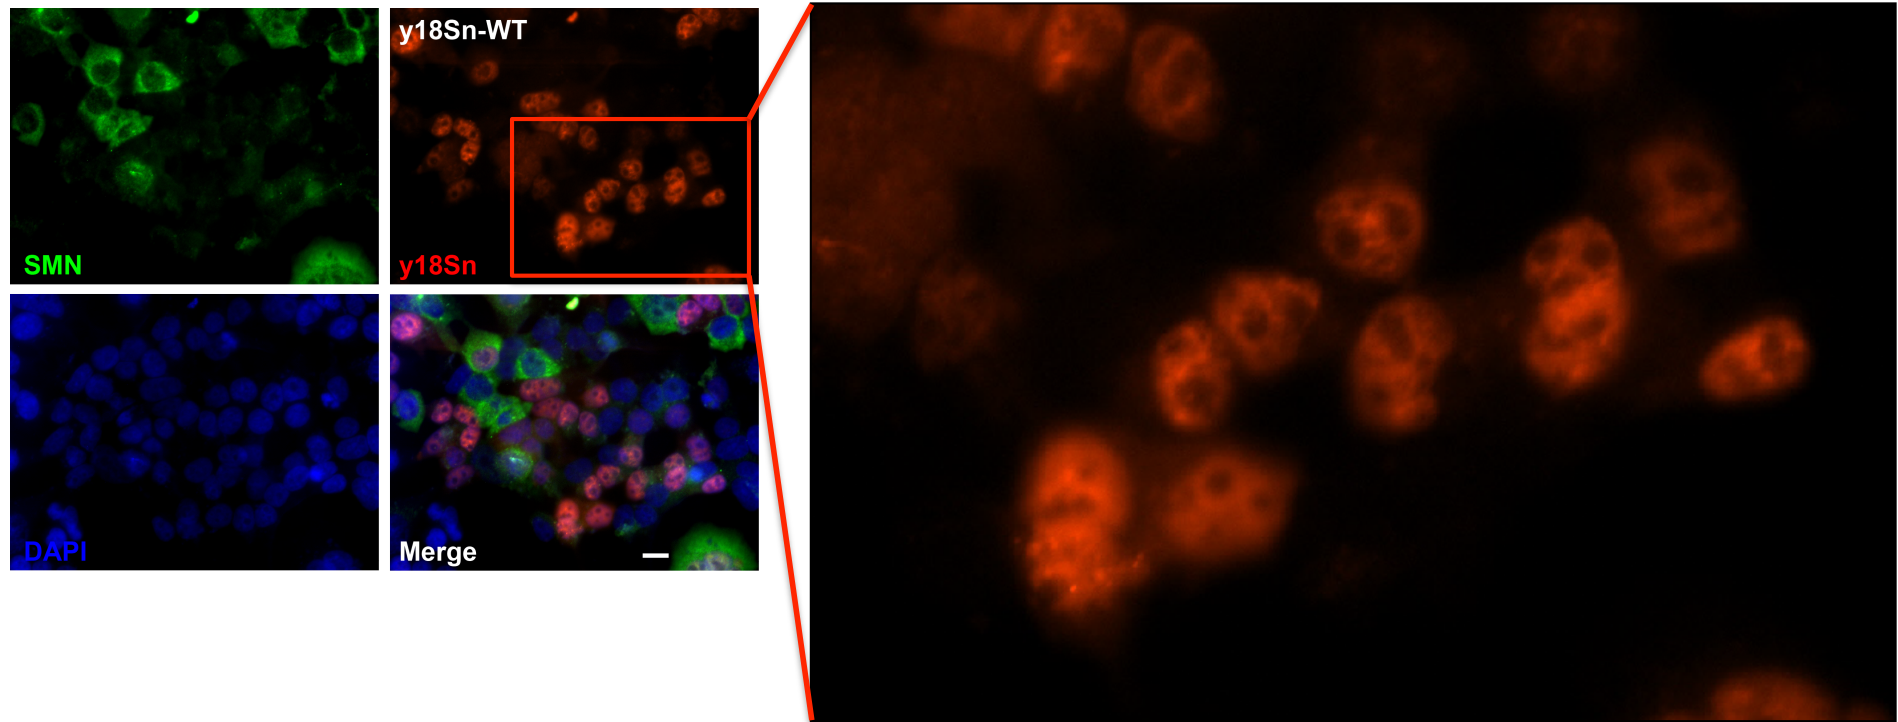

Supplementary Table 1. RNase T1 fragments of U snRNAs identified by LC-MS analysis.

| # of fraction | RNA name                                                | Sequence                                                                            | Residue number | Identified sequences                                                                                                                       | Retention time (min) | Intensity     | Observed m/z | Observed molecular mass | Theoretical molecular mass | $\Delta$ mass (ppm) | Charge              | a-series ions identified | c-series ions identified | w-series ions identified | y-series ions identified | Identification method | Remarks                                                                                                                         |                                                                                                                                                                                                                                                                                                                                                                                         |                                                                                                                                                                                                                                                                                                                                                                                         |                                                                                     |
|---------------|---------------------------------------------------------|-------------------------------------------------------------------------------------|----------------|--------------------------------------------------------------------------------------------------------------------------------------------|----------------------|---------------|--------------|-------------------------|----------------------------|---------------------|---------------------|--------------------------|--------------------------|--------------------------|--------------------------|-----------------------|---------------------------------------------------------------------------------------------------------------------------------|-----------------------------------------------------------------------------------------------------------------------------------------------------------------------------------------------------------------------------------------------------------------------------------------------------------------------------------------------------------------------------------------|-----------------------------------------------------------------------------------------------------------------------------------------------------------------------------------------------------------------------------------------------------------------------------------------------------------------------------------------------------------------------------------------|-------------------------------------------------------------------------------------|
| 1             | U7                                                      | AGUGUACAG<br>CUCUUUAGA<br>AUUUUCUJAG<br>UAGGCUUUCU<br>GGUUUUUAC<br>CGGAAAGCCC<br>CU | 1-4            | m <sub>2</sub> <sup>2,2,7</sup> GpppAGUG>p + 2 methyl                                                                                      | 32.08                | 32200         | 949.10510    | 1900.2259               | 1900.2310                  | -2.7                | -2                  | -                        | c3                       | -                        | -                        | -                     | manually identified                                                                                                             | M-B(m <sub>2</sub> <sup>2,2,7</sup> G), M-B(m <sub>2</sub> <sup>2,2,7</sup> G)-H <sub>2</sub> O, M-m <sub>2</sub> <sup>2,2,7</sup> Gp, M-m <sub>2</sub> <sup>2,2,7</sup> Gpp, m <sub>2</sub> <sup>2,2,7</sup> Gp and m <sub>2</sub> <sup>2,2,7</sup> Gpp were identified in the MS/MS spectrum. The trimethylguanine structure was also identified by the previous study <sup>1</sup> . |                                                                                                                                                                                                                                                                                                                                                                                         |                                                                                     |
|               |                                                         |                                                                                     | 1-4            | m <sub>2</sub> <sup>2,2,7</sup> GpppAGUG>p + 2 methyl                                                                                      | 30.59                | 22100         | 958.11066    | 1918.2370               | 1918.2416                  | -2.4                | -2                  | -                        | -                        | -                        | -                        | -                     | -                                                                                                                               | manually identified                                                                                                                                                                                                                                                                                                                                                                     | M-B(m <sub>2</sub> <sup>2,2,7</sup> G), M-B(m <sub>2</sub> <sup>2,2,7</sup> G)-H <sub>2</sub> O, M-m <sub>2</sub> <sup>2,2,7</sup> Gp, M-m <sub>2</sub> <sup>2,2,7</sup> Gpp, m <sub>2</sub> <sup>2,2,7</sup> Gp and m <sub>2</sub> <sup>2,2,7</sup> Gpp were identified in the MS/MS spectrum. The trimethylguanine structure was also identified by the previous study <sup>1</sup> . |                                                                                     |
|               |                                                         |                                                                                     | 5-10           | UUACAG>p                                                                                                                                   | 31.90                | 58000         | 959.11194    | 1920.2395               | 1920.2444                  | -2.5                | -2                  | a3-a5                    | c2-c5                    | w1-w3                    | y1-y5                    | -                     | -                                                                                                                               | Ariadne                                                                                                                                                                                                                                                                                                                                                                                 |                                                                                                                                                                                                                                                                                                                                                                                         |                                                                                     |
|               |                                                         |                                                                                     | 5-10           | UUACAGp                                                                                                                                    | 30.59                | 178000        | 968.11725    | 1938.2502               | 1938.2549                  | -2.5                | -2                  | a4,a6                    | c2-c6                    | w1-w3,w5                 | y1-y5                    | -                     | -                                                                                                                               | Ariadne                                                                                                                                                                                                                                                                                                                                                                                 |                                                                                                                                                                                                                                                                                                                                                                                         |                                                                                     |
|               |                                                         |                                                                                     | 11-19          | CUCUUUAG>p                                                                                                                                 | 32.08                | 50000         | 1406.14185   | 2814.2994               | 2814.3090                  | -3.4                | -2                  | a3,a5,a6                 | c2-c7                    | w5,w6,w8                 | y2-y8                    | -                     | -                                                                                                                               | Ariadne                                                                                                                                                                                                                                                                                                                                                                                 |                                                                                                                                                                                                                                                                                                                                                                                         |                                                                                     |
|               |                                                         |                                                                                     | 11-19          | CUCUUUAGp                                                                                                                                  | 30.81                | 169000        | 1415.14832   | 2832.3123               | 2832.3196                  | -2.6                | -2                  | a3,a6,a9                 | c2-c8                    | w5,w6                    | y2-y5,y7,y8              | -                     | -                                                                                                                               | Ariadne                                                                                                                                                                                                                                                                                                                                                                                 |                                                                                                                                                                                                                                                                                                                                                                                         |                                                                                     |
|               |                                                         |                                                                                     | 20-25          | AAUUG>p                                                                                                                                    | 35.97                | 281000        | 959.60321    | 1921.2221               | 1921.2284                  | -3.3                | -2                  | a3-a5                    | c1-c5                    | w1-w5                    | y1,y2,y4,y5              | -                     | -                                                                                                                               | Ariadne                                                                                                                                                                                                                                                                                                                                                                                 |                                                                                                                                                                                                                                                                                                                                                                                         |                                                                                     |
|               |                                                         |                                                                                     | 20-25          | AAUUGp                                                                                                                                     | 34.65                | 146000        | 968.60938    | 1939.2344               | 1939.2390                  | -2.3                | -2                  | a3-a6                    | c2-c6                    | w1,w5                    | y1-y5                    | -                     | -                                                                                                                               | Ariadne                                                                                                                                                                                                                                                                                                                                                                                 |                                                                                                                                                                                                                                                                                                                                                                                         |                                                                                     |
|               |                                                         |                                                                                     | 26-30          | UCUAG>p                                                                                                                                    | 32.76                | 35500         | 794.58618    | 1591.1880               | 1591.1919                  | -2.4                | -2                  | a2-a4                    | c2-c4                    | w1-w4                    | y1-y4                    | -                     | -                                                                                                                               | Ariadne                                                                                                                                                                                                                                                                                                                                                                                 |                                                                                                                                                                                                                                                                                                                                                                                         |                                                                                     |
|               |                                                         |                                                                                     | 26-30          | UCUAGp                                                                                                                                     | 30.59                | 41500         | 803.59155    | 1609.1988               | 1609.2024                  | -2.3                | -2                  | a3-a5                    | c1-c4                    | w2,w3                    | y1-y4                    | -                     | -                                                                                                                               | Ariadne                                                                                                                                                                                                                                                                                                                                                                                 |                                                                                                                                                                                                                                                                                                                                                                                         |                                                                                     |
|               |                                                         |                                                                                     | 35-41          | CUUUUCG>p                                                                                                                                  | 29.40                | 41800         | 1088.60498   | 2179.2256               | 2179.2312                  | -2.6                | -2                  | a4,a5                    | c2,c4-c6                 | w2,w4,w6                 | y2-y6                    | -                     | -                                                                                                                               | Ariadne                                                                                                                                                                                                                                                                                                                                                                                 |                                                                                                                                                                                                                                                                                                                                                                                         |                                                                                     |
|               |                                                         |                                                                                     | 35-41          | CUUUUCGp                                                                                                                                   | 27.52                | 11200         | 1097.61169   | 2197.2390               | 2197.2418                  | -1.3                | -2                  | a5                       | c2-c6                    | w2,w3                    | y2-y6                    | -                     | -                                                                                                                               | Ariadne                                                                                                                                                                                                                                                                                                                                                                                 |                                                                                                                                                                                                                                                                                                                                                                                         |                                                                                     |
|               |                                                         |                                                                                     | 43-52          | CUUUUUACCG>p                                                                                                                               | 33.49                | 11800         | 1038.77332   | 3119.3434               | 3119.3503                  | -2.2                | -3                  | a8                       | c2-c5,c7,c9              | w2                       | y2,y3,y5-y7,y9           | -                     | -                                                                                                                               | Ariadne                                                                                                                                                                                                                                                                                                                                                                                 |                                                                                                                                                                                                                                                                                                                                                                                         |                                                                                     |
|               |                                                         |                                                                                     | 43-52          | CUUUUUACCGp                                                                                                                                | 32.76                | 3420          | 1044.77637   | 3137.3526               | 3137.3609                  | -2.7                | -3                  | -                        | -                        | -                        | -                        | -                     | -                                                                                                                               | m/z                                                                                                                                                                                                                                                                                                                                                                                     |                                                                                                                                                                                                                                                                                                                                                                                         |                                                                                     |
|               |                                                         |                                                                                     | 54-57          | AAAG>p                                                                                                                                     | 36.47                | 7340          | 1331.19360   | 1332.2014               | 1332.2050                  | -2.7                | -1                  | -                        | -                        | -                        | -                        | -                     | -                                                                                                                               | -                                                                                                                                                                                                                                                                                                                                                                                       | m/z                                                                                                                                                                                                                                                                                                                                                                                     |                                                                                     |
|               |                                                         |                                                                                     | 54-57          | AAAGp                                                                                                                                      | 34.52                | 2410          | 1349.20422   | 1350.2120               | 1350.2156                  | -2.6                | -1                  | -                        | -                        | -                        | -                        | -                     | -                                                                                                                               | -                                                                                                                                                                                                                                                                                                                                                                                       | m/z                                                                                                                                                                                                                                                                                                                                                                                     |                                                                                     |
|               |                                                         |                                                                                     | 58-62          | CCCCU-OH                                                                                                                                   | 20.69                | 9050          | 731.10889    | 1464.2334               | 1464.2347                  | -0.9                | -2                  | -                        | -                        | -                        | -                        | -                     | -                                                                                                                               | -                                                                                                                                                                                                                                                                                                                                                                                       | m/z                                                                                                                                                                                                                                                                                                                                                                                     |                                                                                     |
|               |                                                         |                                                                                     | 1-3            | m <sub>2</sub> <sup>2,2,7</sup> GpppAUG>p + 2 methyl                                                                                       | 32.78                | 2220          | 776.58234    | 1555.1803               | 1555.1836                  | -2.1                | -2                  | -                        | -                        | -                        | -                        | -                     | -                                                                                                                               | -                                                                                                                                                                                                                                                                                                                                                                                       | m/z                                                                                                                                                                                                                                                                                                                                                                                     | The trimethylguanosine structure was deduced from the previous study <sup>2</sup> . |
|               |                                                         |                                                                                     | 4-8            | CUCUG>p                                                                                                                                    | 26.19                | 11100         | 782.58087    | 1567.1774               | 1567.1806                  | -2.1                | -2                  | a3,a4                    | c2-c4                    | w2,w3                    | y1-y4                    | -                     | -                                                                                                                               | manually identified                                                                                                                                                                                                                                                                                                                                                                     |                                                                                                                                                                                                                                                                                                                                                                                         |                                                                                     |
|               |                                                         |                                                                                     | 4-8            | CUCUGp                                                                                                                                     | 24.02                | 2310          | 791.58789    | 1585.1914               | 1585.1912                  | 0.2                 | -2                  | -                        | -                        | -                        | -                        | -                     | -                                                                                                                               | -                                                                                                                                                                                                                                                                                                                                                                                       | m/z                                                                                                                                                                                                                                                                                                                                                                                     |                                                                                     |
|               |                                                         |                                                                                     | 51-57          | AUUGCUCUGU<br>UUCUCUCAA<br>AUGGUAUAAA<br>UCUUUCCGCU<br>UUUUCUAAA<br>AUUCCGUGG<br>AGAGAAACCG<br>UUUUSAKUUU<br>CAAGCAAUUU<br>UUUGAAGCC<br>CU | 32.94                | 14300         | 1100.11829   | 2202.2522               | 2202.2584                  | -2.8                | -2                  | a3,a5,a6                 | c2,c4,c5                 | w2,w4                    | y3-y6                    | -                     | -                                                                                                                               | Ariadne                                                                                                                                                                                                                                                                                                                                                                                 |                                                                                                                                                                                                                                                                                                                                                                                         |                                                                                     |
|               |                                                         |                                                                                     | 51-57          | AUUUCCGp                                                                                                                                   | 31.32                | 1620          | 1109.12354   | 2220.2627               | 2220.2690                  | -2.8                | -2                  | -                        | -                        | -                        | -                        | -                     | -                                                                                                                               | -                                                                                                                                                                                                                                                                                                                                                                                       | m/z                                                                                                                                                                                                                                                                                                                                                                                     |                                                                                     |
|               |                                                         |                                                                                     | 65-70          | AAACCG>p                                                                                                                                   | 37.32                | 21700         | 970.13129    | 1942.2782               | 1942.2876                  | -4.8                | -2                  | a3-a5                    | c1,c3-c5                 | w1,w3-w5                 | y2-y5                    | -                     | -                                                                                                                               | Ariadne                                                                                                                                                                                                                                                                                                                                                                                 |                                                                                                                                                                                                                                                                                                                                                                                         |                                                                                     |
|               |                                                         |                                                                                     | 71-75          | UUUUG>p                                                                                                                                    | 28.27                | 6430          | 783.55512    | 1569.1459               | 1569.1486                  | -1.8                | -2                  | -                        | -                        | -                        | -                        | -                     | -                                                                                                                               | -                                                                                                                                                                                                                                                                                                                                                                                       | m/z                                                                                                                                                                                                                                                                                                                                                                                     |                                                                                     |
|               |                                                         |                                                                                     | 78-84          | UUUCAAG>p                                                                                                                                  | 35.59                | 7920          | 1112.12183   | 2226.2593               | 2226.2697                  | -4.7                | -2                  | -                        | -                        | -                        | -                        | -                     | -                                                                                                                               | -                                                                                                                                                                                                                                                                                                                                                                                       | m/z                                                                                                                                                                                                                                                                                                                                                                                     |                                                                                     |
|               |                                                         |                                                                                     | 78-84          | UUUCAAGp                                                                                                                                   | 34.38                | 10400         | 1121.12866   | 2244.2730               | 2244.2802                  | -3.2                | -2                  | a4                       | c2-c6                    | -                        | y1-y6                    | -                     | -                                                                                                                               | manually identified                                                                                                                                                                                                                                                                                                                                                                     |                                                                                                                                                                                                                                                                                                                                                                                         |                                                                                     |
|               |                                                         |                                                                                     | 85-95          | CAAAUUUUUUG>p                                                                                                                              | 35.96                | 12400         | 1156.78625   | 3473.3822               | 3473.3981                  | -4.6                | -3                  | a7                       | c2,c4-c10                | w3,w4                    | y2-y4,y6-y9              | -                     | -                                                                                                                               | Ariadne                                                                                                                                                                                                                                                                                                                                                                                 |                                                                                                                                                                                                                                                                                                                                                                                         |                                                                                     |
| 85-95         | CAAAUUUUUUGp                                            | 35.15                                                                               | 4240           | 1162.79297                                                                                                                                 | 3491.4024            | 3491.4087     | -1.8         | -3                      | -                          | -                   | -                   | -                        | -                        | -                        | -                        | m/z                   |                                                                                                                                 |                                                                                                                                                                                                                                                                                                                                                                                         |                                                                                                                                                                                                                                                                                                                                                                                         |                                                                                     |
| 96-98         | AAG>p                                                   | 34.10                                                                               | 28200          | 1002.14117                                                                                                                                 | 1003.1490            | 1003.1525     | -3.5         | -1                      | a2                         | c1,c2               | w1,w2               | y1,y2                    | -                        | -                        | manually identified      |                       |                                                                                                                                 |                                                                                                                                                                                                                                                                                                                                                                                         |                                                                                                                                                                                                                                                                                                                                                                                         |                                                                                     |
| 96-98         | AAGp                                                    | 31.72                                                                               | 8340           | 1020.15448                                                                                                                                 | 1021.1623            | 1021.1630     | -0.7         | -1                      | -                          | -                   | -                   | -                        | -                        | -                        | -                        | m/z                   |                                                                                                                                 |                                                                                                                                                                                                                                                                                                                                                                                         |                                                                                                                                                                                                                                                                                                                                                                                         |                                                                                     |
| 2-7           | UCUACG>p                                                | 29.79                                                                               | 122000         | 947.10516                                                                                                                                  | 1896.2260            | 1896.2331     | -3.8         | -2                      | a2,a3,a5,a6                | c1-c5               | w1,w2,w4,w5         | y1-y5                    | -                        | -                        | Ariadne                  |                       |                                                                                                                                 |                                                                                                                                                                                                                                                                                                                                                                                         |                                                                                                                                                                                                                                                                                                                                                                                         |                                                                                     |
| 2-7           | UCUACGp                                                 | 28.22                                                                               | 4880           | 956.11224                                                                                                                                  | 1914.2401            | 1914.2437     | -1.9         | -2                      | -                          | -                   | -                   | -                        | -                        | -                        | -                        | m/z                   |                                                                                                                                 |                                                                                                                                                                                                                                                                                                                                                                                         |                                                                                                                                                                                                                                                                                                                                                                                         |                                                                                     |
| 9-21          | CCAUACCCACCCUG>p                                        | 31.95                                                                               | 105000         | 1358.83752                                                                                                                                 | 4079.5460            | 4079.5446     | -2.1         | -3                      | a6,a10                     | c2-c6,c8-c12        | w2-w4,w6-w8,w10,w11 | y2-y9,y11,y12            | -                        | -                        | Ariadne                  |                       |                                                                                                                                 |                                                                                                                                                                                                                                                                                                                                                                                         |                                                                                                                                                                                                                                                                                                                                                                                         |                                                                                     |
| 9-21          | CCAUACCCACCCUGp                                         | 31.54                                                                               | 8800           | 1364.84094                                                                                                                                 | 4097.5463            | 4097.5552     | -2.2         | -3                      | -                          | -                   | -                   | -                        | -                        | -                        | -                        | m/z                   |                                                                                                                                 |                                                                                                                                                                                                                                                                                                                                                                                         |                                                                                                                                                                                                                                                                                                                                                                                         |                                                                                     |
| 22-25         | AACG>p                                                  | 34.83                                                                               | 46500          | 653.08698                                                                                                                                  | 1308.1896            | 1308.1938     | -3.2         | -2                      | a2-a4                      | c1,c3               | w1-w3               | y1-y3                    | -                        | -                        | Ariadne                  |                       |                                                                                                                                 |                                                                                                                                                                                                                                                                                                                                                                                         |                                                                                                                                                                                                                                                                                                                                                                                         |                                                                                     |
| 28-31         | CCCG>p                                                  | 26.04                                                                               | 4850           | 629.07745                                                                                                                                  | 1260.1706            | 1260.1713     | -0.6         | -2                      | -                          | -                   | -                   | -                        | -                        | -                        | -                        | m/z                   |                                                                                                                                 |                                                                                                                                                                                                                                                                                                                                                                                         |                                                                                                                                                                                                                                                                                                                                                                                         |                                                                                     |
| 32-37, 42-47  | AUCUCG>p                                                | 37.14                                                                               | 510000         | 947.10547                                                                                                                                  | 1896.2266            | 1896.2331     | -3.5         | -2                      | a3-a5                      | c2-c5               | w1-w5               | y1-y5                    | -                        | -                        | Ariadne                  |                       |                                                                                                                                 |                                                                                                                                                                                                                                                                                                                                                                                         |                                                                                                                                                                                                                                                                                                                                                                                         |                                                                                     |
| 32-37, 42-47  | AUCUCGp                                                 | 35.78                                                                               | 33100          | 956.11163                                                                                                                                  | 1914.2389            | 1914.2437     | -2.5         | -2                      | a3-a6                      | c1-c5               | w1-w4               | y1-y5                    | -                        | -                        | Ariadne                  |                       |                                                                                                                                 |                                                                                                                                                                                                                                                                                                                                                                                         |                                                                                                                                                                                                                                                                                                                                                                                         |                                                                                     |
| 38-41         | UCUG>p                                                  | 24.97                                                                               | 10200          | 1261.12915                                                                                                                                 | 1262.1370            | 1262.1393     | -1.9         | -1                      | a3                         | c2,c3               | w2                  | y2,y3                    | -                        | -                        | Ariadne                  |                       |                                                                                                                                 |                                                                                                                                                                                                                                                                                                                                                                                         |                                                                                                                                                                                                                                                                                                                                                                                         |                                                                                     |
| 49-51         | AAG>p                                                   | 34.10                                                                               | 28200          | 1002.14117                                                                                                                                 | 1003.1490            | 1003.1525     | -3.5         | -1                      | a2                         | c1,c2               | w1,w2               | y1,y2                    | -                        | -                        | manually identified      |                       |                                                                                                                                 |                                                                                                                                                                                                                                                                                                                                                                                         |                                                                                                                                                                                                                                                                                                                                                                                         |                                                                                     |
| 49-51         | AAGp                                                    | 31.72                                                                               | 8340           | 1020.15448                                                                                                                                 | 1021.1623            | 1021.1630     | -0.7         | -1                      | -                          | -                   | -                   | -                        | -                        | -                        | -                        | m/z                   |                                                                                                                                 |                                                                                                                                                                                                                                                                                                                                                                                         |                                                                                                                                                                                                                                                                                                                                                                                         |                                                                                     |
| 52-56         | CUAAG>p                                                 | 30.97                                                                               | 40100          | 806.09979                                                                                                                                  | 1614.2152            | 1614.2191     | -2.4         | -2                      | a2,a4                      | c2-c4               | w1-w4               | y2-y4                    | -                        | -                        | Ariadne                  |                       |                                                                                                                                 |                                                                                                                                                                                                                                                                                                                                                                                         |                                                                                                                                                                                                                                                                                                                                                                                         |                                                                                     |
| 52-56         | CUAAGp                                                  | 28.91                                                                               | 10400          | 815.10504                                                                                                                                  | 1632.2257            | 1632.2296     | -2.4         | -2                      | a4                         | c1-c4               | w1                  | y1,y2,y4                 | -                        | -                        | manually identified      |                       |                                                                                                                                 |                                                                                                                                                                                                                                                                                                                                                                                         |                                                                                                                                                                                                                                                                                                                                                                                         |                                                                                     |
| 67-70, 94-97  | CCUG>p                                                  | 25.44                                                                               | 7020           | 629.56866                                                                                                                                  | 1261.1530            | 1261.1553     | -1.9         | -2                      | -                          | -                   | -                   | -                        | -                        | -                        | -                        | m/z                   |                                                                                                                                 |                                                                                                                                                                                                                                                                                                                                                                                         |                                                                                                                                                                                                                                                                                                                                                                                         |                                                                                     |
| 72-75         | UUAG>p                                                  | 29.04                                                                               | 9030           | 1285.14050                                                                                                                                 | 1286.1483            | 1286.1506     | -1.7         | -1                      | -                          | -                   | -                   | -                        | -                        | -                        | -                        | m/z                   |                                                                                                                                 |                                                                                                                                                                                                                                                                                                                                                                                         |                                                                                                                                                                                                                                                                                                                                                                                         |                                                                                     |
| 72-75         | UUAGp                                                   | 26.79                                                                               | 6670           | 1303.15039                                                                                                                                 | 1304.1582            | 1304.1611     | -2.2         | -1                      | -                          | -                   | -                   | -                        | -                        | -                        | -                        | m/z                   |                                                                                                                                 |                                                                                                                                                                                                                                                                                                                                                                                         |                                                                                                                                                                                                                                                                                                                                                                                         |                                                                                     |
| 76-81         | UAUUG>p                                                 | 31.32                                                                               | 171000         | 947.59689                                                                                                                                  | 1897.2130            | 1897.2172     | -2.2         | -2                      | a3,a4                      | c2-c5               | w1-w5               | y1-y5                    | -                        | -                        | Ariadne                  |                       |                                                                                                                                 |                                                                                                                                                                                                                                                                                                                                                                                         |                                                                                                                                                                                                                                                                                                                                                                                         |                                                                                     |
| 76-81         | UAUUGp                                                  | 30.46                                                                               | 29200          | 956.60394                                                                                                                                  | 1915.2235            | 1915.2277     | -2.2         | -2                      | a3-a6                      | c2-c6               | w2,w3               | y1-y5                    | -                        | -                        | Ariadne                  |                       |                                                                                                                                 |                                                                                                                                                                                                                                                                                                                                                                                         |                                                                                                                                                                                                                                                                                                                                                                                         |                                                                                     |
| 83-85         | AUG>p                                                   | 28.34                                                                               | 20700          | 979.11493                                                                                                                                  | 980.1228             | 980.1253      | -2.6         | -1                      | -                          | c2                  | w1,w2               | y1,y2                    | -                        | -                        | manually identified      |                       |                                                                                                                                 |                                                                                                                                                                                                                                                                                                                                                                                         |                                                                                                                                                                                                                                                                                                                                                                                         |                                                                                     |
| 83-85         | AUGp                                                    | 26.09                                                                               | 1230           | 997.13025                                                                                                                                  | 998.1381             | 998.1358      | 2.3          | -1                      | -                          | -                   | -                   | -                        | -                        | -                        | -                        | m/z                   |                                                                                                                                 |                                                                                                                                                                                                                                                                                                                                                                                         |                                                                                                                                                                                                                                                                                                                                                                                         |                                                                                     |
| 90-93         | ACCG>p                                                  | 29.79                                                                               | 11900          | 641.08124                                                                                                                                  | 1284.1781            | 1284.1825     | -3.4         | -2                      | -                          | -                   | -                   | -                        | -                        | -                        | -                        | m/z                   |                                                                                                                                 |                                                                                                                                                                                                                                                                                                                                                                                         |                                                                                                                                                                                                                                                                                                                                                                                         |                                                                                     |
| 100-106       | AAUACCG>p                                               | 37.54                                                                               | 129000         | 1123.14343                                                                                                                                 | 2248.3129            | 2248.3129     | -4.6         | -2                      | a4-a6                      | c2-c6               | w1-w3,w5,w6         | y2-y6                    | -                        | -                        | Ariadne                  |                       |                                                                                                                                 |                                                                                                                                                                                                                                                                                                                                                                                         |                                                                                                                                                                                                                                                                                                                                                                                         |                                                                                     |
| 100-106       | AAUACCGp                                                | 36.55                                                                               | 10800          | 1132.14893                                                                                                                                 | 2266.3135            | 2266.3234     | -4.4         | -2                      | a5                         | c2-c6               | w2,w5,w6            | y2-y6                    | -                        | -                        | manually identified      |                       |                                                                                                                                 |                                                                                                                                                                                                                                                                                                                                                                                         |                                                                                                                                                                                                                                                                                                                                                                                         |                                                                                     |
| 114-116       | UAG>p                                                   | 27.07                                                                               | 3860           | 979.11487                                                                                                                                  | 980.1227             | 980.1253      | -2.6         | -1                      | -                          | -                   | -                   | -                        | -                        | -                        | -                        | m/z                   |                                                                                                                                 |                                                                                                                                                                                                                                                                                                                                                                                         |                                                                                                                                                                                                                                                                                                                                                                                         |                                                                                     |
| 114-116       | UAGp                                                    | 24.52                                                                               | 3500           | 997.12634                                                                                                                                  | 998.1342             | 998.1358      | -1.7         | -1                      | -                          | -                   | -                   | -                        | -                        | -                        | -                        | m/z                   |                                                                                                                                 |                                                                                                                                                                                                                                                                                                                                                                                         |                                                                                                                                                                                                                                                                                                                                                                                         |                                                                                     |
| 1-6           | m <sub>2</sub> <sup>2,2,7</sup> GpppACUCUG>p + 2 methyl | 34.40                                                                               | 17600          | 1234.63440                                                                                                                                 | 2471.2845            | 2471.2915     | -2.8         | -2                      | -                          | -                   | -                   | -                        | -                        | -                        | -                        | m/z                   | The trimethylguanosine structure was deduced from the previous study <sup>2</sup> .                                             |                                                                                                                                                                                                                                                                                                                                                                                         |                                                                                                                                                                                                                                                                                                                                                                                         |                                                                                     |
| 1-6           | m <sub>2</sub> <sup>2,2,7</sup> GpppACUCUG>p + 2 methyl | 33.09                                                                               | 3370           | 1243.63696                                                                                                                                 | 2489.2896            | 2489.3021     | -5.0         | -2                      | -                          | -                   | -                   | -                        | -                        | -                        | -                        | m/z                   | The trimethylguanosine structure was deduced from the previous study <sup>2</sup> .                                             |                                                                                                                                                                                                                                                                                                                                                                                         |                                                                                                                                                                                                                                                                                                                                                                                         |                                                                                     |
| 23-55         | UAUAAAUCUUUCGmCCUUmUAACmUAAAAGAUUCCG>p                  | 41.79                                                                               | 1120           | 1306.7782 *                                                                                                                                | 10462.2882 *         | 10462.31482 * | -2.5         | -8                      | -                          | -                   | -                   | -                        | -                        | -                        | -                        | m/z                   | The placement of methyl residue was deduced from the homology to USA and USB snRNA. This fragment contains one missed cleavage. |                                                                                                                                                                                                                                                                                                                                                                                         |                                                                                                                                                                                                                                                                                                                                                                                         |                                                                                     |

|            |            |                               |                                                          |                                                          |                                     |              |              |              |               |               |              |             |                 |                      |               |                                                                                    |                                                                                                                                                                                                                                                                                                        |                                                                                                                                                                                                                                                 |                                                                                                                                 |
|------------|------------|-------------------------------|----------------------------------------------------------|----------------------------------------------------------|-------------------------------------|--------------|--------------|--------------|---------------|---------------|--------------|-------------|-----------------|----------------------|---------------|------------------------------------------------------------------------------------|--------------------------------------------------------------------------------------------------------------------------------------------------------------------------------------------------------------------------------------------------------------------------------------------------------|-------------------------------------------------------------------------------------------------------------------------------------------------------------------------------------------------------------------------------------------------|---------------------------------------------------------------------------------------------------------------------------------|
| 4          | USE        | ACUCUGUUU                     | 49-55                                                    | AUUUCG>p                                                 | 33.33                               | 70700        | 1100.11829   | 2202.2522    | 2202.2584     | -2.8          | -2           | a4-a6       | c2-c6           | w1-w4,w6             | y2-y6         | Ariadne                                                                            |                                                                                                                                                                                                                                                                                                        |                                                                                                                                                                                                                                                 |                                                                                                                                 |
|            |            | CUCUUA AAAU                   | 49-55                                                    | AUUUCG>p                                                 | 31.56                               | 7960         | 1109.12256   | 2220.2608    | 2220.2690     | -3.7          | -2           |             |                 |                      |               |                                                                                    | m/z                                                                                                                                                                                                                                                                                                    |                                                                                                                                                                                                                                                 |                                                                                                                                 |
|            |            | UUUCGCCUU                     | 63-67                                                    | AAACG>p                                                  | 36.55                               | 5670         | 817.61255    | 1637.2408    | 1637.2463     | -3.4          | -2           |             |                 |                      |               |                                                                                    | m/z                                                                                                                                                                                                                                                                                                    |                                                                                                                                                                                                                                                 |                                                                                                                                 |
|            |            | IACUAAAGAU                    | 63-67                                                    | AAACG>p                                                  | 34.86                               | 1220         | 826.61554    | 1655.2467    | 1655.2569     | -6.1          | -2           |             |                 |                      |               |                                                                                    | m/z                                                                                                                                                                                                                                                                                                    |                                                                                                                                                                                                                                                 |                                                                                                                                 |
|            |            | UUCCGGGAG                     | 76-79                                                    | UCUG>p                                                   | 25.31                               | 10500        | 1261.12744   | 1262.1353    | 1262.1393     | -3.2          | -1           | a3          | c2,c3           | w1,w2                | y2,y3         | Ariadne                                                                            |                                                                                                                                                                                                                                                                                                        |                                                                                                                                                                                                                                                 |                                                                                                                                 |
|            |            | AGAAACGAGU                    | 76-79                                                    | UCUG>p                                                   | 25.31                               | 10500        | 1261.12744   | 1262.1353    | 1262.1393     | -3.2          | -1           |             |                 |                      |               |                                                                                    | m/z                                                                                                                                                                                                                                                                                                    |                                                                                                                                                                                                                                                 |                                                                                                                                 |
|            |            | GUCAGUCUGA                    | 76-79                                                    | UCUG>p                                                   | 25.31                               | 10500        | 1261.12744   | 1262.1353    | 1262.1393     | -3.2          | -1           |             |                 |                      |               |                                                                                    | m/z                                                                                                                                                                                                                                                                                                    |                                                                                                                                                                                                                                                 |                                                                                                                                 |
|            |            | AACCAAUUUU                    | 76-79                                                    | UCUG>p                                                   | 25.31                               | 10500        | 1261.12744   | 1262.1353    | 1262.1393     | -3.2          | -1           |             |                 |                      |               |                                                                                    | m/z                                                                                                                                                                                                                                                                                                    |                                                                                                                                                                                                                                                 |                                                                                                                                 |
|            |            | UUAGGCGCU                     | 76-79                                                    | UCUG>p                                                   | 25.31                               | 10500        | 1261.12744   | 1262.1353    | 1262.1393     | -3.2          | -1           |             |                 |                      |               |                                                                                    | m/z                                                                                                                                                                                                                                                                                                    |                                                                                                                                                                                                                                                 |                                                                                                                                 |
|            |            | GCUUUUUUUA                    | 76-79                                                    | UCUG>p                                                   | 21.79                               | 1140         | 1279.13452   | 1280.1423    | 1280.1499     | -5.9          | -1           |             |                 |                      |               |                                                                                    | m/z                                                                                                                                                                                                                                                                                                    |                                                                                                                                                                                                                                                 |                                                                                                                                 |
|            |            | GCAGGCGU                      | 76-79                                                    | UCUG>p                                                   | 21.79                               | 1140         | 1279.13452   | 1280.1423    | 1280.1499     | -5.9          | -1           |             |                 |                      |               |                                                                                    | m/z                                                                                                                                                                                                                                                                                                    |                                                                                                                                                                                                                                                 |                                                                                                                                 |
|            |            |                               | 80-93                                                    | AAACCAAUUUUUG>p                                          | 44.84                               | 233000       | 1477.83508   | 4436.5287    | 4436.5444     | -3.5          | -3           |             | c2-c6,c10-c12   | w7,w6,w10            | y2-y12        | Ariadne                                                                            |                                                                                                                                                                                                                                                                                                        |                                                                                                                                                                                                                                                 |                                                                                                                                 |
|            |            |                               | 80-93                                                    | AAACCAAUUUUUG>p                                          | 44.14                               | 51600        | 1483.83716   | 4454.5350    | 4454.5550     | -4.5          | -3           |             |                 | w7                   | y2-y8,y10,y13 | manually identified                                                                |                                                                                                                                                                                                                                                                                                        |                                                                                                                                                                                                                                                 |                                                                                                                                 |
|            |            |                               | 97-101                                                   | CCUUG>p                                                  | 26.84                               | 28200        | 782.58093    | 1567.1775    | 1567.1806     | -2.0          | -2           | a2-a5       | c2-c4           | w2-w4                | y1-y4         | Ariadne                                                                            |                                                                                                                                                                                                                                                                                                        |                                                                                                                                                                                                                                                 |                                                                                                                                 |
|            |            |                               | 97-101                                                   | CCUUG>p                                                  | 25.47                               | 2410         | 791.58472    | 1585.1851    | 1585.1912     | -3.8          | -2           |             |                 |                      |               |                                                                                    | m/z                                                                                                                                                                                                                                                                                                    |                                                                                                                                                                                                                                                 |                                                                                                                                 |
|            |            |                               | 1-7                                                      | m <sub>2</sub> <sup>2,2,2</sup> GpppAAUCUCG>p + 2 methyl | 38.34                               | 53700        | 1399.15637   | 2805.3284    | 2805.3440     | -5.6          | -2           |             |                 | C3,c4,c6             | w2-w4         | y3,y4                                                                              | manually identified                                                                                                                                                                                                                                                                                    | M-B(m <sub>2</sub> <sup>2,2,2</sup> G), M-B(m <sub>2</sub> <sup>2,2,2</sup> G)-H: O, M-m <sub>2</sub> <sup>2,2,2</sup> Gp, M-m <sub>2</sub> <sup>2,2,2</sup> Gpp and m <sub>2</sub> <sup>2,2,2</sup> Gpp were identified in the MS/MS spectrum. |                                                                                                                                 |
|            |            | 1-7                           | m <sub>2</sub> <sup>2,2,2</sup> GpppAAUCUCG>p + 2 methyl | 37.37                                                    | 7250                                | 1408.16406   | 2818.3438    | 2818.3546    | -3.8          | -2            |              |             |                 |                      |               | m/z                                                                                |                                                                                                                                                                                                                                                                                                        |                                                                                                                                                                                                                                                 |                                                                                                                                 |
|            |            | 10-22                         | UUUCUUCUCAAAG>p                                          | 34.18                                                    | 10500                               | 1360.14795   | 4083.4673    | 4083.4807    | -3.3          | -3            |              |             | c2-c4,c6-c8,c10 | w2,w3                |               | y3,y4,y6-y8,y10                                                                    | manually identified                                                                                                                                                                                                                                                                                    |                                                                                                                                                                                                                                                 |                                                                                                                                 |
|            |            | 10-22                         | UUUCUUCUCAAAG>p                                          | 33.33                                                    | 1920                                | 1366.15479   | 4101.4878    | 4101.4912    | -0.8          | -3            |              |             |                 |                      |               | m/z                                                                                |                                                                                                                                                                                                                                                                                                        |                                                                                                                                                                                                                                                 |                                                                                                                                 |
|            | 4          | RNUSE-6P*                     | AUACUGGOUU                                               | 25-57                                                    | CAUUAUUUUCGmCCUmUUACmJAAAGAUUUCCG>p | 42.29        | 1420         | 1306.65023 * | 10461.26444 * | 10461.33069 * | -6.3         | -8          |                 |                      |               |                                                                                    |                                                                                                                                                                                                                                                                                                        | m/z                                                                                                                                                                                                                                             | The placement of methyl residue was deduced from the homology to USA and USB snRNA. This fragment contains one missed cleavage. |
|            |            |                               | UUUCUUCUCAA                                              | 51-57                                                    | AUUUCG>p                            | 33.33        | 70700        | 1100.11829   | 2202.2522     | 2202.2584     | -2.8         | -2          | a4-a6           | c2-c6                | w1-w4,w6      | y2-y6                                                                              | Ariadne                                                                                                                                                                                                                                                                                                |                                                                                                                                                                                                                                                 |                                                                                                                                 |
|            |            |                               | AGCCCAUAAA                                               | 51-57                                                    | AUUUCG>p                            | 31.56        | 7960         | 1109.12256   | 2220.2608     | 2220.2690     | -3.7         | -2          |                 |                      |               |                                                                                    |                                                                                                                                                                                                                                                                                                        | m/z                                                                                                                                                                                                                                             |                                                                                                                                 |
|            |            |                               | UUUCGCCUU                                                | 51-57                                                    | AUUUCG>p                            | 31.56        | 7960         | 1109.12256   | 2220.2608     | 2220.2690     | -3.7         | -2          |                 |                      |               |                                                                                    |                                                                                                                                                                                                                                                                                                        | m/z                                                                                                                                                                                                                                             |                                                                                                                                 |
| UUUCUCAAAG |            |                               | 51-57                                                    | AUUUCG>p                                                 | 31.56                               | 7960         | 1109.12256   | 2220.2608    | 2220.2690     | -3.7          | -2           |             |                 |                      |               |                                                                                    | m/z                                                                                                                                                                                                                                                                                                    |                                                                                                                                                                                                                                                 |                                                                                                                                 |
| AGAAAAAGU  |            |                               | 65-68                                                    | AAAG>p                                                   | 37.06                               | 17000        | 665.09198    | 1332.1996    | 1332.2050     | -4.0          | -2           | a3          | c1-c3           | w1-w3                | y2,y3         | manually identified                                                                |                                                                                                                                                                                                                                                                                                        |                                                                                                                                                                                                                                                 |                                                                                                                                 |
| GUGAGUUUU  |            |                               | 65-68                                                    | AAAG>p                                                   | 35.04                               | 1700         | 674.09686    | 1350.2094    | 1350.2156     | -4.6          | -2           |             |                 |                      |               |                                                                                    | m/z                                                                                                                                                                                                                                                                                                    |                                                                                                                                                                                                                                                 |                                                                                                                                 |
| AUCAAUUUU  |            |                               | 65-68                                                    | AAAG>p                                                   | 35.04                               | 1700         | 674.09686    | 1350.2094    | 1350.2156     | -4.6          | -2           |             |                 |                      |               |                                                                                    | m/z                                                                                                                                                                                                                                                                                                    |                                                                                                                                                                                                                                                 |                                                                                                                                 |
| UUAGGCGGU  |            |                               | 76-93                                                    | UUUUUUUCAAUUUUUUG>p                                      | 39.50                               | 15900        | 1402.87988   | 5615.5508    | 5615.5752     | -4.3          | -4           |             |                 | c2-c7,c9-c11         | w2,w7         | y2-y8,y10,y11                                                                      | manually identified                                                                                                                                                                                                                                                                                    |                                                                                                                                                                                                                                                 |                                                                                                                                 |
| UUUUUUUUUA |            |                               | 76-93                                                    | UUUUUUUCAAUUUUUUG>p                                      | 38.79                               | 5050         | 1407.38538   | 5633.5728    | 5633.5858     | -2.3          | -4           |             |                 |                      |               |                                                                                    | m/z                                                                                                                                                                                                                                                                                                    |                                                                                                                                                                                                                                                 |                                                                                                                                 |
| UUUUUUUUUA |            |                               | 97-110                                                   | CCUCUUUUUUUCG>p                                          | 33.87                               | 12200        | 1446.14771   | 4341.4666    | 4341.4835     | -3.9          | -3           |             |                 | C3-C7,c9,c10,c12,c13 | w3            | y2,y4-y6,y10,y11,y13                                                               | manually identified                                                                                                                                                                                                                                                                                    |                                                                                                                                                                                                                                                 |                                                                                                                                 |
| UUUUUUUUUA |            |                               | 97-110                                                   | CCUCUUUUUUUCG>p                                          | 33.33                               | 1580         | 1452.15344   | 4359.4838    | 4359.4941     | -2.4          | -3           |             |                 |                      |               |                                                                                    | m/z                                                                                                                                                                                                                                                                                                    |                                                                                                                                                                                                                                                 |                                                                                                                                 |
|            |            |                               | 114-116                                                  | CUA-OH                                                   | 29.17                               | 21300        | 877.15289    | 878.1607     | 878.1633      | -3.0          | -1           |             |                 | c2                   | w1,w2         | y2                                                                                 | manually identified                                                                                                                                                                                                                                                                                    |                                                                                                                                                                                                                                                 |                                                                                                                                 |
|            |            |                               | 7-12                                                     | CUUCUG>p                                                 | 26.93                               | 12200        | 935.59290    | 1873.2015    | 1873.2059     | -2.4          | -2           | a3          | c2-c5           | w2,w4,w5             | y2-y5         | manually identified                                                                |                                                                                                                                                                                                                                                                                                        |                                                                                                                                                                                                                                                 |                                                                                                                                 |
|            |            |                               | 7-12                                                     | CUUCUG>p                                                 | 25.19                               | 7610         | 944.59863    | 1891.2129    | 1891.2165     | -1.9          | -2           |             |                 |                      |               |                                                                                    | m/z                                                                                                                                                                                                                                                                                                    |                                                                                                                                                                                                                                                 |                                                                                                                                 |
|            |            |                               | 23-28                                                    | CACACG>p                                                 | 31.16                               | 15200        | 968.12579    | 1918.2672    | 1918.2763     | -4.7          | -2           | a3,a5       | c2-c5           | w2-w5                | y1-y5         | Ariadne                                                                            |                                                                                                                                                                                                                                                                                                        |                                                                                                                                                                                                                                                 |                                                                                                                                 |
|            |            | 34-40                         | CAACUCG>p                                                | 32.87                                                    | 15100                               | 1111.13879   | 2224.2932    | 2224.3016    | -3.8          | -2            | a4,a6        | c3-c6       | w4-w6           | y2-y6                | Ariadne       |                                                                                    |                                                                                                                                                                                                                                                                                                        |                                                                                                                                                                                                                                                 |                                                                                                                                 |
|            |            | 34-40                         | CAACUCG>p                                                | 31.69                                                    | 4320                                | 1120.14587   | 2242.3074    | 2242.3122    | -2.1          | -2            |              |             |                 |                      |               | m/z                                                                                |                                                                                                                                                                                                                                                                                                        |                                                                                                                                                                                                                                                 |                                                                                                                                 |
|            |            | 41-44                         | AUUG>p                                                   | 30.37                                                    | 2370                                | 1285.13550   | 1286.1433    | 1286.1506    | -5.6          | -1            |              |             |                 |                      |               | m/z                                                                                |                                                                                                                                                                                                                                                                                                        |                                                                                                                                                                                                                                                 |                                                                                                                                 |
|            |            | 45-49                         | CUUCUG>p                                                 | 25.62                                                    | 11800                               | 782.58051    | 1567.1767    | 1567.1806    | -2.5          | -2            | a3,a4        | c3,c4       | w2-w4           | y2-y4                | Ariadne       |                                                                                    |                                                                                                                                                                                                                                                                                                        |                                                                                                                                                                                                                                                 |                                                                                                                                 |
| 5          |            | U11                           | AAAGGGUUC                                                | 57-61                                                    | AUUCG>p                             | 34.75        | 15000        | 806.09949    | 1614.2146     | 1614.2191     | -2.7         | -2          |                 |                      |               |                                                                                    |                                                                                                                                                                                                                                                                                                        | m/z                                                                                                                                                                                                                                             |                                                                                                                                 |
|            |            |                               | UGUCUGAGU                                                | 57-61                                                    | AUUCG>p                             | 34.75        | 15000        | 806.09949    | 1614.2146     | 1614.2191     | -2.7         | -2          |                 |                      |               |                                                                                    |                                                                                                                                                                                                                                                                                                        | m/z                                                                                                                                                                                                                                             |                                                                                                                                 |
|            |            |                               | GGCACAGUA                                                | 57-61                                                    | AAUCG>p                             | 33.32        | 2140         | 815.10486    | 1632.2254     | 1632.2296     | -2.6         | -2          |                 |                      |               |                                                                                    |                                                                                                                                                                                                                                                                                                        | m/z                                                                                                                                                                                                                                             |                                                                                                                                 |
|            | GGGCAACUCG |                               | 62-69                                                    | ACAUCAG>p                                                | 36.61                               | 8920         | 1287.66992   | 2577.3555    | 2577.3654     | -3.8          | -2           | a5          | c3-c6           | w2,w3,w5             | y3-y6         | Ariadne                                                                            |                                                                                                                                                                                                                                                                                                        |                                                                                                                                                                                                                                                 |                                                                                                                                 |
|            | AUUGUCUUCG |                               | 62-69                                                    | ACAUCAG>p                                                | 35.66                               | 9730         | 1296.67407   | 2595.3638    | 2595.3760     | -4.7          | -2           |             |                 |                      |               |                                                                                    | m/z                                                                                                                                                                                                                                                                                                    |                                                                                                                                                                                                                                                 |                                                                                                                                 |
|            | GUCCGGAUUC |                               | 62-69                                                    | ACAUCAG>p                                                | 35.66                               | 9730         | 1296.67407   | 2595.3638    | 2595.3760     | -4.7          | -2           |             |                 |                      |               |                                                                                    | m/z                                                                                                                                                                                                                                                                                                    |                                                                                                                                                                                                                                                 |                                                                                                                                 |
|            | GACAUCAAGA |                               | 62-69                                                    | ACAUCAG>p                                                | 35.66                               | 9730         | 1296.67407   | 2595.3638    | 2595.3760     | -4.7          | -2           |             |                 |                      |               |                                                                                    | m/z                                                                                                                                                                                                                                                                                                    |                                                                                                                                                                                                                                                 |                                                                                                                                 |
|            | GAUUUCGAA  |                               | 62-69                                                    | ACAUCAG>p                                                | 35.66                               | 9730         | 1296.67407   | 2595.3638    | 2595.3760     | -4.7          | -2           |             |                 |                      |               |                                                                                    | m/z                                                                                                                                                                                                                                                                                                    |                                                                                                                                                                                                                                                 |                                                                                                                                 |
|            | GCAUUUUUU  |                               | 72-77                                                    | AUUUCG>p                                                 | 32.87                               | 14900        | 947.59741    | 1897.2105    | 1897.2172     | -3.5          | -2           | a5          | c2-c5           | w1-w3                | y1-y5         | Ariadne                                                                            |                                                                                                                                                                                                                                                                                                        |                                                                                                                                                                                                                                                 |                                                                                                                                 |
|            | UUUGUUUUUG |                               | 72-77                                                    | AUUUCG>p                                                 | 32.87                               | 14900        | 947.59741    | 1897.2105    | 1897.2172     | -3.5          | -2           |             |                 |                      |               |                                                                                    | m/z                                                                                                                                                                                                                                                                                                    |                                                                                                                                                                                                                                                 |                                                                                                                                 |
|            | GGCACGUGU  |                               | 72-77                                                    | AUUUCG>p                                                 | 30.94                               | 4920         | 956.60211    | 1915.2199    | 1915.2277     | -4.1          | -2           |             |                 |                      |               |                                                                                    | m/z                                                                                                                                                                                                                                                                                                    |                                                                                                                                                                                                                                                 |                                                                                                                                 |
|            | GAUCGUUUG  |                               | 72-77                                                    | AUUUCG>p                                                 | 30.94                               | 4920         | 956.60211    | 1915.2199    | 1915.2277     | -4.1          | -2           |             |                 |                      |               |                                                                                    | m/z                                                                                                                                                                                                                                                                                                    |                                                                                                                                                                                                                                                 |                                                                                                                                 |
|            | CCCGGGGCC  |                               | 79-81                                                    | AAG>p                                                    | 33.32                               | 14100        | 1002.14069   | 1003.1485    | 1003.1525     | -4.0          | -1           |             |                 | c2                   | w1,w2         | y1,y2                                                                              | manually identified                                                                                                                                                                                                                                                                                    |                                                                                                                                                                                                                                                 |                                                                                                                                 |
|            | UU         |                               | 79-81                                                    | AAG>p                                                    | 30.75                               | 13900        | 1020.15186   | 1021.1597    | 1021.1630     | -3.3          | -1           |             |                 | c1,c2                | w1            | y2                                                                                 | manually identified                                                                                                                                                                                                                                                                                    |                                                                                                                                                                                                                                                 |                                                                                                                                 |
|            |            |                               | 82-93                                                    | CAUAAUUUUUUG>p                                           | 36.09                               | 10500        | 1258.79578   | 3779.4108    | 3779.4234     | -3.3          | -3           |             |                 | c3-c6,c8-c11         |               |                                                                                    | y2,y3,y5-y7,y10,y11                                                                                                                                                                                                                                                                                    | manually identified                                                                                                                                                                                                                             |                                                                                                                                 |
|            |            |                               | 82-93                                                    | CAUAAUUUUUUG>p                                           | 35.19                               | 9240         | 1264.79895   | 3797.4203    | 3797.4340     | -3.6          | -3           |             |                 |                      |               |                                                                                    | m/z                                                                                                                                                                                                                                                                                                    |                                                                                                                                                                                                                                                 |                                                                                                                                 |
|            |            | 95-100                        | UAUUUUG>p                                                | 30.94                                                    | 47000                               | 948.08899    | 1898.1936    | 1898.2012    | -4.0          | -2            | a3,a4        | c2-c5       | w2-w4           | y1-y5                | Ariadne       |                                                                                    |                                                                                                                                                                                                                                                                                                        |                                                                                                                                                                                                                                                 |                                                                                                                                 |
|            |            | 112-115                       | AUCG>p                                                   | 29.79                                                    | 12300                               | 641.57336    | 1285.1624    | 1285.1665    | -3.3          | -2            |              |             | c1,c2           | w1,w2                | y1,y3         | manually identified                                                                |                                                                                                                                                                                                                                                                                                        |                                                                                                                                                                                                                                                 |                                                                                                                                 |
|            |            | 120-124                       | UCCCG>p                                                  | 28.92                                                    | 9060                                | 782.08844    | 1566.1925    | 1566.1966    | -2.6          | -2            |              |             |                 |                      |               | m/z                                                                                |                                                                                                                                                                                                                                                                                                        |                                                                                                                                                                                                                                                 |                                                                                                                                 |
|            |            | 128-132                       | CCCUU-OH                                                 | 23.32                                                    | 5680                                | 731.59979    | 1465.2152    | 1465.2187    | -2.4          | -2            |              |             |                 |                      |               | m/z                                                                                |                                                                                                                                                                                                                                                                                                        |                                                                                                                                                                                                                                                 |                                                                                                                                 |
|            |            | 1-8                           | m <sub>2</sub> <sup>2,2,2</sup> GpppAmUmACUCG>p          | 34.97                                                    | 15100                               | 1034.44421   | 3106.3561    | 3106.3693    | -4.3          | -3            |              |             |                 | w2                   | y2,y3         | manually identified                                                                | M-B(m <sub>2</sub> <sup>2,2,2</sup> G), M-B(m <sub>2</sub> <sup>2,2,2</sup> G)-H: O, M-m <sub>2</sub> <sup>2,2,2</sup> Gp and M-m <sub>2</sub> <sup>2,2,2</sup> Gpp were identified in the MS/MS spectrum. The trimethylguanine structure was also identified by the previous study <sup>1</sup> . The |                                                                                                                                                                                                                                                 |                                                                                                                                 |
|            |            | 1-8                           | m <sub>2</sub> <sup>2,2,2</sup> GpppAmUmACUCG>p          | 34.13                                                    | 9080                                | 1040.44775   | 3124.3667    | 3124.3799    | -4.2          | -3            |              |             |                 |                      |               | m/z                                                                                | The trimethylguanine structure was reported in the previous study <sup>1</sup> . The placement of methyl residues were deduced from the previous study <sup>1</sup> .                                                                                                                                  |                                                                                                                                                                                                                                                 |                                                                                                                                 |
|            |            | 10-20                         | UUUCUUCUACAG>p                                           | 29.79                                                    | 8000                                | 1140.78015   | 3425.3639    | 3425.3756    | -3.4          | -3            |              |             |                 |                      |               | m/z                                                                                |                                                                                                                                                                                                                                                                                                        |                                                                                                                                                                                                                                                 |                                                                                                                                 |
|            | 10-20      | UUUCUUCUACAG>p                | 28.98                                                    | 20200                                                    | 1146.78259                          | 3443.3712    | 3443.3862    | -4.3         | -3            | a2,a6,a11     | c2-c7,c9,c10 | w2,w5,w6    | y2-y6,y8,y10    | Ariadne              |               |                                                                                    |                                                                                                                                                                                                                                                                                                        |                                                                                                                                                                                                                                                 |                                                                                                                                 |
|            | 10-20      | UUUCUUCUACAG>p                | 29.79                                                    | 12300                                                    | 641.57336                           | 1285.1624    | 1285.1665    | -3.3         | -2            |               |              |             |                 |                      | m/z           |                                                                                    |                                                                                                                                                                                                                                                                                                        |                                                                                                                                                                                                                                                 |                                                                                                                                 |
|            | 21-24      | AUCG>p                        | 29.79                                                    | 12300                                                    | 641.57336                           | 1285.1624    | 1285.1665    | -3.3         | -2            |               |              |             |                 |                      | m/z           |                                                                                    |                                                                                                                                                                                                                                                                                                        |                                                                                                                                                                                                                                                 |                                                                                                                                 |
|            | 25-50      | UAUAAAUUUUUGmCCUmUUACmJAAAG>p | 40.08                                                    | 1350                                                     | 1375.48816 *                        | 8258.97591 * | 8259.05396 * | -9.5         | -6            |               |              |             |                 |                      | m/z           | The placement of methyl residue was deduced from the previous study <sup>1</sup> . |                                                                                                                                                                                                                                                                                                        |                                                                                                                                                                                                                                                 |                                                                                                                                 |
|            | 51-57      | AUUUCG>p                      | 32.12                                                    | 78400                                                    | 1100.11658                          | 2202.2488    | 2202.2584    | -4.4         | -2            | a4-a6         | c2-c6        | w1,w2,w4-w6 | y2-y6           | Ariadne              |               |                                                                                    |                                                                                                                                                                                                                                                                                                        |                                                                                                                                                                                                                                                 |                                                                                                                                 |
| 5          | USB        | AUACUCUGU                     | 51-57                                                    | AUUUCG>p                                                 | 30.37                               | 30200        | 1109.12256   | 2220.2608    | 2220.2690     | -3.7          | -2           | a3,a5-a7    | c2-c7           | w2,w4-w6             | y2-y6         | Ariadne                                                                            |                                                                                                                                                                                                                                                                                                        |                                                                                                                                                                                                                                                 |                                                                                                                                 |
|            |            | UUUCUUCUACAG                  | 66-75                                                    | AACACUCUG>p                                              | 36.25                               | 34500        | 1061.79846   | 3188.4189    | 3188.4320     | -4.1          | -3           | a3,a6       | c2,c4-c8        | w2,w4,w5,w7          | y2-y6,y8,y9   | Ariadne                                                                            |                                                                                                                                                                                                                                                                                                        |                                                                                                                                                                                                                                                 |                                                                                                                                 |
|            |            | AUUCGCCUU                     | 66-75                                                    | AACACUCUG>p                                              | 35.50                               | 21500        | 1067.80200   | 3206.4295    | 3206.4426     | -4.1          | -3           | a4,a6       | c4-c7           | w2,w4,w5             | y1,y4-y9      | Ariadne                                                                            |                                                                                                                                                                                                                                                                                                        |                                                                                                                                                                                                                                                 |                                                                                                                                 |
|            |            | UUUCUCAAAG                    | 66-75                                                    | AACACUCUG>p                                              | 35.50                               | 21500        | 1067.80200   | 3206.4295    | 3206.4426     | -4.1          | -3           |             |                 |                      |               |                                                                                    | m/z                                                                                                                                                                                                                                                                                                    |                                                                                                                                                                                                                                                 |                                                                                                                                 |
|            |            | UUUCGCCUGG                    | 78-84                                                    | UCUUAAAG>p                                               | 31.81                               | 21900        | 1112.12256   | 2226.2608    | 2226.2697     | -4.0          | -2           |             |                 |                      |               |                                                                                    |                                                                                                                                                                                                                                                                                                        |                                                                                                                                                                                                                                                 |                                                                                                                                 |

|                |                                                             |       |       |            |           |           |      |    |          |                    |             |                 |                     |                                                                                                                                                                                                                                                                                                                                             |
|----------------|-------------------------------------------------------------|-------|-------|------------|-----------|-----------|------|----|----------|--------------------|-------------|-----------------|---------------------|---------------------------------------------------------------------------------------------------------------------------------------------------------------------------------------------------------------------------------------------------------------------------------------------------------------------------------------------|
| 109-113        | ACAAG>p                                                     | 35.19 | 13300 | 817.61249  | 1637.2406 | 1637.2463 | -3.5 | -2 | a4       | c1-c4              | w2,w3       | y1-y4           | Ariadne             |                                                                                                                                                                                                                                                                                                                                             |
| 109-113        | ACAAAGp                                                     | 33.25 | 6050  | 826.61664  | 1655.2489 | 1655.2569 | -4.8 | -2 |          |                    |             |                 | m/z                 |                                                                                                                                                                                                                                                                                                                                             |
| 115-117        | CUA-OH                                                      | 28.42 | 10100 | 877.15277  | 878.1606  | 878.1633  | -3.1 | -1 | a2,a3    | c1                 | w2,w3       | y2              | manually identified |                                                                                                                                                                                                                                                                                                                                             |
| 1-9            | m <sub>2</sub> <sup>2,2,7</sup> GpppAGAUCCUCUG>p + 2 methyl | 35.19 | 27200 | 1149.46008 | 3451.4037 | 3451.4167 | -3.8 | -3 | -        | c4-c6,c8           | -           | y1-y4           | manually identified | M-B(m <sub>2</sub> <sup>2,2,7</sup> G), M-B(m <sub>2</sub> <sup>2,2,7</sup> G)-H; O, M-m <sub>2</sub> <sup>2,2,7</sup> Gp, M-m <sub>2</sub> <sup>2,2,7</sup> Gpp, m <sub>2</sub> <sup>2,2,7</sup> Gp and m <sub>2</sub> <sup>2,2,7</sup> Gpp were identified in the MS/MS spectrum. The trimethyuanine structure was also identified by the |
| 1-9            | m <sub>2</sub> <sup>2,2,7</sup> GpppAGAUCCUCUGp + 2 methyl  | 34.29 | 11200 | 1155.46375 | 3469.4147 | 3469.4273 | -3.6 | -3 | -        | c4                 | -           | y3              | manually identified | M-B(m <sub>2</sub> <sup>2,2,7</sup> G), M-B(m <sub>2</sub> <sup>2,2,7</sup> G)-H; O and M-m <sub>2</sub> <sup>2,2,7</sup> Gp were identified in the MS/MS spectrum. The trimethyuanine structure was also identified by the previous study <sup>1</sup> .                                                                                   |
| 52-58          | AUUUCCG>p                                                   | 32.12 | 78400 | 1100.11658 | 2202.2488 | 2202.2584 | -4.4 | -2 | a4-a6    | c2-c6              | w1,w2,w4-w6 | y2-y6           | Ariadne             |                                                                                                                                                                                                                                                                                                                                             |
| 52-58          | AUUUCCGp                                                    | 30.37 | 30200 | 1109.12256 | 2220.2608 | 2220.2690 | -3.7 | -2 | a3,a5-a7 | c2-c7              | w2,w4-w6    | y2-y6           | Ariadne             |                                                                                                                                                                                                                                                                                                                                             |
| 64-76          | AAAAACAACUAUG>p                                             | 39.43 | 6960  | 1398.85278 | 4199.5818 | 4199.6008 | -4.5 | -3 |          |                    |             |                 | m/z                 |                                                                                                                                                                                                                                                                                                                                             |
| 64-76          | AAAAACAACUAUGp                                              | 38.94 | 4340  | 1404.85742 | 4217.5957 | 4217.6113 | -3.7 | -3 |          |                    |             |                 | m/z                 |                                                                                                                                                                                                                                                                                                                                             |
| 79-84          | UUUAUG>p                                                    | 30.94 | 47000 | 948.08899  | 1898.1936 | 1898.2012 | -4.0 | -2 | a4,a5    | c1-c5              | w1,w2       | y1-y5           | manually identified |                                                                                                                                                                                                                                                                                                                                             |
| 79-84          | UUUAUGp                                                     | 29.47 | 27100 | 957.09454  | 1916.2047 | 1916.2117 | -3.7 | -2 | a3,a5,a6 | c2-c5              | w2          | y1-y5           | Ariadne             |                                                                                                                                                                                                                                                                                                                                             |
| 86-97          | UUAAUUUUUUUG>p                                              | 36.77 | 31800 | 1259.12280 | 3780.3919 | 3780.4074 | -4.1 | -3 | -        | c2,c5-c7,c10       | w7,w8       | y2,y3,y5-y7,y9  | Ariadne             |                                                                                                                                                                                                                                                                                                                                             |
| 86-97          | UUAAUUUUUUUGp                                               | 36.09 | 33800 | 1265.12671 | 3798.4036 | 3798.4180 | -3.8 | -3 | -        | c2,c3,c5-c7,c9,c10 | w8,w9       | y1-y3,y5,y10    | Ariadne             |                                                                                                                                                                                                                                                                                                                                             |
| 98-100         | AAG>p                                                       | 33.32 | 14100 | 1002.14069 | 1003.1485 | 1003.1525 | -4.0 | -1 | -        | c2                 | w1,w2       | y1,y2           | manually identified |                                                                                                                                                                                                                                                                                                                                             |
| 98-100         | AAGp                                                        | 30.75 | 13900 | 1020.15186 | 1021.1597 | 1021.1630 | -3.3 | -1 | -        | c1,c2              | w1          | y2              | manually identified |                                                                                                                                                                                                                                                                                                                                             |
| 101-105        | UCUU>p                                                      | 27.77 | 4000  | 783.07263  | 1568.1609 | 1568.1646 | -2.4 | -2 |          |                    |             |                 | m/z                 |                                                                                                                                                                                                                                                                                                                                             |
| 101-105        | UCUUg                                                       | 26.62 | 1110  | 792.07684  | 1586.1693 | 1586.1752 | -3.7 | -2 |          |                    |             |                 | m/z                 |                                                                                                                                                                                                                                                                                                                                             |
| 106-110        | CCUAG>p                                                     | 30.52 | 2700  | 794.09308  | 1590.2018 | 1590.2078 | -3.8 | -2 |          |                    |             |                 | m/z                 |                                                                                                                                                                                                                                                                                                                                             |
| 112-115        | CAAG>p                                                      | 34.08 | 7690  | 653.08691  | 1308.1895 | 1308.1938 | -3.3 | -2 |          |                    |             |                 | m/z                 |                                                                                                                                                                                                                                                                                                                                             |
| 2-9            | ACUCUUAAG>p                                                 | 35.78 | 17300 | 1264.64355 | 2531.3028 | 2531.3110 | -3.2 | -2 |          |                    |             |                 | m/z                 |                                                                                                                                                                                                                                                                                                                                             |
| 2-9            | ACUCUUAAGp                                                  | 34.66 | 20300 | 1273.64771 | 2549.3111 | 2549.3215 | -4.1 | -2 |          |                    |             |                 | m/z                 |                                                                                                                                                                                                                                                                                                                                             |
| 16-23          | AUCACUCG>p                                                  | 38.12 | 31800 | 1264.15076 | 2530.3172 | 2530.3269 | -3.9 | -2 | a4,a5    | c2,c4-c7           | w2-w5       | y2,y3,y5-y7     | Ariadne             |                                                                                                                                                                                                                                                                                                                                             |
| 16-23          | AUCACUCGp                                                   | 37.00 | 8980  | 1273.15662 | 2548.3289 | 2548.3375 | -3.4 | -2 |          |                    |             |                 | m/z                 |                                                                                                                                                                                                                                                                                                                                             |
| 36-38          | AUG>p                                                       | 30.63 | 39400 | 979.11359  | 980.1214  | 980.1253  | -3.9 | -1 | -        | c2                 | w1,w2       | y1,y2           | manually identified |                                                                                                                                                                                                                                                                                                                                             |
| 36-38          | AUGp                                                        | 28.35 | 3630  | 997.12494  | 998.1328  | 998.1358  | -3.1 | -1 |          |                    |             |                 | m/z                 |                                                                                                                                                                                                                                                                                                                                             |
| 39-41          | AAG>p                                                       | 36.34 | 30300 | 1002.14124 | 1003.1491 | 1003.1525 | -3.4 | -1 | -        | c1,c2              | w1,w2       | y1,y2           | manually identified |                                                                                                                                                                                                                                                                                                                                             |
| 39-41          | AAGp                                                        | 33.77 | 20500 | 1020.15155 | 1021.1594 | 1021.1630 | -3.6 | -1 |          |                    |             |                 | m/z                 |                                                                                                                                                                                                                                                                                                                                             |
| 42-45, 102-105 | AACG>p                                                      | 37.00 | 6970  | 653.08728  | 1308.1902 | 1308.1938 | -2.7 | -2 |          |                    |             |                 | m/z                 |                                                                                                                                                                                                                                                                                                                                             |
| 49-52          | CUAG>p                                                      | 30.17 | 4120  | 1284.15662 | 1285.1644 | 1285.1665 | -1.6 | -1 |          |                    |             |                 | m/z                 |                                                                                                                                                                                                                                                                                                                                             |
| 60-67          | AAUUAUUG>p                                                  | 41.41 | 20100 | 1288.65369 | 2579.3230 | 2579.3334 | -4.0 | -2 | -        | c2-c6              | w2,w4,w6,w7 | y3-y6           | Ariadne             |                                                                                                                                                                                                                                                                                                                                             |
| 60-67          | AAUUAUUGp                                                   | 40.31 | 9180  | 1297.65906 | 2597.3338 | 2597.3440 | -3.9 | -2 |          |                    |             |                 | m/z                 |                                                                                                                                                                                                                                                                                                                                             |
| 70-77          | AAUUmCAG>p                                                  | 41.19 | 15500 | 1303.16821 | 2608.3521 | 2608.3600 | -3.0 | -2 | a6       | c3-c7              | w2,w4       | y2-y7           | manually identified |                                                                                                                                                                                                                                                                                                                                             |
| 70-77          | AAUUmCAGp                                                   | 40.31 | 24100 | 1312.17224 | 2626.3601 | 2626.3705 | -4.0 | -2 | a5       | c3,c4,c7           | -           | y4,y6,y7        | manually identified | The placement of methyl residue was deduced from its 2'3' cyclic form.                                                                                                                                                                                                                                                                      |
| 79-86          | ACACAUUG>p                                                  | 35.78 | 39200 | 1276.15813 | 2554.3279 | 2554.3382 | -4.0 | -2 | -        | c2,c3,c5,c6        | w3-w5       | y2,y3,y6        | manually identified |                                                                                                                                                                                                                                                                                                                                             |
| 79-86          | ACACAUUGp                                                   | 34.66 | 11000 | 1285.16101 | 2572.3377 | 2572.3467 | -4.3 | -2 |          |                    |             |                 | m/z                 |                                                                                                                                                                                                                                                                                                                                             |
| 87-93          | AUCAUCG>p                                                   | 36.87 | 35500 | 1111.63062 | 2225.2769 | 2225.2857 | -3.9 | -2 | a3-a6    | c2,c4-c6           | w1,w2,w4,w6 | y2-y6           | Ariadne             |                                                                                                                                                                                                                                                                                                                                             |
| 87-93          | AUCAUCGp                                                    | 35.56 | 4000  | 1120.63562 | 2243.2869 | 2243.2962 | -4.2 | -2 |          |                    |             |                 | m/z                 |                                                                                                                                                                                                                                                                                                                                             |
| 94-101         | ACACUUCG>p                                                  | 34.48 | 27400 | 1264.15125 | 2530.3182 | 2530.3269 | -3.5 | -2 | a4       | c2,c3,c5-c7        | w1,w4-w6    | y2,y3,y5-y7     | Ariadne             |                                                                                                                                                                                                                                                                                                                                             |
| 94-101         | ACACUUCGp                                                   | 33.41 | 5850  | 1273.15576 | 2548.3272 | 2548.3375 | -4.1 | -2 |          |                    |             |                 | m/z                 |                                                                                                                                                                                                                                                                                                                                             |
| 106-111        | CACUUG>p                                                    | 31.60 | 7440  | 947.10553  | 1896.2267 | 1896.2331 | -3.4 | -2 |          |                    |             |                 | m/z                 |                                                                                                                                                                                                                                                                                                                                             |
| 1-4            | m <sub>2</sub> <sup>2,2,7</sup> GpppAmUmCG>p                | 32.31 | 24200 | 929.10059  | 1860.2168 | 1860.2249 | -4.3 | -2 | -        | -                  | -           | y1              | manually identified | M-B(m <sub>2</sub> <sup>2,2,7</sup> G), M-B(m <sub>2</sub> <sup>2,2,7</sup> G)-H; O, M-m <sub>2</sub> <sup>2,2,7</sup> Gp, M-m <sub>2</sub> <sup>2,2,7</sup> Gpp, m <sub>2</sub> <sup>2,2,7</sup> Gp and m <sub>2</sub> <sup>2,2,7</sup> Gpp were identified in the MS/MS spectrum. The trimethyuanine structure was also identified by the |
| 1-4            | m <sub>2</sub> <sup>2,2,7</sup> GpppAmUmCGp                 | 31.26 | 3770  | 938.10419  | 1878.2240 | 1878.2355 | -6.1 | -2 |          |                    |             |                 | m/z                 | The trimethyuanine structure and the placement of methyl residue were deduced from its 2'3' cyclic form.                                                                                                                                                                                                                                    |
| 37-42          | UAUCmUG>p                                                   | 26.37 | 52400 | 954.60645  | 1911.2286 | 1911.2328 | -2.2 | -2 | a2-a5    | c1-c5              | w1-w5       | y2-y5           | Ariadne             | This study identified the methyl residue on the ribose, because not M-B4(mC) but M-B4(C) ion was identified in the MS/MS spectrum. The placement of methyl residue was also identified by the                                                                                                                                               |
| 37-42          | UAUCmUGp                                                    | 25.32 | 3550  | 963.61053  | 1929.2367 | 1929.2434 | -3.5 | -2 |          |                    |             |                 | m/z                 | The placement of methyl residue was deduced from its 2'3' cyclic form.                                                                                                                                                                                                                                                                      |
| 43-52          | UUCUmAUCAG>p or UUCUmAUCAG>p                                | 31.84 | 14300 | 1051.44739 | 3157.3656 | 3157.3772 | -3.7 | -3 | a4,a9    | c2-c4,c6-c9        | w2,w4,w7    | y2,y3,y6-y9     | Ariadne             | The placement of methyl residue was also identified by the previous study <sup>9</sup> .                                                                                                                                                                                                                                                    |
| 43-52          | UUCUmAUCAGp or UUCUmAUCAGp                                  | 30.91 | 11900 | 1057.45129 | 3175.3773 | 3175.3878 | -3.3 | -3 | a3       | c2-c4,c6-c9        | w2,w6       | y1,y2,y4,y6-y9  | manually identified | The placement of methyl residue was also identified by the previous study <sup>9</sup> .                                                                                                                                                                                                                                                    |
| 53-63          | UUUAUAUCmUG>p or UUUAUAUCUmG>p                              | 34.35 | 23700 | 1161.45850 | 3487.3990 | 3487.4138 | -4.2 | -3 | a2       | c2-c8,c10          | w4,w6       | y3,y5-y8,y10    | Ariadne             | The placement of methyl residue was also identified by the previous study <sup>9</sup> .                                                                                                                                                                                                                                                    |
| 53-63          | UUUAUAUCmUGp or UUUAUAUCUmGp                                | 34.01 | 10900 | 1167.46191 | 3505.4092 | 3505.4243 | -4.3 | -3 | -        | c3,c8,c10          | -           | y3,y4,y7        | manually identified | The placement of methyl residue was also identified by the previous study <sup>9</sup> .                                                                                                                                                                                                                                                    |
| 64-68          | AUACG>p                                                     | 33.90 | 14000 | 806.09821  | 1614.2121 | 1614.2191 | -4.3 | -2 | a4       | c2-c4              | w1,w2       | y1-y4           | Ariadne             |                                                                                                                                                                                                                                                                                                                                             |
| 64-68          | AUACGp                                                      | 31.48 | 1770  | 815.10400  | 1632.2237 | 1632.2296 | -3.7 | -2 |          |                    |             |                 | m/z                 |                                                                                                                                                                                                                                                                                                                                             |
| 69-79          | UCCUUAUCCG>p                                                | 31.26 | 5830  | 1140.12537 | 3423.3996 | 3423.4076 | -2.3 | -3 |          |                    |             |                 | m/z                 |                                                                                                                                                                                                                                                                                                                                             |
| 99-105         | AUUUUUG>p                                                   | 34.22 | 49000 | 1101.10022 | 2204.2161 | 2204.2265 | -4.7 | -2 | a4-a6    | c2-c6              | -           | y2-y6           | Ariadne             |                                                                                                                                                                                                                                                                                                                                             |
| 99-105         | AUUUUUGp                                                    | 32.85 | 31900 | 1110.10596 | 2222.2276 | 2222.2370 | -4.3 | -2 | a4,a7    | c2-c6              | w2,w3,w6    | y2-y6           | Ariadne             |                                                                                                                                                                                                                                                                                                                                             |
| 116-118        | AUG>p                                                       | 28.24 | 19300 | 979.11414  | 980.1220  | 980.1253  | -3.4 | -1 | -        | c2                 | w1,w2       | y1,y2           | manually identified |                                                                                                                                                                                                                                                                                                                                             |
| 116-118        | AUGp                                                        | 26.02 | 1530  | 997.12604  | 998.1339  | 998.1358  | -2.0 | -1 |          |                    |             |                 | m/z                 |                                                                                                                                                                                                                                                                                                                                             |
| 120-124        | AAUAG>p                                                     | 36.83 | 10200 | 818.10370  | 1638.2231 | 1638.2303 | -4.4 | -2 | a2,a4    | c1-c4              | w1,w3       | y1-y4           | manually identified |                                                                                                                                                                                                                                                                                                                                             |
| 120-124        | AAUAGp                                                      | 35.47 | 7100  | 827.10901  | 1656.2337 | 1656.2409 | -4.3 | -2 |          |                    |             |                 | m/z                 |                                                                                                                                                                                                                                                                                                                                             |
| 128-131        | CUUG>p                                                      | 25.77 | 4210  | 630.06085  | 1262.1374 | 1262.1393 | -1.6 | -2 |          |                    |             |                 | m/z                 |                                                                                                                                                                                                                                                                                                                                             |
| 132-136        | CUCCG>p                                                     | 26.10 | 13100 | 782.08783  | 1566.1913 | 1566.1966 | -3.4 | -2 | a2-a4    | c2-c4              | w1-w4       | y1-y4           | Ariadne             |                                                                                                                                                                                                                                                                                                                                             |
| 137-147        | UCCACUCCACG>p                                               | 31.26 | 29600 | 1147.47217 | 3445.4400 | 3445.4508 | -3.1 | -3 | a5,a7    | c2-c7,c9,c10       | w2,w4       | y4,y5,y7,y8,y10 | Ariadne             |                                                                                                                                                                                                                                                                                                                                             |
| 137-147        | UCCACUCCACGp                                                | 30.60 | 2460  | 1153.47424 | 3463.4462 | 3463.4614 | -4.4 | -3 |          |                    |             |                 | m/z                 |                                                                                                                                                                                                                                                                                                                                             |
| 148-152        | CAUCG>p                                                     | 29.07 | 35400 | 794.09375  | 1590.2032 | 1590.2078 | -2.9 | -2 | a3,a4    | c3,c4              | w1,w3,w4    | y1-y4           | Ariadne             |                                                                                                                                                                                                                                                                                                                                             |
| 148-152        | CAUCGp                                                      | 27.24 | 3180  | 803.09912  | 1608.2139 | 1608.2184 | -2.8 | -2 |          |                    |             |                 | m/z                 |                                                                                                                                                                                                                                                                                                                                             |

|   |    |              |                           |       |       |            |           |           |      |    |       |             |             |             |                     |                                                                                                                                                                                                            |
|---|----|--------------|---------------------------|-------|-------|------------|-----------|-----------|------|----|-------|-------------|-------------|-------------|---------------------|------------------------------------------------------------------------------------------------------------------------------------------------------------------------------------------------------------|
|   |    | 153-157      | ACCUG>p                   | 31.26 | 37200 | 794.09387  | 1590.2034 | 1590.2078 | -2.8 | -2 | a2-a4 | c1-c4       | w1-w4       | y1-y4       | Ariadne             |                                                                                                                                                                                                            |
|   |    | 153-157      | ACCUGp                    | 29.82 | 7140  | 803.09900  | 1608.2137 | 1608.2184 | -3.0 | -2 |       |             |             |             | m/z                 |                                                                                                                                                                                                            |
|   |    | 159-163      | UAUUG>p                   | 30.60 | 57600 | 795.07703  | 1592.1697 | 1592.1759 | -3.9 | -2 | a3,a4 | c2-c4       | w1-w3       | y1-y4       | Ariadne             |                                                                                                                                                                                                            |
|   |    | 159-163      | UAUUGp                    | 28.94 | 9620  | 804.08331  | 1610.1823 | 1610.1864 | -2.6 | -2 |       |             |             |             | m/z                 |                                                                                                                                                                                                            |
|   |    | 167-175      | UACCUCCA>p                | 32.31 | 24200 | 1416.66968 | 2835.3550 | 2835.3682 | -4.7 | -2 | a3-a6 | c4-c6,c8    | w2,w3,w5,w6 | y2-y6       | Ariadne             |                                                                                                                                                                                                            |
|   |    | 167-175      | UACCUCCA>p                | 31.48 | 25100 | 1425.67529 | 2853.3662 | 2853.3788 | -4.4 | -2 | a3,a6 | c3,c5,c6,c8 | w2-w4,w6    | y2-y6,y8    | Ariadne             |                                                                                                                                                                                                            |
|   |    | 177-180      | AACG>p                    | 34.68 | 27700 | 653.08661  | 1308.1889 | 1308.1938 | -3.7 | -2 | a3    | c1,c3       | w1,w2       | y1-y3       | manually identified |                                                                                                                                                                                                            |
|   |    | 184-188      | CACCA-OH                  | 29.91 | 49300 | 754.62726  | 1511.2702 | 1511.2731 | -2.0 | -2 | a2-a5 | c1-c4       | w1-w4       | y2-y4       | Ariadne             |                                                                                                                                                                                                            |
|   |    | 4-7          | CUUG>p                    | 28.74 | 1070  | 629.56708  | 1261.1498 | 1261.1553 | -4.4 | -2 |       |             |             |             | m/z                 |                                                                                                                                                                                                            |
|   |    | 8-12         | CUUCG>p                   | 28.06 | 1220  | 782.58075  | 1567.1772 | 1567.1806 | -2.2 | -2 |       |             |             |             | m/z                 |                                                                                                                                                                                                            |
|   |    | 14-16        | CAG>p                     | 24.29 | 1540  | 978.13098  | 979.1388  | 979.1412  | -2.5 | -1 |       |             |             |             | m/z                 |                                                                                                                                                                                                            |
|   |    | 35-38        | AACG>p                    | 34.68 | 27700 | 653.08661  | 1308.1889 | 1308.1938 | -3.7 | -2 | a3    | c1,c3       | w1,w2       | y1-y3       | manually identified |                                                                                                                                                                                                            |
|   |    | 35-38        | AACGp                     | 33.49 | 895   | 1325.19592 | 1326.2037 | 1326.2043 | -0.4 | -1 |       |             |             |             | m/z                 |                                                                                                                                                                                                            |
|   |    | 39-44        | AUACm <sup>+</sup> AG>p   | 34.01 | 6170  | 977.63123  | 1957.2781 | 1957.2872 | -4.7 | -2 |       |             |             |             | m/z                 | The placement of methyl residue was deduced from its 3' phosphate form.                                                                                                                                    |
|   |    | 39-44        | AUACm <sup>+</sup> AGp    | 32.53 | 12600 | 986.63751  | 1975.2907 | 1975.2978 | -3.6 | -2 | a4    | c2-c5       | w2-w4       | y2-y5       | manually identified | This study identified the methyl residue on the base because m-B <sup>+</sup> (mA) ion was identified in the MS/MS spectrum. The configuration of methyl residue on the base was deduced from the previous |
|   |    | 47-49, 91-93 | AAG>p                     | 33.90 | 10400 | 1002.13983 | 1003.1477 | 1003.1525 | -4.8 | -1 | -     | c2          | w1          | y2          | manually identified |                                                                                                                                                                                                            |
|   |    | 47-49, 91-93 | AAGp                      | 31.48 | 7630  | 1020.15094 | 1021.1588 | 1021.1630 | -4.2 | -1 |       |             |             |             | m/z                 |                                                                                                                                                                                                            |
| 7 | U6 | 50-58        | AUUAmGmCAUG>p             | 39.75 | 21100 | 1463.18652 | 2928.3887 | 2928.4009 | -4.2 | -2 | a6    | c2,c3,c6,c8 | w3,w4       | y2-y4,y6-y8 | manually identified | The MS/MS spectrum shows two methyl residues between AS3 and G54. The placement of methyl residues were deduced from the previous study <sup>1</sup> .                                                     |
|   |    | 50-58        | AUUAmGmCAUGp              | 39.19 | 6350  | 1472.19226 | 2946.4002 | 2946.4115 | -3.8 | -2 |       |             |             |             | m/z                 | The placement of methyl residue was deduced from its 2'3' cyclic form.                                                                                                                                     |
|   |    | 60-65        | CmCmCmUG>p or CCmCmCmUG>p | 30.73 | 22000 | 955.63013  | 1913.2759 | 1913.2848 | -4.7 | -2 | a2,a4 | c2,c4,c5    | w1-w4       | y1-y4       | manually identified | The previous study <sup>1</sup> supports the structure CmCmCmUG>p.                                                                                                                                         |
|   |    | 60-65        | CmCmCmUGp                 | 29.82 | 3490  | 964.63708  | 1931.2898 | 1931.2954 | -2.9 | -2 |       |             |             |             | m/z                 | The placement of methyl residue was deduced from its 2'3' cyclic form.                                                                                                                                     |
|   |    | 73-75        | AUG>p                     | 28.24 | 19300 | 979.11414  | 980.1220  | 980.1253  | -3.4 | -1 | -     | c2          | w1,w2       | y1,y2       | manually identified |                                                                                                                                                                                                            |
|   |    | 73-75        | AUGp                      | 26.02 | 1530  | 997.12604  | 998.1339  | 998.1358  | -2.0 | -1 |       |             |             |             | m/z                 |                                                                                                                                                                                                            |
|   |    | 76-80        | ACmACG>p                  | 39.48 | 31900 | 812.61383  | 1627.2433 | 1627.2507 | -4.5 | -2 | a3,a4 | c2-c4       | w1-w4       | y1,y2,y4    | Ariadne             | The MS/MS spectrum shows that the fragment contains methyl residue on base or ribose. The configuration of the residue was deduced from the previous study <sup>1</sup> .                                  |
|   |    | 76-80        | ACmACGp                   | 38.00 | 1610  | 821.61902  | 1645.2537 | 1645.2613 | -4.6 | -2 |       |             |             |             | m/z                 | The placement of methyl residue was deduced from its 2'3' cyclic form.                                                                                                                                     |
|   |    | 81-88        | CAAAUUCG>p                | 34.35 | 25400 | 1276.15613 | 2554.3279 | 2554.3382 | -4.0 | -2 | a4,a6 | c2-c6       | w3-w5       | y3-y7       | Ariadne             |                                                                                                                                                                                                            |
|   |    | 81-88        | CAAAUUCGp                 | 34.35 | 5570  | 1285.16174 | 2572.3391 | 2572.3487 | -3.7 | -2 |       |             |             |             | m/z                 |                                                                                                                                                                                                            |
|   |    | 96-107       | UUCGAUUUUUU>p             | 34.35 | 18300 | 1237.78387 | 3716.3742 | 3716.3900 | -4.3 | -3 | -     | c2-c4,c6    | -           | y2          | manually identified |                                                                                                                                                                                                            |

Ram Reddy; Nucleic Acids Res. 1986; 14(Suppl): r61-r72. Compilation of small RNA sequences

Sontheimer EJ, Steltz JA.; Mol Cell Biol. 1992 Feb;12(2):734-46. Three novel functional variants of human U5 small nuclear RNA.

Jády BE, Darzaçá X, Tucker KE, Matera AG, Bertrand E, Kiss T.; EMBO J. 2003 Apr 15;22(8):1878-88. Modification of 5m small nuclear RNAs occurs in the nucleoplasmic Cajal body following import from the cytoplasm.

Supplementary Table 2. RNase T1 fragments of U1 snRNA identified by LC-MS analysis.

| Sequence of U1 snRNA |                         | AUACUUACCCGAGGGGAGAUACCAUGAUCACGAAGUGGUUUUCCAGGGCGAGGCUU<br>AUCCAUUGCACUCCGGGAUGUGCUGACCCUUGCGAUUUCCCAAUGUGGGAAACUCGACU<br>GCAUAAUUUGUGUAGUGGGGGACUGCCGUUCGCGUUUCCUG |           |              |              |                         |                            |                     |        |                          |                          |                          |                          |                       |                                                                                               |
|----------------------|-------------------------|----------------------------------------------------------------------------------------------------------------------------------------------------------------------|-----------|--------------|--------------|-------------------------|----------------------------|---------------------|--------|--------------------------|--------------------------|--------------------------|--------------------------|-----------------------|-----------------------------------------------------------------------------------------------|
| Residue number       | Identified sequences    | Retention time (min)                                                                                                                                                 | Intensity | Observed m/z | Observed m/z | Observed molecular mass | Theoretical molecular mass | $\Delta$ mass (ppm) | Charge | a-series ions identified | c-series ions identified | w-series ions identified | y-series ions identified | Identification method | Remarks                                                                                       |
| U1-tfs               |                         |                                                                                                                                                                      |           |              |              |                         |                            |                     |        |                          |                          |                          |                          |                       |                                                                                               |
| 1-11                 | mGpppmAmUmACUUACCCG>p   | 35.24                                                                                                                                                                | 128000    | 1343.15      | 1343.1451    | 4032.4589               | 4032.4728                  | -3.4                | -3     | -                        | c8-c10                   | w2                       | y2-y8                    | manually identified   | M-B(mG), M-B(mG)-H2O, M-mGp, M-mGpp and mGpp were identified in the MS/MS spectrum.           |
| 1-11                 | mGpppmAmUmACUUACCCGp    | 34.89                                                                                                                                                                | 31700     | 1349.15      | 1349.1489    | 4050.4703               | 4050.4833                  | -3.2                | -3     | -                        | c10                      | -                        | y2-y5                    | manually identified   | M-B(mG), M-B(mG)-H2O, M-mGp and M-mGpp were identified in the MS/MS spectrum.                 |
| 21-28                | AUACCAUG>p              | 35.59                                                                                                                                                                | 210000    | 1276.16      | 1276.1559    | 2554.3274               | 2554.3382                  | -4.2                | -2     | a4,a5                    | c2,c3,c5-c7              | w2-w5                    | y2-y7                    | Ariadne               |                                                                                               |
| 21-28                | AUACCAUGp               | 34.89                                                                                                                                                                | 60600     | 1285.16      | 1285.1620    | 2572.3396               | 2572.3487                  | -3.5                | -2     | a4,a5,a8                 | c2,c3,c5-c7              | w2-w6                    | y2-y7                    | Ariadne               |                                                                                               |
| 29-34                | AUCACG>p                | 37.81                                                                                                                                                                | 234000    | 958.62       | 958.6190     | 1919.2537               | 1919.2604                  | -3.5                | -2     | a3,a5                    | c2-c5                    | w1-w5                    | y1-y5                    | Ariadne               |                                                                                               |
| 29-34                | AUCACGp                 | 36.32                                                                                                                                                                | 26600     | 967.62       | 967.6249     | 1937.2654               | 1937.2709                  | -2.8                | -2     | a3,a5,a6                 | c1-c6                    | w1,w3,w5                 | y1-y5                    | Ariadne               |                                                                                               |
| 35-37                | AAG>p                   | 34.43                                                                                                                                                                | 24800     | 1002.14      | 1002.1416    | 1003.1494               | 1003.1525                  | -3.0                | -1     | -                        | c1,c2                    | w1,w2                    | y1,y2                    | manually identified   |                                                                                               |
| 35-37                | AAGp                    | 32.09                                                                                                                                                                | 14000     | 1020.15      | 1020.1531    | 1021.1610               | 1021.1630                  | -2.0                | -1     | -                        | a2                       | -                        | y1,y2                    | manually identified   |                                                                                               |
| 42-50                | UUUCCAG>p               | 33.30                                                                                                                                                                | 98700     | 1405.65      | 1405.6500    | 2813.3157               | 2813.3250                  | -3.3                | -2     | a5,a6                    | c2-c8                    | w2-w4,w7                 | y2-y8                    | Ariadne               |                                                                                               |
| 42-50                | UUUCCAGp                | 32.38                                                                                                                                                                | 51000     | 1414.65      | 1414.6545    | 2831.3247               | 2831.3356                  | -3.8                | -2     | a6,a9                    | c2-c6,c8                 | w2-w4,w7                 | y2-y8                    | Ariadne               |                                                                                               |
| 58-68                | CUUAUCCAUUG>p           | 34.04                                                                                                                                                                | 64100     | 1148.46      | 1148.4562    | 3448.3920               | 3448.4029                  | -3.1                | -3     | a6,a7                    | c2,c3,c5-c10             | w3-w5                    | y2-y10                   | Ariadne               |                                                                                               |
| 69-75                | CACUCCG>p               | 29.69                                                                                                                                                                | 100000    | 1099.13      | 1099.1340    | 2200.2837               | 2200.2904                  | -3.0                | -2     | a3-a6                    | c2-c6                    | w1,w2,w4-w6              | y2-y6                    | Ariadne               |                                                                                               |
| 69-75                | CACUCCGp                | 27.97                                                                                                                                                                | 19900     | 1108.14      | 1108.1392    | 2218.2940               | 2218.3010                  | -3.2                | -2     | a6,a7                    | c2-c6                    | w1,w2,w4-w6              | y1-y6                    | Ariadne               |                                                                                               |
| 77-79                | AUG>p                   | 28.89                                                                                                                                                                | 18100     | 979.12       | 979.1151     | 980.1229                | 980.1253                   | -2.4                | -1     | a2                       | c1,c2                    | w1                       | y1,y2                    | manually identified   |                                                                                               |
| 85-91                | ACCCUG>p                | 31.37                                                                                                                                                                | 131000    | 1099.14      | 1099.1354    | 2200.2864               | 2200.2904                  | -1.8                | -2     | a2-a6                    | c2-c6                    | w2-w6                    | y1-y6                    | Ariadne               |                                                                                               |
| 85-91                | ACCCUGp                 | 30.40                                                                                                                                                                | 35900     | 1108.14      | 1108.1397    | 2218.2950               | 2218.3010                  | -2.7                | -2     | a2-a5,a7                 | c2-c6                    | w3,w5,w6                 | y1-y6                    | Ariadne               |                                                                                               |
| 94-106               | AUUUCCCAAUG>p           | 36.32                                                                                                                                                                | 148000    | 1367.50      | 1367.4967    | 4105.5136               | 4105.5239                  | -2.5                | -3     | a6                       | c2-c12                   | w2-w5,w7                 | y2-y8,y10,y12            | Ariadne               |                                                                                               |
| 94-106               | AUUUCCCAAUGp            | 35.59                                                                                                                                                                | 33100     | 1373.50      | 1373.4973    | 4123.5154               | 4123.5344                  | -4.6                | -3     | -                        | c3-c6,c8,c9,c11          | w3                       | y2,y3,y12                | manually identified   |                                                                                               |
| 111-117              | AAACUCG>p               | 39.61                                                                                                                                                                | 188000    | 1123.15      | 1123.1450    | 2248.3057               | 2248.3129                  | -3.2                | -2     | a4,a6                    | c2-c6                    | w1-w6                    | y2-y6                    | Ariadne               |                                                                                               |
| 111-117              | AAACUCGp                | 38.35                                                                                                                                                                | 29800     | 1132.15      | 1132.1493    | 2266.3142               | 2266.3234                  | -4.1                | -2     | a4-a7                    | c2-c7                    | w1,w3-w6                 | y1-y6                    | Ariadne               |                                                                                               |
| 118-121, 143-146     | ACUG>p                  | 30.58                                                                                                                                                                | 10000     | 641.57       | 641.5739     | 1285.1634               | 1285.1665                  | -2.5                | -2     | a3                       | c2,c3                    | w1,w2                    | y1,y3                    | manually identified   |                                                                                               |
| 122-130              | CAUAAUUUG>p             | 35.59                                                                                                                                                                | 4530      | 1429.66      | 1429.6603    | 2861.3362               | 2861.3475                  | -3.9                | -2     | -                        | -                        | -                        | -                        | m/z                   |                                                                                               |
| U1 snRNA             |                         |                                                                                                                                                                      |           |              |              |                         |                            |                     |        |                          |                          |                          |                          |                       |                                                                                               |
| 1-11                 | mmmGpppmAmUmACUUACCCG>p | 37.18                                                                                                                                                                | 180000    | 1347.82      | 1347.8169    | 4046.4741               | 4046.4884                  | -3.5                | -3     | a9                       | c3,c6-c10                | w2,w3,w7                 | y2-y9                    | manually identified   | M-B(mmmG), M-B(mmmG)-H2O, M-mmmGp, M-mmmGpp and mmmGpp were identified in the MS/MS spectrum. |
| 1-11                 | mmmGpppmAmUmACUUACCCGp  | 36.87                                                                                                                                                                | 48100     | 1353.82      | 1353.8196    | 4064.4822               | 4064.4990                  | -4.1                | -3     | -                        | c3,c6,c7,c9,c10          | w3,w7,w8                 | y2-y8                    | manually identified   | M-B(mmmG), M-B(mmmG)-H2O, M-mmmGp, M-mmmGpp and mmmGpp were identified in the MS/MS spectrum. |
| 21-28                | AUACCAUG>p              | 37.40                                                                                                                                                                | 312000    | 1276.16      | 1276.1574    | 2554.3304               | 2554.3382                  | -3.1                | -2     | a3-a6                    | c2,c3,c5-c7              | w2-w5                    | y2-y7                    | Ariadne               |                                                                                               |
| 21-28                | AUACCAUGp               | 36.55                                                                                                                                                                | 99500     | 1285.16      | 1285.1604    | 2572.3365               | 2572.3487                  | -4.8                | -2     | a5,a8                    | c2,c3,c5-c7              | w2,w4,w5                 | y2,y3,y5-y7              | Ariadne               |                                                                                               |
| 29-34                | AUCACG>p                | 39.59                                                                                                                                                                | 469000    | 958.62       | 958.6197     | 1919.2550               | 1919.2604                  | -2.8                | -2     | a3-a5                    | c1-c5                    | w1-w5                    | y1-y5                    | Ariadne               |                                                                                               |
| 29-34                | AUCACGp                 | 37.94                                                                                                                                                                | 41800     | 967.62       | 967.6240     | 1937.2636               | 1937.2709                  | -3.8                | -2     | a3,a5,a6                 | c2-c6                    | w1-w4                    | y2-y5                    | Ariadne               |                                                                                               |
| 35-37                | AAG>p                   | 36.34                                                                                                                                                                | 30300     | 1002.14      | 1002.1412    | 1003.1491               | 1003.1525                  | -3.4                | -1     | -                        | c1,c2                    | w1,w2                    | y1,y2                    | manually identified   |                                                                                               |
| 42-50                | UUUCCAG>p               | 34.66                                                                                                                                                                | 183000    | 1405.65      | 1405.6491    | 2813.3138               | 2813.3250                  | -4.0                | -2     | a5,a6                    | c2-c4,c6,c8              | w2-w4                    | y2-y8                    | Ariadne               |                                                                                               |
| 42-50                | UUUCCAGp                | 33.77                                                                                                                                                                | 184000    | 1414.66      | 1414.6553    | 2831.3262               | 2831.3356                  | -3.3                | -2     | a5,a6,a9                 | c2-c8                    | w2-w4                    | y2-y8                    | Ariadne               |                                                                                               |
| 58-68                | CUUAUCCAUUG>p           | 35.56                                                                                                                                                                | 179000    | 1148.46      | 1148.4553    | 3448.3894               | 3448.4029                  | -3.9                | -3     | a6,a7                    | c2,c3,c5-c10             | w4-w6                    | y2-y10                   | Ariadne               |                                                                                               |
| 58-68                | CUUAUCCAUUGp            | 34.66                                                                                                                                                                | 36500     | 1154.46      | 1154.4584    | 3466.3986               | 3466.4134                  | -4.3                | -3     | a11                      | c2,c3,c5-c8              | w3                       | y2-y7,y10                | Ariadne               |                                                                                               |
| 69-75                | CACUCCG>p               | 31.33                                                                                                                                                                | 32300     | 1099.13      | 1099.1346    | 2200.2849               | 2200.2904                  | -2.5                | -2     | a3-a6                    | c2-c6                    | w2-w6                    | y2-y6                    | Ariadne               |                                                                                               |
| 69-75                | CAmCUCCG>p              | 35.11                                                                                                                                                                | 240000    | 1106.14      | 1106.1416    | 2214.2989               | 2214.3061                  | -3.3                | -2     | a2-a6                    | c2-c6                    | w1,w2,w4,w6              | y2,y3                    | Ariadne               |                                                                                               |
| 69-75                | CAmCUCCGp               | 33.77                                                                                                                                                                | 67600     | 1115.15      | 1115.1467    | 2232.3091               | 2232.3166                  | -3.4                | -2     | a3-a7                    | c3-c6                    | w2,w4                    | y1-y4,y6                 | Ariadne               |                                                                                               |
| 77-79                | AUG>p                   | 30.63                                                                                                                                                                | 39400     | 979.11       | 979.1136     | 980.1214                | 980.1253                   | -3.9                | -1     | -                        | c2                       | w1,w2                    | y1,y2                    | manually identified   |                                                                                               |
| 85-91                | ACCCUG>p                | 33.09                                                                                                                                                                | 295000    | 1099.13      | 1099.1338    | 2200.2832               | 2200.2904                  | -3.3                | -2     | a2-a6                    | c2-c6                    | w2-w6                    | y2-y6                    | Ariadne               |                                                                                               |
| 85-91                | ACCCUGp                 | 32.22                                                                                                                                                                | 52500     | 1108.14      | 1108.1381    | 2218.2918               | 2218.3010                  | -4.1                | -2     | a3-a5,a7                 | c2-c6                    | w2-w5                    | y1-y6                    | Ariadne               |                                                                                               |
| 94-106               | AUUUCCCAAUG>p           | 38.12                                                                                                                                                                | 216000    | 1367.49      | 1367.4944    | 4105.5066               | 4105.5239                  | -4.2                | -3     | a5,a6,a8                 | c2-c10,c12               | w2-w6,w12                | y2-y12                   | Ariadne               |                                                                                               |
| 111-117              | AAACUCG>p               | 41.19                                                                                                                                                                | 204000    | 1123.14      | 1123.1447    | 2248.3050               | 2248.3129                  | -3.5                | -2     | a4-a6                    | c2-c6                    | w1,w3-w6                 | y2-y6                    | Ariadne               |                                                                                               |

|                  |              |       |        |         |           |           |           |      |    |          |             |             |             |                     |
|------------------|--------------|-------|--------|---------|-----------|-----------|-----------|------|----|----------|-------------|-------------|-------------|---------------------|
| 111-117          | AAACUCGp     | 40.31 | 34300  | 1132.15 | 1132.1489 | 2266.3135 | 2266.3234 | -4.4 | -2 | a4,a6,a7 | c2-c6       | w1,w3-w5    | y2-y6       | Ariadne             |
| 118-121, 143-146 | ACUG>p       | 32.22 | 79600  | 1284.15 | 1284.1537 | 1285.1615 | 1285.1665 | -3.9 | -1 | a2,a3    | c3          | w1-w3       | y2,y3       | Ariadne             |
| 122-130          | CAUAAUUUG>p  | 37.40 | 131000 | 1429.66 | 1429.6608 | 2861.3372 | 2861.3475 | -3.6 | -2 | a5       | c2-c5,c8    | w4,w5,w7,w8 | y2-y8       | Ariadne             |
| 122-130          | CAUAAUUUGp   | 36.34 | 54200  | 1438.67 | 1438.6659 | 2879.3474 | 2879.3581 | -3.7 | -2 | a5,a9    | c3-c7       | w3-w5,w8    | y2-y6,y8    | Ariadne             |
| 149-152          | UUCG         | 27.93 | 27600  | 1261.13 | 1261.1288 | 1262.1366 | 1262.1393 | -2.2 | -1 | a3       | c2,c3       | w2,w3       | y2,y3       | Ariadne             |
| 155-164          | CUUCCCCUG-OH | 33.41 | 92900  | 1009.79 | 1009.7889 | 3032.3901 | 3032.3993 | -3.0 | -3 | a5,a6,a8 | c2,c6,c7    | w2,w4,w9    | y2-y9       | Ariadne             |
| 155-164          | CUUCCCCUG>p  | 31.95 | 14600  | 1030.44 | 1030.4412 | 3094.3470 | 3094.3551 | -2.6 | -3 | a5       | c2,c4,c5-c9 | w2-w4       | y3-y5,y7,y8 | manually identified |



**Supplementary Table 3. U1-tfs sequence determined by 3'RACE analysis.**

| <i>Clone #</i> | <i>U1-Tfs sequence</i>                                                                                                         | <i>Length</i> | <i>Extended Sequence</i> |
|----------------|--------------------------------------------------------------------------------------------------------------------------------|---------------|--------------------------|
| 1              | ATACTTACCTGGCAGGGGAGATACCATGATCACGAAGGTGGTTTTCCAGGGCGAGGCTTATCCATTGCACTCCGGATGTGCTGACCCCTGCGATTTCCCCAAATGTGGGAAACTCGA          | 118           | TTT                      |
| 2              | ATACTTACCTGGCAGGGGAGATACCATGATCACGAAGGTGGTTTTCCAGGGCGAGGCTTATCCATTGCACTCCGGATGTGCTGACCCCTGCGATTTCCCCAAATGTGGGAAACTCGACTG       | 121           | -                        |
| 3              | ATACTTACCTGGCAGGGGAGATACCATGATCACGAAGGTGGTTTTCCAGGGCGAGGCTTATCCATTGCACTCCGGATGTGCTGACCCCTGCGATTTCCCCAAATGTGGGAAACTCGACTGC      | 122           | -                        |
| 4              | ATACTTACCTGGCAGGGGAGATACCATGATCACGAAGGTGGTTTTCCAGGGCGAGGCTTATCCATTGCACTCCGGATGTGCTGACCCCTGCGATTTCCCCAAATGTGGGAAACTCGACTGC      | 122           | AAAT                     |
| 5              | ATACTTACCTGGCAGGGGAGATACCATGATCACGAAGGTGGTTTTCCAGGGCGAGGCTTATCCATTGCACTCCGGATGTGCTGACCCCTGCGATTTCCCCAAATGTGGGAAACTCGACTGCA     | 123           | -                        |
| 6              | ATACTTACCTGGCAGGGGAGATACCATGATCACGAAGGTGGTTTTCCAGGGCGAGGCTTATCCATTGCACTCCGGATGTGCTGACCCCTGCGATTTCCCCAAATGTGGGAAACTCGACTGCA     | 123           | A                        |
| 7              | ATACTTACCTGGCAGGGGAGATACCATGATCACGAAGGTGGTTTTCCAGGGCGAGGCTTATCCATTGCACTCCGGATGTGCTGACCCCTGCGATTTCCCCAAATGTGGGAAACTCGACTGCA     | 123           | -                        |
| 8              | ATACTTACCTGGCAGGGGAGATACCATGATCACGAAGGTGGTTTTCCAGGGCGAGGCTTATCCATTGCACTCCGGATGTGCTGACCCCTGCGATTTCCCCAAATGTGGGAAACTCGACTGCA     | 123           | A                        |
| 9              | ATACTTACCTGGCAGGGGAGATACCATGATCACGAAGGTGGTTTTCCAGGGCGAGGCTTATCCATTGCACTCCGGATGTGCTGACCCCTGCGATTTCCCCAAATGTGGGAAACTCGACTGCA     | 123           | -                        |
| 10             | ATACTTACCTGGCAGGGGAGATACCATGATCACGAAGGTGGTTTTCCAGGGCGAGGCTTATCCATTGCACTCCGGATGTGCTGACCCCTGCGATTTCCCCAAATGTGGGAAACTCGACTGCA     | 123           | -                        |
| 11             | ATACTTACCTGGCAGGGGAGATACCATGATCACGAAGGTGGTTTTCCAGGGCGAGGCTTATCCATTGCACTCCGGATGTGCTGACCCCTGCGATTTCCCCAAATGTGGGAAACTCGACTGCA     | 123           | -                        |
| 12             | ATACTTACCTGGCAGGGGAGATACCATGATCACGAAGGTGGTTTTCCAGGGCGAGGCTTATCCATTGCACTCCGGATGTGCTGACCCCTGCGATTTCCCCAAATGTGGGAAACTCGACTGCAT    | 124           | -                        |
| 13             | ATACTTACCTGGCAGGGGAGATACCATGATCACGAAGGTGGTTTTCCAGGGCGAGGCTTATCCATTGCACTCCGGATGTGCTGACCCCTGCGATTTCCCCAAATGTGGGAAACTCGACTGCAT    | 124           | -                        |
| 14             | ATACTTACCTGGCAGGGGAGATACCATGATCACGAAGGTGGTTTTCCAGGGCGAGGCTTATCCATTGCACTCCGGATGTGCTGACCCCTGCGATTTCCCCAAATGTGGGAAACTCGACTGCAT    | 124           | TT                       |
| 15             | ATACTTACCTGGCAGGGGAGATACCATGATCACGAAGGTGGTTTTCCAGGGCGAGGCTTATCCATTGCACTCCGGATGTGCTGACCCCTGCGATTTCCCCAAATGTGGGAAACTCGACTGCAT    | 124           | T                        |
| 16             | ATACTTACCTGGCAGGGGAGATACCATGATCACGAAGGTGGTTTTCCAGGGCGAGGCTTATCCATTGCACTCCGGATGTGCTGACCCCTGCGATTTCCCCAAATGTGGGAAACTCGACTGCAT    | 124           | -                        |
| 17             | ATACTTACCTGGCAGGGGAGATACCATGATCACGAAGGTGGTTTTCCAGGGCGAGGCTTATCCATTGCACTCCGGATGTGCTGACCCCTGCGATTTCCCCAAATGTGGGAAACTCGACTGCAT    | 124           | TT                       |
| 18             | ATACTTACCTGGCAGGGGAGATACCATGATCACGAAGGTGGTTTTCCAGGGCGAGGCTTATCCATTGCACTCCGGATGTGCTGACCCCTGCGATTTCCCCAAATGTGGGAAACTCGACTGCAT    | 124           | -                        |
| 19             | ATACTTACCTGGCAGGGGAGATACCATGATCACGAAGGTGGTTTTCCAGGGCGAGGCTTATCCATTGCACTCCGGATGTGCTGACCCCTGCGATTTCCCCAAATGTGGGAAACTCGACTGCAT    | 124           | -                        |
| 20             | ATACTTACCTGGCAGGGGAGATACCATGATCACGAAGGTGGTTTTCCAGGGCGAGGCTTATCCATTGCACTCCGGATGTGCTGACCCCTGCGATTTCCCCAAATGTGGGAAACTCGACTGCATAAT | 127           | -                        |

Supplementary Table 4. RNase T1 fragments of RAT-U1 snRNA and RAT-U1-tfs identified by LC-MS analysis.

|                                 | MW(theo) 3P |          | RAT-WT  |        |         |            |            | RAT-U1-tfs ( $\Delta$ SL4-1) |        |         |            |           | RAT-U1-tfs ( $\Delta$ SL4-1 $\Delta$ 3' box) |        |         |            |           |
|---------------------------------|-------------|----------|---------|--------|---------|------------|------------|------------------------------|--------|---------|------------|-----------|----------------------------------------------|--------|---------|------------|-----------|
|                                 | m/z(theo) 3 |          | m/z     | charge | MW(obs) | error(ppm) | peak area  | m/z                          | charge | MW(obs) | error(ppm) | peak area | m/z                                          | charge | MW(obs) | error(ppm) | peak area |
| MMG-mAmUmACUUACCUG (extra 1-11) | 4050.48334  | 1349.153 |         |        | 0.00    |            | 0          | 1349.15                      | 3      | 4050.48 | -0.07      | 386,431   | 1349.15                                      | 3      | 4050.48 | -0.61      | 429,854   |
| MMG-AmUmACUUACCUG (extra 1-11)  | 4036.46769  | 1344.481 | 1344.48 | 3      | 4036.47 | 0.75       | 66,051     | 1344.48                      | 3      | 4036.47 | 0.30       | 389,639   | 1344.48                                      | 3      | 4036.47 | 0.03       | 472,162   |
| TMG-AmUmACUUACCUG (extra 1-11)  | 4064.49899  | 1353.825 | 1353.83 | 3      | 4064.50 | 0.38       | 25,987,977 |                              |        | 0.00    |            | 0         |                                              |        | 0.00    |            | 0         |
| UAAG (RAT-tag)                  | 1327.18835  | 662.586  | 662.59  | 2      | 1327.19 | 0.12       | 9,052,113  | 662.59                       | 2      | 1327.19 | 0.40       | 217,922   | 662.59                                       | 2      | 1327.19 | 0.12       | 283,997   |
| UUUUAUUG (RAT-tag)              | 2551.28956  | 1274.637 | 1274.64 | 2      | 2551.29 | 0.29       | 40,973,436 | 1274.64                      | 2      | 2551.29 | -0.28      | 957,070   | 1274.64                                      | 2      | 2551.29 | -0.28      | 1,259,063 |
| AAACCCUUAG (RAT-tag)            | 3206.44255  | 1602.213 | 1602.21 | 2      | 3206.45 | 0.95       | 18,819,149 | 1602.21                      | 2      | 3206.44 | -0.28      | 379,600   | 1602.21                                      | 2      | 3206.44 | -0.43      | 563,384   |
| CACG (RAT-tag)                  | 1302.19310  | 650.089  | 650.09  | 2      | 1302.19 | -0.07      | 6,968,917  | 650.09                       | 2      | 1302.19 | 0.13       | 228,984   | 650.09                                       | 2      | 1302.19 | 0.32       | 326,470   |
| UUUAG (RAT-tag)                 | 1610.18643  | 804.085  | 804.09  | 2      | 1610.19 | -0.22      | 34,292,280 | 804.09                       | 2      | 1610.19 | 0.22       | 905,204   | 804.09                                       | 2      | 1610.19 | 0.00       | 1,108,862 |
| CUACACUCG (RAT-tag)             | 2853.37880  | 1425.682 | 1425.68 | 2      | 2853.38 | 0.39       | 32,668,520 | 1425.68                      | 2      | 2853.38 | -0.64      | 789,653   | 1425.68                                      | 2      | 2853.38 | -0.04      | 1,016,937 |
| CCAUCG (RAT-tag)                | 1913.25969  | 955.622  | 955.62  | 2      | 1913.26 | -0.13      | 34,994,143 | 955.62                       | 2      | 1913.26 | 0.12       | 922,409   | 955.62                                       | 2      | 1913.26 | 0.18       | 1,161,596 |
| AUAUACUUACCUG (RAT-tag + 1-11)  | 4124.51846  | 1373.832 | 1373.83 | 3      | 4124.52 | 0.45       | 32,360,374 | 1373.83                      | 3      | 4124.52 | 0.27       | 736,470   | 1373.83                                      | 3      | 4124.52 | 0.09       | 1,061,248 |
| AUACCAUG (21-28)                | 2572.34874  | 1285.167 | 1285.17 | 2      | 2572.35 | -0.22      | 35,565,762 | 1285.17                      | 2      | 2572.35 | 0.06       | 856,819   | 1285.17                                      | 2      | 2572.35 | 0.06       | 1,039,071 |
| AUCACG (29-34)                  | 1937.27092  | 967.628  | 967.63  | 2      | 1937.27 | -0.33      | 46,959,087 | 967.63                       | 2      | 1937.27 | 0.30       | 908,604   | 967.63                                       | 2      | 1937.27 | 0.37       | 1,070,924 |
| UUUUCCAG (42-50)                | 2831.33560  | 1414.660 | 1414.66 | 2      | 2831.34 | -0.04      | 34,245,570 | 1414.66                      | 2      | 2831.34 | 0.22       | 912,751   | 1414.66                                      | 2      | 2831.33 | -0.21      | 1,045,754 |
| CUUAUCCAUG (58-68)              | 3466.41342  | 1154.463 | 1154.46 | 3      | 3466.41 | 0.38       | 31,859,915 | 1154.46                      | 3      | 3466.41 | 0.16       | 855,120   | 1154.46                                      | 3      | 3466.41 | 0.06       | 988,452   |
| CACUCCG (69-75)                 | 2218.30097  | 1108.143 | 1108.14 | 2      | 2218.30 | 0.25       | 27,471,833 | 1108.14                      | 2      | 2218.30 | 0.03       | 957,783   | 1108.14                                      | 2      | 2218.30 | 0.03       | 1,204,205 |
| CAmCUCCG (69-75)                | 2232.31662  | 1115.150 | 1115.15 | 2      | 2232.32 | -0.30      | 18,196,960 |                              |        | 0.00    | 0          |           |                                              | 0.00   |         | 0          |           |
| ACCCUG (85-91)                  | 2218.30097  | 1108.143 | 1108.14 | 2      | 2218.30 | -0.07      | 41,051,525 | 1108.14                      | 2      | 2218.30 | -0.41      | 985,162   | 1108.14                                      | 2      | 2218.30 | 0.14       | 1,233,827 |
| AUUUCCCAAUG (94-106)            | 4123.53445  | 1373.504 | 1373.50 | 3      | 4123.54 | 0.45       | 34,902,502 | 1373.50                      | 3      | 4123.53 | -0.35      | 818,043   | 1373.50                                      | 3      | 4123.54 | 0.36       | 1,115,898 |
| AAACUCG (111-117)               | 2266.32344  | 1132.154 | 1132.15 | 2      | 2266.32 | 0.36       | 53,256,812 | 1132.15                      | 2      | 2266.32 | 0.14       | 1,102,700 | 1132.15                                      | 2      | 2266.32 | 0.67       | 1,599,974 |
| ACUG (118-121, 143-146)         | 1303.17711  | 650.581  | 650.58  | 2      | 1303.18 | -0.72      | 11,904,708 | 650.58                       | 2      | 1303.18 | -1.38      | 241,130   | 650.58                                       | 2      | 1303.18 | -1.09      | 321,241   |
| CAUAAUUUG (122-130)             | 2879.35806  | 1438.671 | 1438.67 | 2      | 2879.36 | 0.38       | 36,201,312 |                              |        | 0.00    | 0          |           |                                              | 0.00   |         | 0          |           |
| UUCG (149-152)                  | 1280.14989  | 639.067  | 639.07  | 2      | 1280.15 | -0.07      | 6,336,554  |                              |        | 0.00    | 0          |           |                                              | 0.00   |         | 0          |           |
| CUUUCUUUGp (155-164)            | 3112.36565  | 1036.447 | 1036.45 | 3      | 3112.37 | 0.00       | 12,588,459 |                              |        | 0.00    | 0          |           |                                              | 0.00   |         | 0          |           |
| CUUUCUUUG-OH (155-164)          | 3032.39932  | 1009.792 | 1009.79 | 3      | 3032.40 | 0.53       | 10,123,336 |                              |        | 0.00    | 0          |           |                                              | 0.00   |         | 0          |           |

Supplementary Table 5. U1 genes and their homologs present in the human genome\*.

| Chromosome | Direction | Accession number | Distal sequence element (DSE) |         |         | Proximal sequence element (PSE) |          |          | Sequence                                                                                                                                                  | U1 coding sequence |          |                | Blast search result |                |             | 3' box  |          |       |
|------------|-----------|------------------|-------------------------------|---------|---------|---------------------------------|----------|----------|-----------------------------------------------------------------------------------------------------------------------------------------------------------|--------------------|----------|----------------|---------------------|----------------|-------------|---------|----------|-------|
|            |           |                  | Sequence                      | Start   | End     | Sequence                        | Start    | End      |                                                                                                                                                           | Start              | End      | Position       | Position            | Position       | Identifiers | Expect  | Sequence | Start |
| 1          | reverse   | NT_113797.1      |                               |         |         | AAGTGACCGTGCCTGTA               | 2716     | 2699     | ATACTTACCTGGCAGGGAGATACCATGATCACGAAGTGGTTTTCCAGGGGAGGCTTATCCATGCACCTCCGATGTGCTGACCCCTGCCGTTCCCAAAATGGGAAACTCGACTGCATAATTTGGTAGTGGGGACTGCGTTCGCCCTGTCCCTG  | 2652               | 2489     | 159/165 (97%)  | 1E-70               |                |             |         |          |       |
| 1          | reverse   | NT_113797.1      | GCGCACTTCTATGATAGTA           | 28982   | 28963   |                                 |          |          | ATATTTACTTGGCAGGGAGATACCATGATCACGAAGTGGTTTTCCAGGGGAGGCTTATCCATGCACCTCCGATGTGCTGACCCCTGCCGTTCCCAAAATGGGAAACTCGACTGCATAATTTGGTAGTGGGGACTGCGTTCGCCCTGTCCCTG  | 28765              | 28604    | 159/164 (95%)  | 5E-65               |                |             |         |          |       |
| 1          | forward   | NT_113799.1      | GCGCACTTCTATGATAGTA           | 65184   | 65203   | AAGTGACCGTGCCTGTA               | 65363    | 65381    | ATACTTACCTGGCAGGGAGATACCATGATCACGAAGTGGTTTTCCAGGGGAGGCTTATCCATGCACCTCCGATGTGCTGACCCCTGCCGTTCCCAAAATGGGAAACTCGACTGCATAATTTGGTAGTGGGGACTGCGTTCGCCCTGTCCCTG  | 65427              | 65586    | 148/160 (93%)  | 8E-58               |                |             |         |          |       |
| 1          | reverse   | NT_004487.19     | GCGCACTTCTATGATAGTA           | 93950   | 93931   | AAGTGACCGTGCCTGTA               | 93778    | 93796    | ATACTTACCTGGCAGGGAGATACCATGATCACGAAGTGGTTTTCCAGGGGAGGCTTATCCGTTATGTCGCGGATGCTGACCCCTGCCGTTCCCAAAATGGGAAACTCGACTGCATAATTTGGTAGTGGGGACTGCGTTCGCCCTGTCCCTG   | 93714              | 93550    | 148/166 (90%)  | 1E-50               |                |             |         |          |       |
| 1          | reverse   | NT_004487.19     | GCGCACTTCTATGATAGTA           | 259978  | 259959  | AAGTGACCGTGCCTGTA               | 259808   | 259790   | ATACTTACCTGGCAGGGAGATACCATGATCACGAAGTGGTTTTCCAGGGGAGGCTTATCCGTTATGTCGCGGATGCTGACCCCTGCCGTTCCCAAAATGGGAAACTCGACTGCATAATTTGGTAGTGGGGACTGCGTTCGCCCTGTCCCTG   | 259744             | 259580   | 146/166 (88%)  | 3E-47               |                |             |         |          |       |
| 1          | reverse   | NT_004487.19     |                               |         |         | AAGTGACCGTGCCTGTA               | 682975   | 682957   | ACTTACCTGGCAGGGAGATACCATGATCACGAAGTGGTTTTCCAGGGGAGGCTTATCCATGCACCTCCGATGTGCTGACCCCTGCCGTTCCCAAAATGGGAAACTCGACTGCATAATTTGGTAGTGGGGACTGCGTTCGCCCTGTCCCTG    | 682909             | 682748   | 152/162 (94%)  | 8E-63               |                |             |         |          |       |
| 1          | reverse   | NT_004487.19     | GCGCACTTCTATGATAGTA           | 713108  | 713089  | AAGTGACCGTGCCTGTA               | 712927   | 712909   | ATACTTACCTGGCAGGGAGATACCATGATCACGAAGTGGTTTTCCAGGGGAGGCTTATCCATGCACCTCCGATGTGCTGACCCCTGCCGTTCCCAAAATGGGAAACTCGACTGCATAATTTGGTAGTGGGGACTGCGTTCGCCCTGTCCCTG  | 712863             | 712700   | 164/164 (100%) | 1E-80               |                |             |         |          |       |
| 1          | reverse   | NT_004487.19     | GCGCACTTCTATGATAGTA           | 1003122 | 1003103 | AAGTGACCGTGCCTGTA               | 1002962  | 1002944  | ATACTTACCTGGCAGGGAGATACCATGATCACGAAGTGGTTTTCCAGGGGAGGCTTATCCATGCACCTCCGATGTGCTGACCCCTGCCGTTCCCAAAATGGGAAACTCGACTGCATAATTTGGTAGTGGGGACTGCGTTCGCCCTGTCCCTG  | 1002898            | 1002732  | 155/167 (93%)  | 4E-61               |                |             |         |          |       |
| 1          | reverse   | NT_167185.1      | GCGCACTTCTATGATAGTA           | 1297248 | 1297229 |                                 |          |          | ATACTTACCTGGCAGGGAGATACCATGATCACGAAGTGGTTTTCCAGGGGAGGCTTATCCATGCACCTCCGATGTGCTGACCCCTGCCGTTCCCAAAATGGGAAACTCGACTGCATAATTTGGTAGTGGGGACTGCGTTCGCCCTGTCCCTG  | 1297200            | 1296857  | 163/164 (99%)  | 6E-79               |                |             |         |          |       |
| 1          | reverse   | NT_167185.1      | GCGCACTTCTATGATAGTA           | 2838982 | 2838963 |                                 |          |          | ATACTTACCTGGCAGGGAGATACCATGATCACGAAGTGGTTTTCCAGGGGAGGCTTATCCATGCACCTCCGATGTGCTGACCCCTGCCGTTCCCAAAATGGGAAACTCGACTGCATAATTTGGTAGTGGGGACTGCGTTCGCCCTGTCCCTG  | 2838754            | 2838591  | 163/164 (99%)  | 6E-79               |                |             |         |          |       |
| 1          | reverse   | NT_167185.1      |                               |         |         | AAGTGACCGTGCCTGTA               | 3162318  | 3162299  | ATACTTACCTGGCAGGGAGATACCATGATCACGAAGTGGTTTTCCAGGGGAGGCTTATCCATGCACCTCCGATGTGCTGACCCCTGCCGTTCCCAAAATGGGAAACTCGACTGCATAATTTGGTAGTGGGGACTGCGTTCGCCCTGTCCCTG  | 3162252            | 3162089  | 159/165 (97%)  | 1E-70               |                |             |         |          |       |
| 1          | reverse   | NT_167185.1      | GCGCACTTCTATGATAGTA           | 3188607 | 3188588 |                                 |          |          | ATATTTACTTGGCAGGGAGATACCATGATCACGAAGTGGTTTTCCAGGGGAGGCTTATCCATGCACCTCCGATGTGCTGACCCCTGCCGTTCCCAAAATGGGAAACTCGACTGCATAATTTGGTAGTGGGGACTGCGTTCGCCCTGTCCCTG  | 3188390            | 3188229  | 159/164 (95%)  | 5E-65               |                |             |         |          |       |
| 1          | forward   | NT_167185.1      | GCGCACTTCTATGATAGTA           | 3321510 | 3321529 | AAGTGACCGTGCCTGTA               | 3321669  | 3321687  | ATACTTACCTGGCAGGGAGATACCATGATCACGAAGTGGTTTTCCAGGGGAGGCTTATCCATGCACCTCCGATGTGCTGACCCCTGCCGTTCCCAAAATGGGAAACTCGACTGCATAATTTGGTAGTGGGGACTGCGTTCGCCCTGTCCCTG  | 3321333            | 3321900  | 153/168 (92%)  | 1E-56               |                |             |         |          |       |
| 1          | reverse   | NT_004610.19     | GCGCACTTCTATGATAGTA           | 3521098 | 3521079 | AAGTGACCGTGCCTGTA               | 3520932  | 3520914  | ATACTTACCTGGCAGGGAGATACCATGATCACGAAGTGGTTTTCCAGGGGAGGCTTATCCATGCACCTCCGATGTGCTGACCCCTGCCGTTCCCAAAATGGGAAACTCGACTGCATAATTTGGTAGTGGGGACTGCGTTCGCCCTGTCCCTG  | 3520868            | 3520705  | 164/164 (100%) | 1E-80               | GTTCACAAAACAGA | 3520894     | 3520881 |          |       |
| 1          | reverse   | NT_004610.19     | GCGCACTTCTATGATAGTA           | 3673760 | 3673741 | AAGTGACCGTGCCTGTA               | 3673595  | 3673577  | ATACTTACCTGGCAGGGAGATACCATGATCACGAAGTGGTTTTCCAGGGGAGGCTTATCCATGCACCTCCGATGTGCTGACCCCTGCCGTTCCCAAAATGGGAAACTCGACTGCATAATTTGGTAGTGGGGACTGCGTTCGCCCTGTCCCTG  | 3673531            | 3673368  | 164/164 (100%) | 1E-80               | GTTCACAAAACAGA | 3673357     | 3673344 |          |       |
| 1          | forward   | NT_004610.19     | GCGCACTTCTATGATAGTA           | 3746870 | 3746889 | AAGTGACCGTGCCTGTA               | 3747035  | 3747053  | ATACTTACCTGGCAGGGAGATACCATGATCACGAAGTGGTTTTCCAGGGGAGGCTTATCCATGCACCTCCGATGTGCTGACCCCTGCCGTTCCCAAAATGGGAAACTCGACTGCATAATTTGGTAGTGGGGACTGCGTTCGCCCTGTCCCTG  | 3747099            | 3747262  | 164/164 (100%) | 1E-80               | GTTCACAAAACAGA | 3747273     | 3747288 |          |       |
| 1          | forward   | NT_004610.19     | GCGCACTTCTATGATAGTA           | 3902334 | 3902353 | AAGTGACCGTGCCTGTA               | 3902499  | 3902517  | ATACTTACCTGGCAGGGAGATACCATGATCACGAAGTGGTTTTCCAGGGGAGGCTTATCCATGCACCTCCGATGTGCTGACCCCTGCCGTTCCCAAAATGGGAAACTCGACTGCATAATTTGGTAGTGGGGACTGCGTTCGCCCTGTCCCTG  | 3902563            | 3902726  | 164/164 (100%) | 1E-80               |                |             |         |          |       |
| 1          | reverse   | NT_167186.1      |                               |         |         |                                 |          |          | ATACTTACCTGGCAGGGAGATACCATGATCACGAAGTGGTTTTCCAGGGGAGGCTTATCCATGCACCTCCGATGTGCTGACCCCTGCCGTTCCCAAAATGGGAAACTCGACTGCATAATTTGGTAGTGGGGACTGCGTTCGCCCTGTCCCTG  | 39815171           | 39815011 | 138/163 (85%)  | 1E-36               |                |             |         |          |       |
| 4          | reverse   | NT_022778.16     |                               |         |         |                                 |          |          | ATACTTACCTGGCAGGGAGATACCATGATCACGAAGTGGTTTTCCAGGGGAGGCTTATCCATGCACCTCCGATGTGCTGACCCCTGCCGTTCCCAAAATGGGAAACTCGACTGCATAATTTGGTAGTGGGGACTGCGTTCGCCCTGTCCCTG  | 8506139            | 8505977  | 147/163 (91%)  | 2E-53               |                |             |         |          |       |
| 4          | forward   | NT_016354.19     |                               |         |         |                                 |          |          | ATACTTACCTGGCAGGGAGATACCATGATCACGAAGTGGTTTTCCAGGGGAGGCTTATCCATGCACCTCCGATGTGCTGACCCCTGCCGTTCCCAAAATGGGAAACTCGACTGCATAATTTGGTAGTGGGGACTGCGTTCGCCCTGTCCCTG  | 38889200           | 38889363 | 149/165 (91%)  | 6E-54               |                |             |         |          |       |
| 4          | reverse   | NT_016354.19     |                               |         |         |                                 |          |          | ATACTTACCTGGCAGGGAGATACCATGATCACGAAGTGGTTTTCCAGGGGAGGCTTATCCATGCACCTCCGATGTGCTGACCCCTGCCGTTCCCAAAATGGGAAACTCGACTGCATAATTTGGTAGTGGGGACTGCGTTCGCCCTGTCCCTG  | 61464968           | 61464805 | 159/164 (97%)  | 3E-72               |                |             |         |          |       |
| 5          | forward   | NT_023133.13     |                               |         |         |                                 |          |          | ATACTTACCTGGCAGGGAGATACCATGATCACGAAGTGGTTTTCCAGGGGAGGCTTATCCATGCACCTCCGATGTGCTGACCCCTGCCGTTCCCAAAATGGGAAACTCGACTGCATAATTTGGTAGTGGGGACTGCGTTCGCCCTGTCCCTG  | 23122989           | 2312353  | 151/165 (92%)  | 3E-57               |                |             |         |          |       |
| 6          | forward   | NT_007592.15     |                               |         |         |                                 |          |          | ATACTTACCTGGCAGGGAGATACCATGATCACGAAGTGGTTTTCCAGGGGAGGCTTATCCATGCACCTCCGATGTGCTGACCCCTGCCGTTCCCAAAATGGGAAACTCGACTGCATAATTTGGTAGTGGGGACTGCGTTCGCCCTGTCCCTG  | 13154288           | 13154451 | 158/165 (96%)  | 6E-69               |                |             |         |          |       |
| 6          | forward   | NT_025741.15     |                               |         |         |                                 |          |          | ATACTTACCTGGCAGGGAGATACCATGATCACGAAGTGGTTTTCCAGGGGAGGCTTATCCATGCACCTCCGATGTGCTGACCCCTGCCGTTCCCAAAATGGGAAACTCGACTGCATAATTTGGTAGTGGGGACTGCGTTCGCCCTGTCCCTG  | 26702251           | 26702401 | 142/151 (95%)  | 2E-58               |                |             |         |          |       |
| 6          | reverse   | NT_007592.15     |                               |         |         |                                 |          |          | ATACTTACCTGGCAGGGAGATACCATGATCACGAAGTGGTTTTCCAGGGGAGGCTTATCCATGCACCTCCGATGTGCTGACCCCTGCCGTTCCCAAAATGGGAAACTCGACTGCATAATTTGGTAGTGGGGACTGCGTTCGCCCTGTCCCTG  | 36547449           | 36547344 | 103/106 (98%)  | 2E-43               |                |             |         |          |       |
| 6          | forward   | NT_007592.15     |                               |         |         |                                 |          |          | ATAATTTACTTGGCAGGGAGATACCATGATCACGAAGTGGTTTTCCAGGGGAGGCTTATCCATGCACCTCCGATGTGCTGACCCCTGCCGTTCCCAAAATGGGAAACTCGACTGCATAATTTGGTAGTGGGGACTGCGTTCGCCCTGTCCCTG | 53024059           | 53024218 | 146/160 (92%)  | 5E-55               |                |             |         |          |       |
| 7          | forward   | NT_033968.6      |                               |         |         |                                 |          |          | ATACTTACCTGGCAGGGAGATACCATGATCACGAAGTGGTTTTCCAGGGGAGGCTTATCCATGCACCTCCGATGTGCTGACCCCTGCCGTTCCCAAAATGGGAAACTCGACTGCATAATTTGGTAGTGGGGACTGCGTTCGCCCTGTCCCTG  | 3023120            | 3023273  | 142/154 (93%)  | 2E-54               |                |             |         |          |       |
| 8          | reverse   | NT_167187.1      |                               |         |         |                                 |          |          | ATACTTACCTGGCAGGGAGATACCATGATCACGAAGTGGTTTTCCAGGGGAGGCTTATCCATGCACCTCCGATGTGCTGACCCCTGCCGTTCCCAAAATGGGAAACTCGACTGCATAATTTGGTAGTGGGGACTGCGTTCGCCCTGTCCCTG  | 11792817           | 11792856 | 151/164 (93%)  | 2E-58               |                |             |         |          |       |
| 8          | forward   | NT_008048.16     |                               |         |         |                                 |          |          | ATACTTACCTGGCAGGGAGATACCATGATCACGAAGTGGTTTTCCAGGGGAGGCTTATCCATGCACCTCCGATGTGCTGACCCCTGCCGTTCCCAAAATGGGAAACTCGACTGCATAATTTGGTAGTGGGGACTGCGTTCGCCCTGTCCCTG  | 42284926           | 42285089 | 150/164 (92%)  | 3E-57               |                |             |         |          |       |
| 10         | forward   | NT_030059.13     |                               |         |         |                                 |          |          | TTACTTGGCAGGGAGATACCATGATCACGAAGTGGTTTTCCAGGGGAGGCTTATCCATGCACCTCCGATGTGCTGACCCCTGCCGTTCCCAAAATGGGAAACTCGACTGCATAATTTGGTAGTGGGGACTGCGTTCGCCCTGTCCCTG      | 39453796           | 39453954 | 149/160 (94%)  | 2E-59               |                |             |         |          |       |
| 12         | reverse   | NT_029419.12     |                               |         |         |                                 |          |          | CTTACTTGGCAGGGAGATACCATGATCACGAAGTGGTTTTCCAGGGGAGGCTTATCCATGCACCTCCGATGTGCTGACCCCTGCCGTTCCCAAAATGGGAAACTCGACTGCATAATTTGGTAGTGGGGACTGCGTTCGCCCTGTCCCTG     | 25387984           | 25387825 | 149/160 (94%)  | 5E-60               |                |             |         |          |       |
| 12         | forward   | NT_029419.12     |                               |         |         |                                 |          |          | CAGGGCAGGCTTGTATTCACTCCAGATGTGCTGACTTCCCAAAATGGGAAACTCGACTGCATAATTTAGTGGGGACTGCGTTCGCCCTGTCCCTG                                                           | 51118768           | 51118874 | 99/112 (88%)   | 2E-23               |                |             |         |          |       |
| 13         | reverse   | NT_027140.6      |                               |         |         |                                 |          |          | CCTGGCAGGAGATACCATGATCACGAAGTGGTTTTCCAGGGGAGGCTTATCCATGCACCTCCGATGTGCTGACCCCTGCCGTTCCCAAAATGGGAAACTCGACTGCATAATTTGGTAGTGGGGACTGCGTTCGCCCTGTCCCTG          | 1629392            | 1629248  | 130/146 (90%)  | 2E-43               |                |             |         |          |       |
| 14         | forward   | NT_026437.12     |                               |         |         | AAGTGACCGTGCCTGTA               | 16015856 | 16015874 | ATACTTACCTGGCAGGGAGATACCATGATCACGAAGTGGTTTTCCAGGGGAGGCTTATCCATGCACCTCCGATGTGCTGACCCCTGCCGTTCCCAAAATGGGAAACTCGACTGCATAATTTGGTAGTGGGGACTGCGTTCGCCCTGTCCCTG  | 16015920           | 16016083 | 164/164 (100%) | 1E-80               |                |             |         |          |       |
| 14         | reverse   | NT_026437.12     |                               |         |         | AAGTGACCGTGCCTGTA               | 16025659 | 16025641 | ATACTTACCTGGCAGGGAGATACCATGATCACGAAGTGGTTTTCCAGGGGAGGCTTATCCATGCACCTCCGATGTGCTGACCCCTGCCGTTCCCAAAATGGGAAACTCGACTGCATAATTTGGTAGTGGGGACTGCGTTCGCCCTGTCCCTG  | 16025595           | 16025432 | 164/164 (100%) | 1E-80               |                |             |         |          |       |
| 15         | reverse   | NT_010194.17     |                               |         |         |                                 |          |          | TACTTACTTGGTAGGAGATACCATGATCACGAAGTGGTTTTCCAGGGGAGGCTTATCCATGCACCTCCGATGTGCTGACCCCTGCCGTTCCCAAAATGGGAAACTCGACTGCATAATTTGGTAGTGGGGACTGCGTTCGCCCTGTCCCTG    | 53257822           | 53257123 | 142/163 (88%)  | 6E-44               |                |             |         |          |       |
| 17         | reverse   | NT_010783.15     |                               |         |         |                                 |          |          | ATACTTACCTGGCAGGGAGATACCATGATCACGAAGTGGTTTTCCAGGGGAGGCTTATCCATGCACCTCCGATGTGCTGACCCCTGCCGTTCCCAAAATGGGAAACTCGACTGCATAATTTGGTAGTGGGGACTGCGTTCGCCCTGTCCCTG  | 12303104           | 12300881 | 145/157 (93%)  | 1E-55               |                |             |         |          |       |
| 18         | reverse   | NT_010966.14     |                               |         |         |                                 |          |          | ACCTGGCAGGAGATACCATGATCACGAAGTGGTTTTCCAGGGGAGGCTTATCCATGCACCTCCGATGTGCTGACCCCTGCCGTTCCCAAAATGGGAAACTCGACTGCATAATTTGGTAGTGGGGACTGCGTTCGCCCTGTCCCTG         | 30293962           | 30292805 | 142/161 (89%)  | 1E-45               |                |             |         |          |       |
| 20         | forward   | NT_011387.8      |                               |         |         |                                 |          |          | CTTACTTGGCAGGGAGATACCATGATCACGAAGTGGTTTTCCAGGGGAGGCTTATCCATGCACCTCCGATGTGCTGACCCCTGCCGTTCCCAAAATGGGAAACTCGACTGCATAATTTGGTAGTGGGGACTGCGTTCGCCCTGTCCCTG     | 5810704            | 5810859  | 140/161 (87%)  | 3E-42               |                |             |         |          |       |
| X          | forward   | NT_011786.16     |                               |         |         |                                 |          |          | CTTACTTGGCAGGGAGATACCATGATCACGAAGTGGTTTTCCAGGGGAGGCTTATCCATGCACCTCCGATGTGCTGACCCCTGCCGTTCCCAAAATGGGAAACTCGACTGCATAATTTGGTAGTGGGGACTGCGTTCGCCCTGTCCCTG     | 2825418            | 2825575  | 152/158 (97%)  | 3E-67               |                |             |         |          |       |
| X          | reverse   | NT_011859.17     |                               |         |         |                                 |          |          | TACTTGGCAGGGAGATACCATGATCACGAAGTGGTTTTCCAGGGGAGGCTTATCCATGCACCTCCGATGTGCTGACCCCTGCCGTTCCCAAAATGGGAAACTCGACTGCATAATTTGGTAGTGGGGACTGCGTTCGCCCTGTCCCTG       | 8582721            | 8558114  | 140/158 (90%)  | 3E-47               |                |             |         |          |       |

\*retrieved from reference assembly (version GRCh37) obtained with file transfer protocol (ftp) from "ftp://ftp.ncbi.nlm.nih.gov/genomes/H\_sapiens/".
